# Supplementary material for: Asymmetric Synthesis of Saturated and Unsaturated Hydroxy Fatty Acids (HFAs) and Study of Their Antiproliferative Activity
Source: MDPI journal article supplement (doi:10.3390/biom14010110), 2024-01-15

# **Asymmetric Synthesis of Saturated and Unsaturated Hydroxy Fatty Acids (HFAs) and Study of Their Antiproliferative Activity**

**Olga G. Mountanea<sup>1,2</sup>, Christiana Mantzourani<sup>1,2</sup>, Dimitrios Gkikas<sup>3</sup>, Panagiotis K. Politis<sup>3,4</sup>, George Kokotos<sup>1,2\*</sup>**

<sup>1</sup> *Department of Chemistry, National and Kapodistrian University of Athens, 15771 Athens, Greece*

<sup>2</sup> *Center of Excellence for Drug Design and Discovery, National and Kapodistrian University of Athens, 15771 Athens, Greece*

<sup>3</sup> *Center for Basic Research, Biomedical Research Foundation of the Academy of Athens, 4 Soranou Efessiou Str., 115 27 Athens, Greece*

<sup>4</sup> *School of Medicine, European University Cyprus, Nicosia 2404, Cyprus*

\*To whom correspondence should be addressed. For G.K.: phone: +30 210 7274462; fax: +30 210 7274761; E-mail: gkokotos@chem.uoa.gr.

## **SUPPLEMENTARY MATERIALS**

|                                                   | <b>Page</b> |
|---------------------------------------------------|-------------|
| <b>Table S1.</b> 2-way ANOVA statistical analysis | <b>S3</b>   |
| <b>NMR Spectra</b>                                | <b>S4</b>   |

**Table S1.** 2-way ANOVA statistical analysis with multiple comparisons to DMSO, for all MTT tests of HFAs in A549 and SF268 human cancer cell lines ( $p < 0.05$  \*,  $p < 0.01$  \*\*,  $p < 0.001$  \*\*\*,  $p < 0.0001$  \*\*\*\*).

| <b>A549</b> | 10 $\mu$ M | 25 $\mu$ M | 35 $\mu$ M | 50 $\mu$ M | 75 $\mu$ M | 100 $\mu$ M |
|-------------|------------|------------|------------|------------|------------|-------------|
| 6SHSA       | ns         | **         | ****       | ****       | ****       | ****        |
| 6RHSA       | ns         | ns         | ****       | ****       | ****       | ****        |
| 6SHPA       | ns         | ****       | ****       | ****       | ****       | ****        |
| 6RHPA       | ns         | ns         | ns         | ns         | ****       | ****        |
| 7SHMA       | ns         | ns         | ns         | ns         | ****       | ****        |
| 7RHMA       | ns         | ns         | ns         | ***        | ****       | ****        |
| 8SHPA       | ns         | **         | ****       | ****       | ****       | ****        |
| 8RHPA       | ns         | ***        | ****       | ****       | ****       | ****        |
| 8SHSA       | ns         | ns         | **         | ****       | ****       | ****        |
| 8RHSA       | ns         | ns         | ns         | ****       | ****       | ****        |
| 11SHPA      | ns         | ns         | ns         | ns         | ns         | ns          |
| 11RHPA      | ns         | ns         | ns         | ns         | ns         | ns          |
| 11SHSA      | ns         | ns         | ns         | ns         | ****       | ****        |
| 11RHSA      | ns         | ns         | ns         | ns         | ****       | ****        |
| 7SHOA       | ns         | ns         | ns         | ns         | ****       | ****        |
| 7SHPOA      | ns         | ns         | ns         | ns         | **         | ****        |
| 7RHSA       | *          | **         | ****       | ****       | ****       | ****        |
| PA          | -          | ns         | -          | ns         | -          | ns          |
| SA          | -          | ns         | -          | ns         | -          | ns          |

| <b>SF268</b> | 10 $\mu$ M | 25 $\mu$ M | 35 $\mu$ M | 50 $\mu$ M | 75 $\mu$ M | 100 $\mu$ M |
|--------------|------------|------------|------------|------------|------------|-------------|
| 6SHPA        | ns         | ns         | *          | ****       | ****       | ****        |
| 6RHPA        | ns         | ns         | ns         | ns         | ns         | ns          |
| 6SHSA        | ns         | ns         | ns         | ns         | ****       | ****        |
| 6RHSA        | ns         | ns         | ns         | ns         | ns         | ***         |
| 8SHPA        | ns         | ns         | ns         | ***        | ****       | ****        |
| 8RHPA        | ns         | ns         | ns         | ****       | ****       | ****        |
| 8SHSA        | ns         | ns         | ns         | ns         | *          | ****        |
| 8RHSA        | ns         | ns         | *          | ns         | ****       | ****        |
| 7RHSA        | ns         | ****       | -          | ****       | -          | ****        |
| PA           | -          | ns         | -          | ns         | -          | ns          |
| SA           | -          | ns         | -          | ns         | -          | *           |

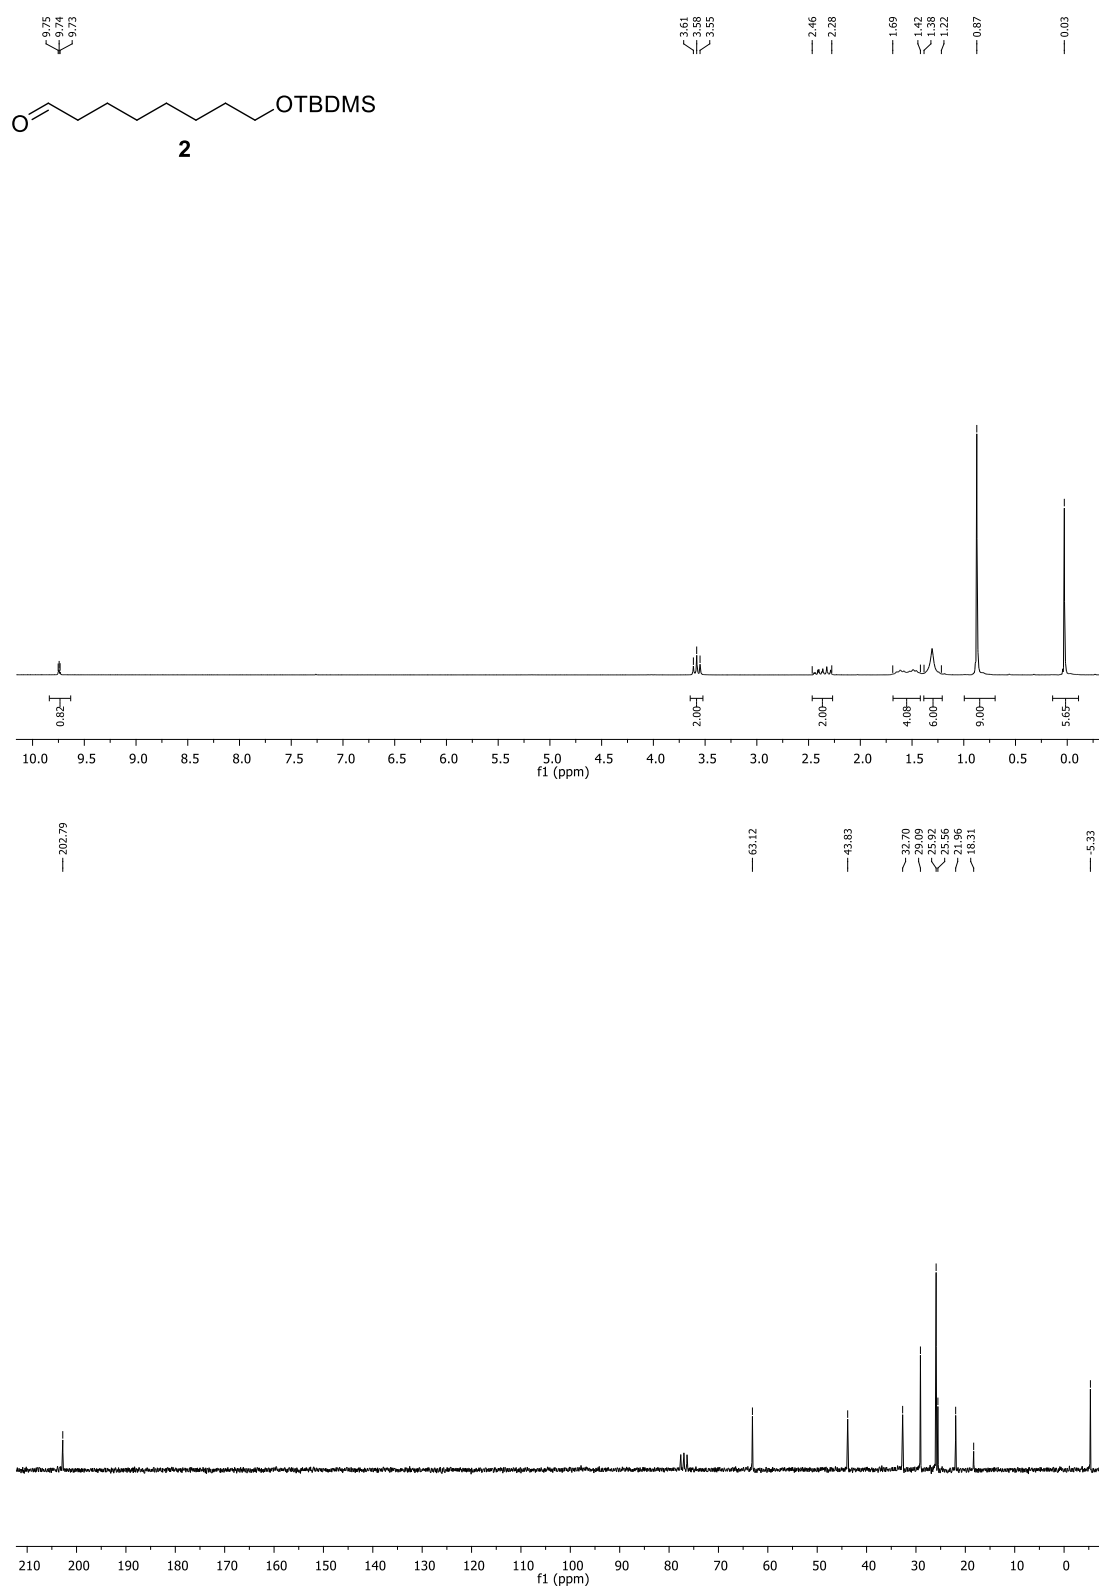

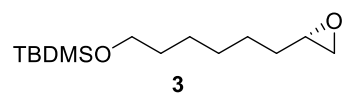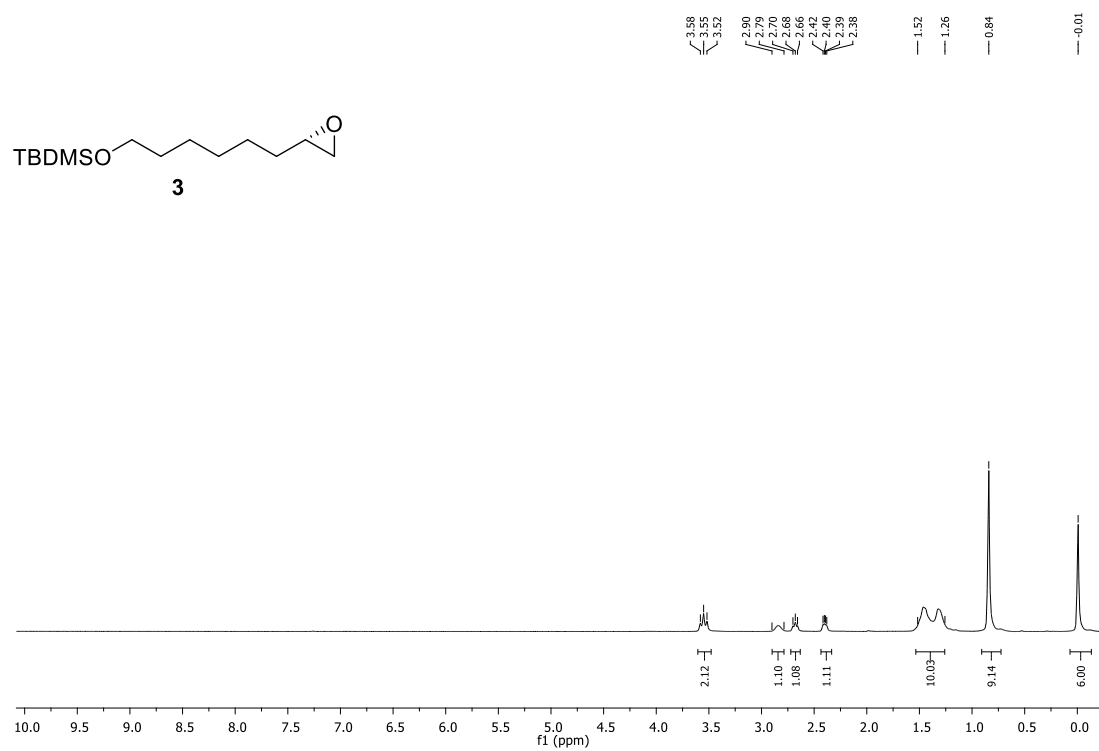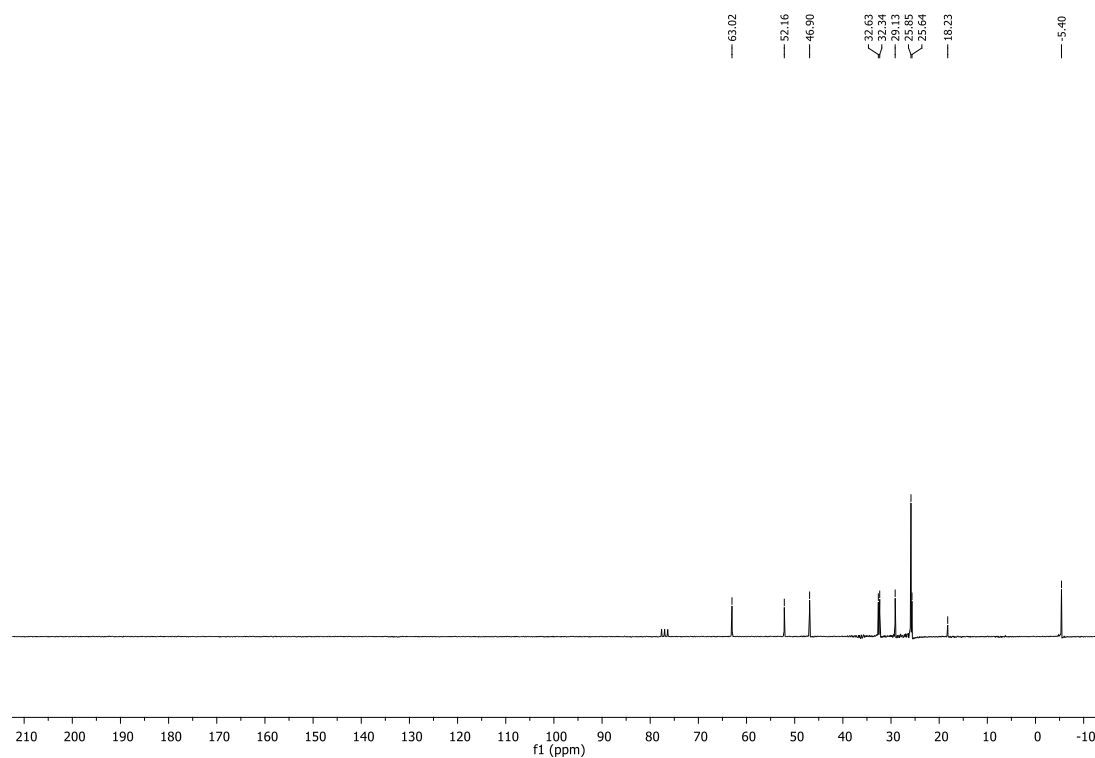

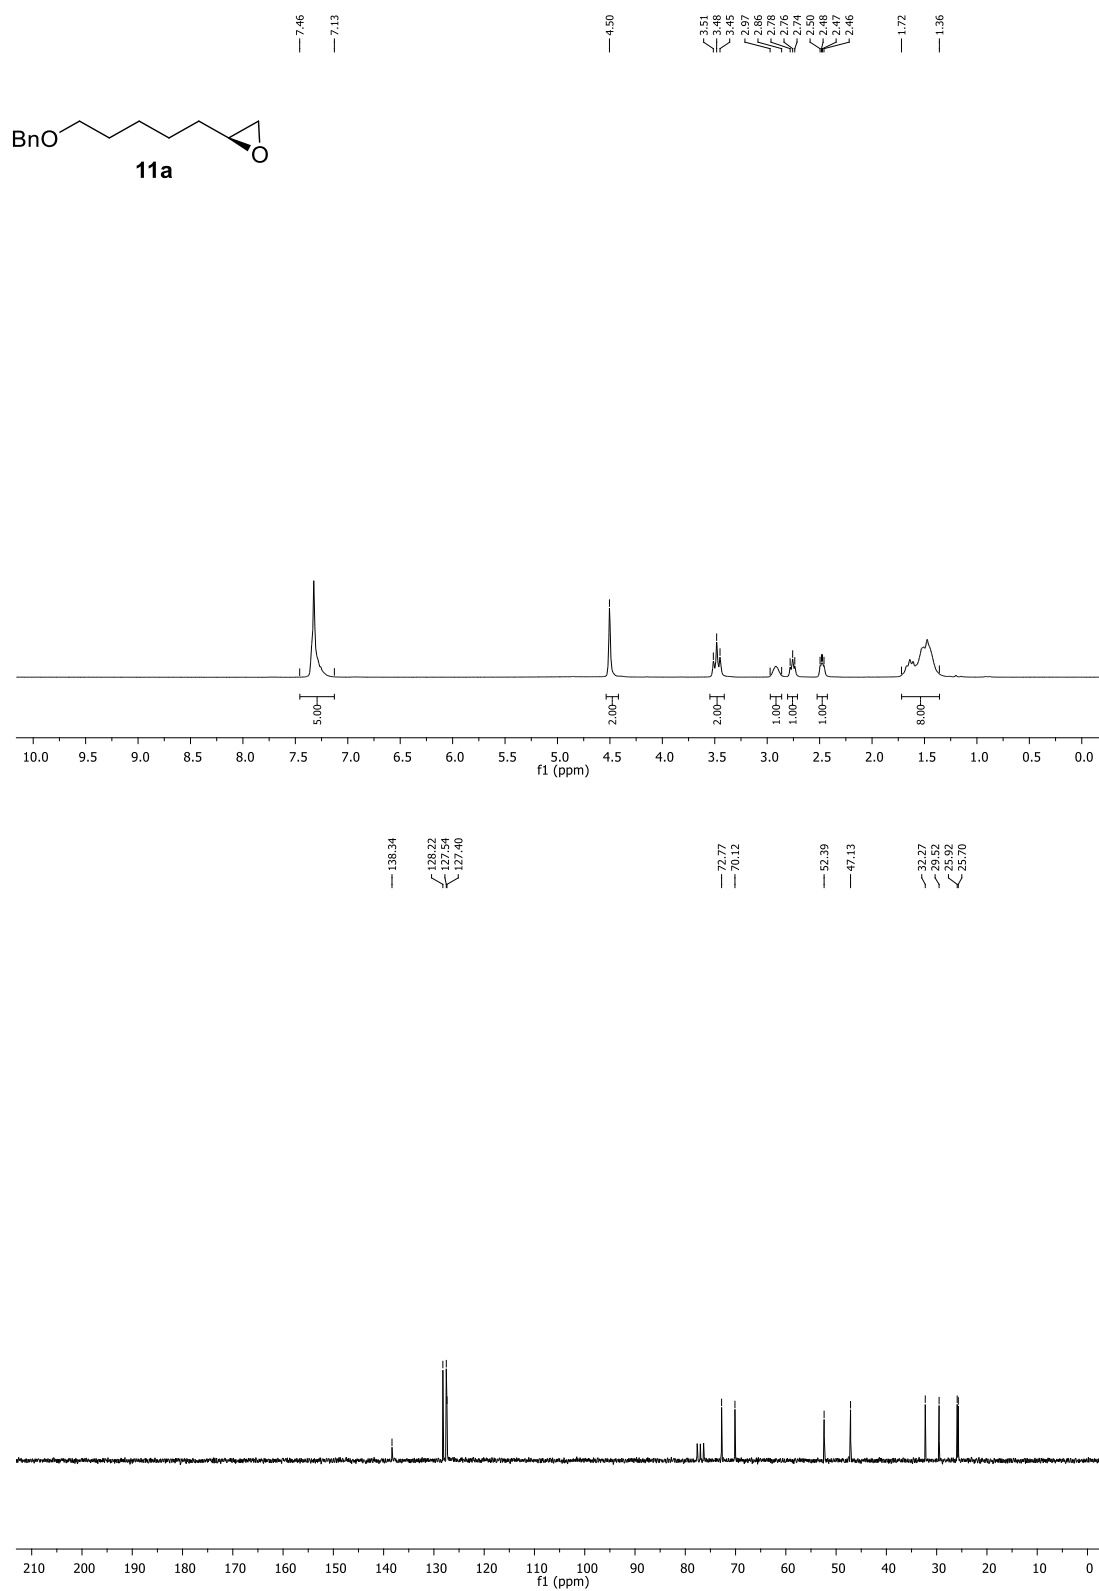

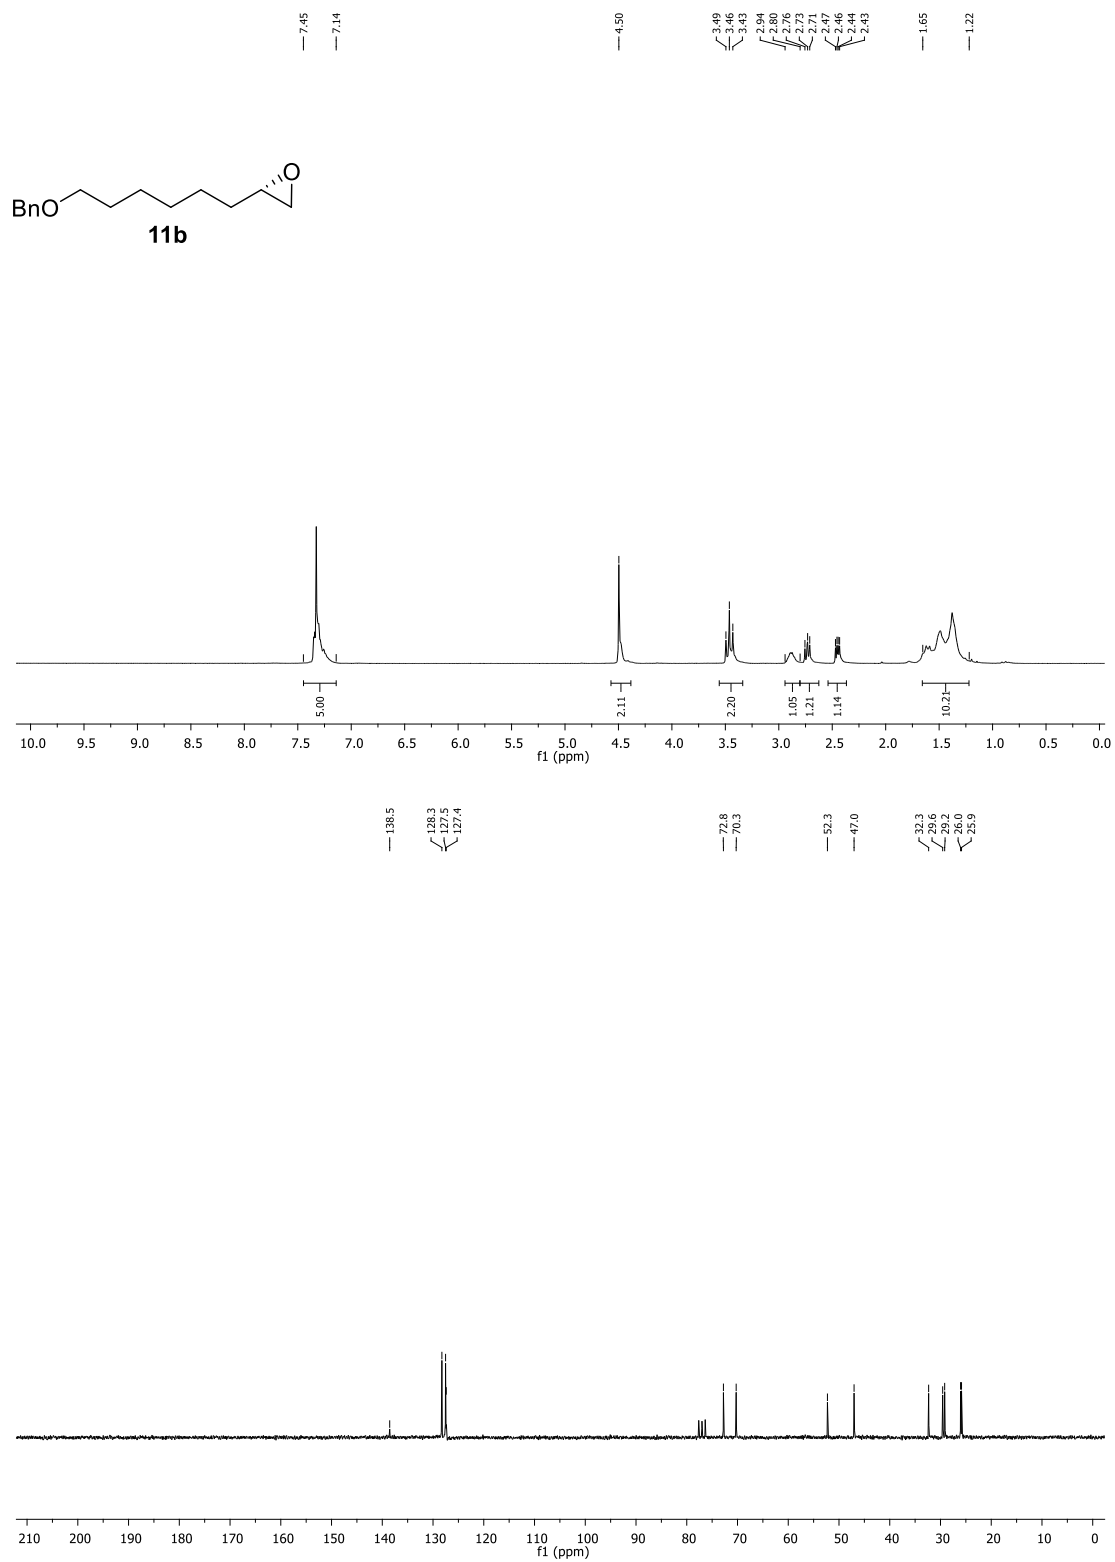

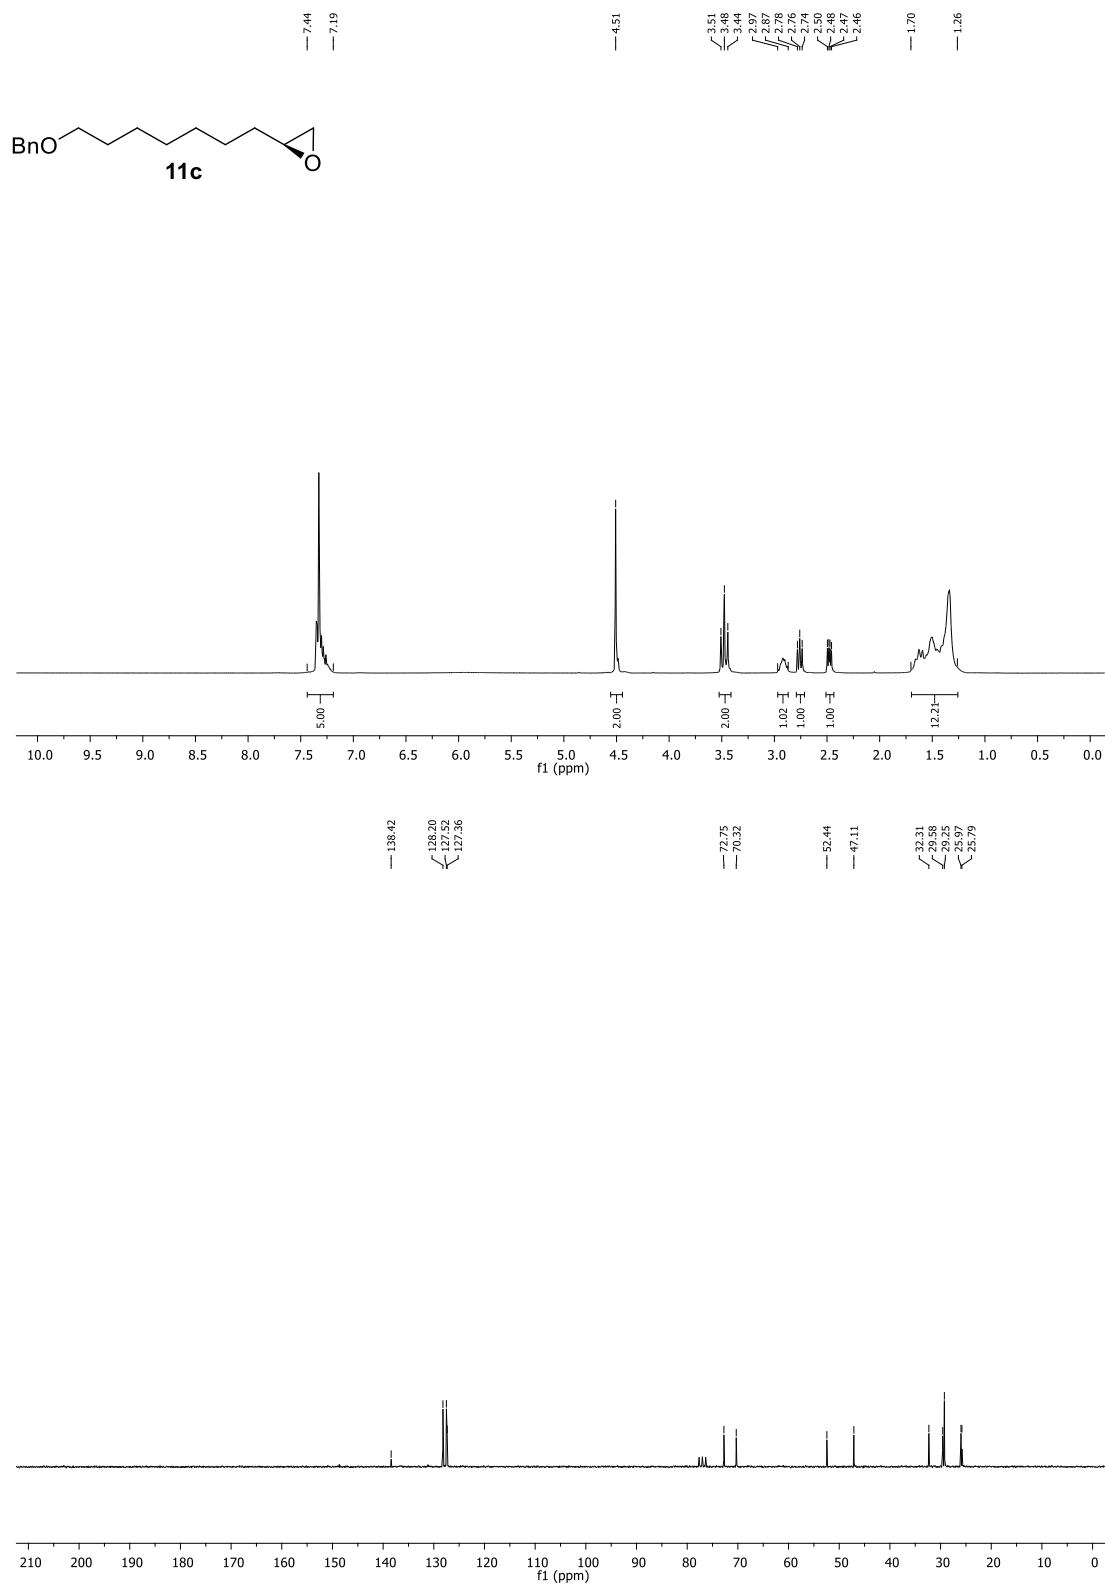



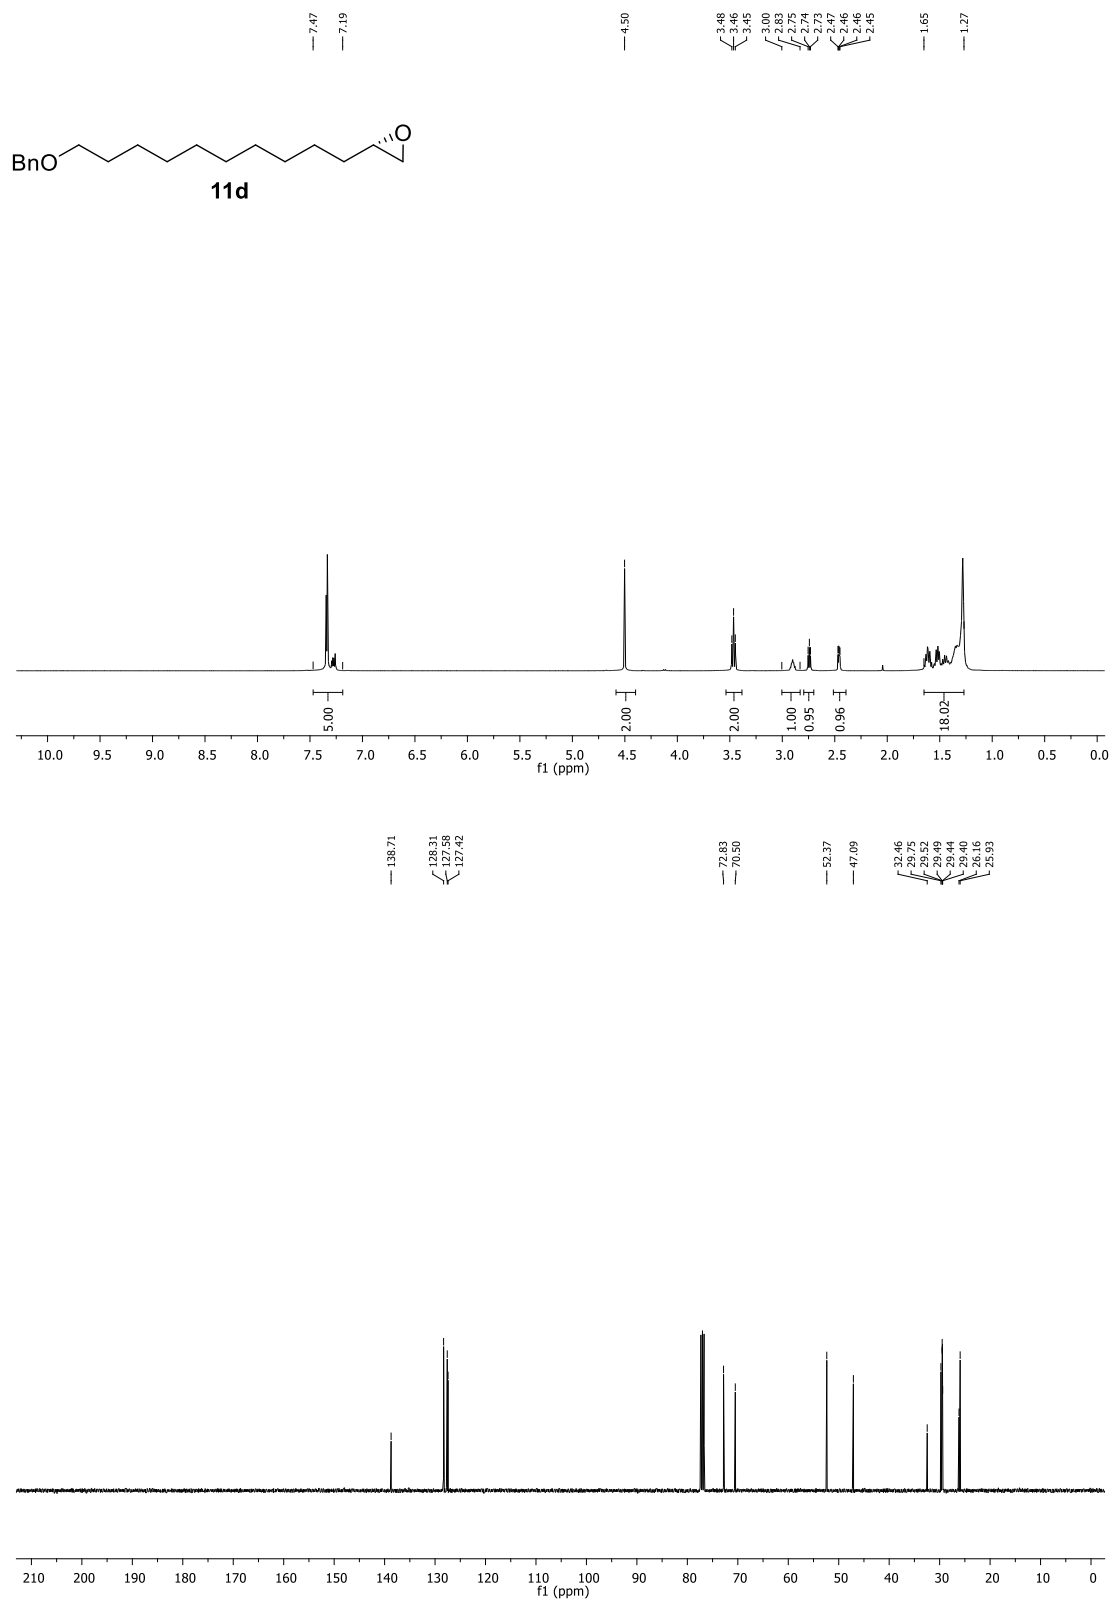

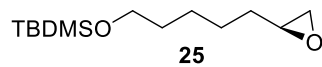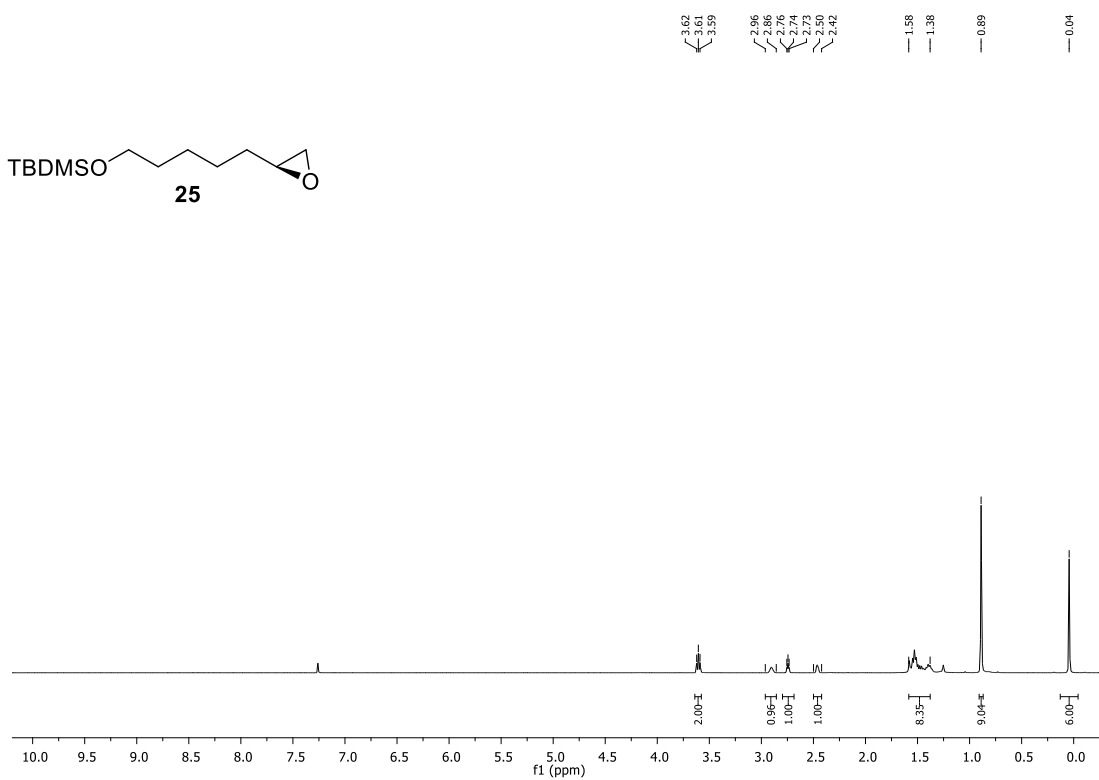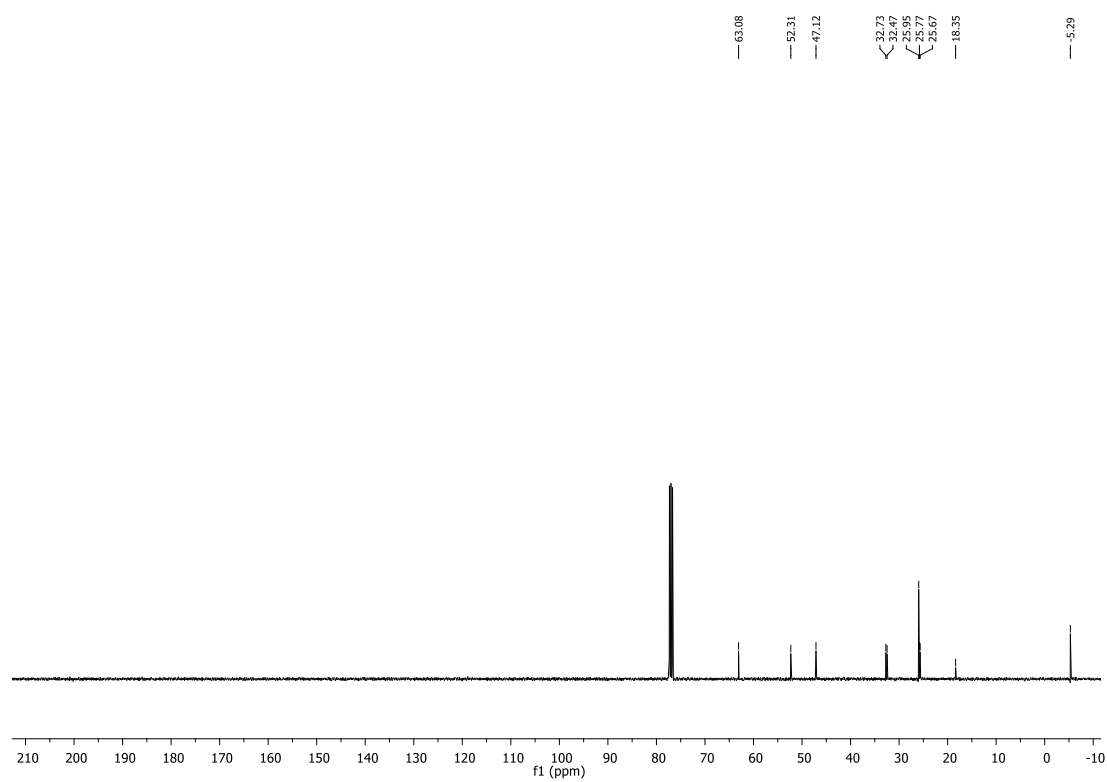

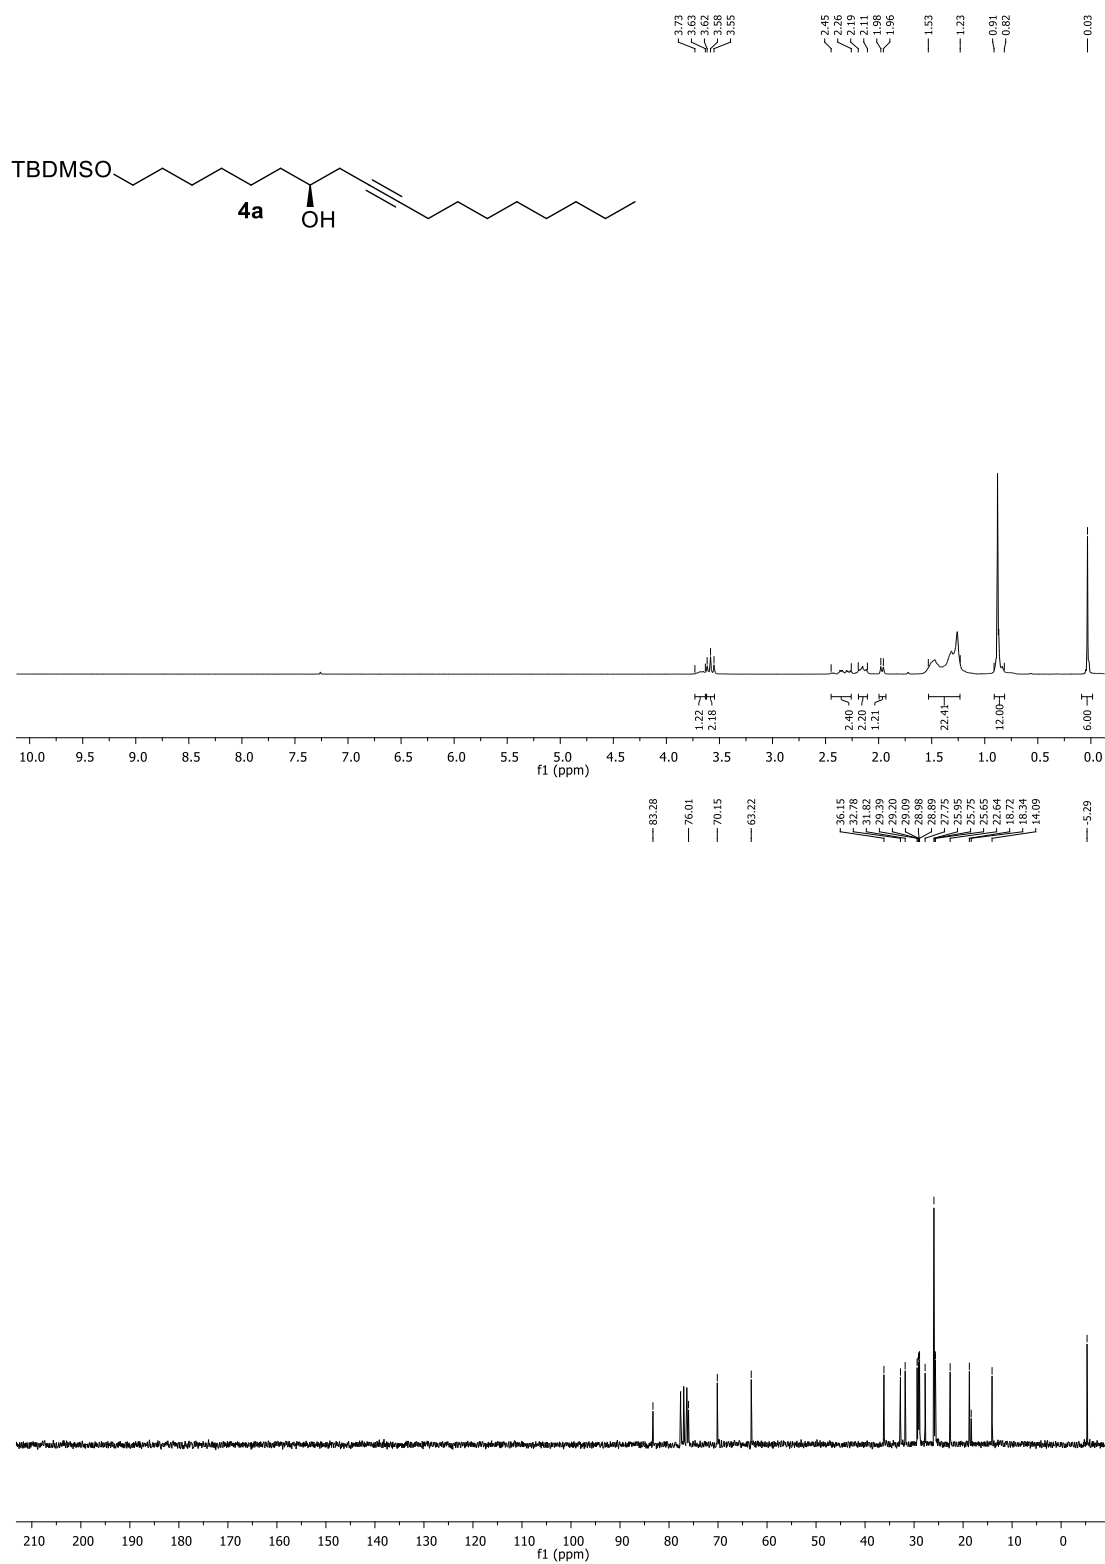

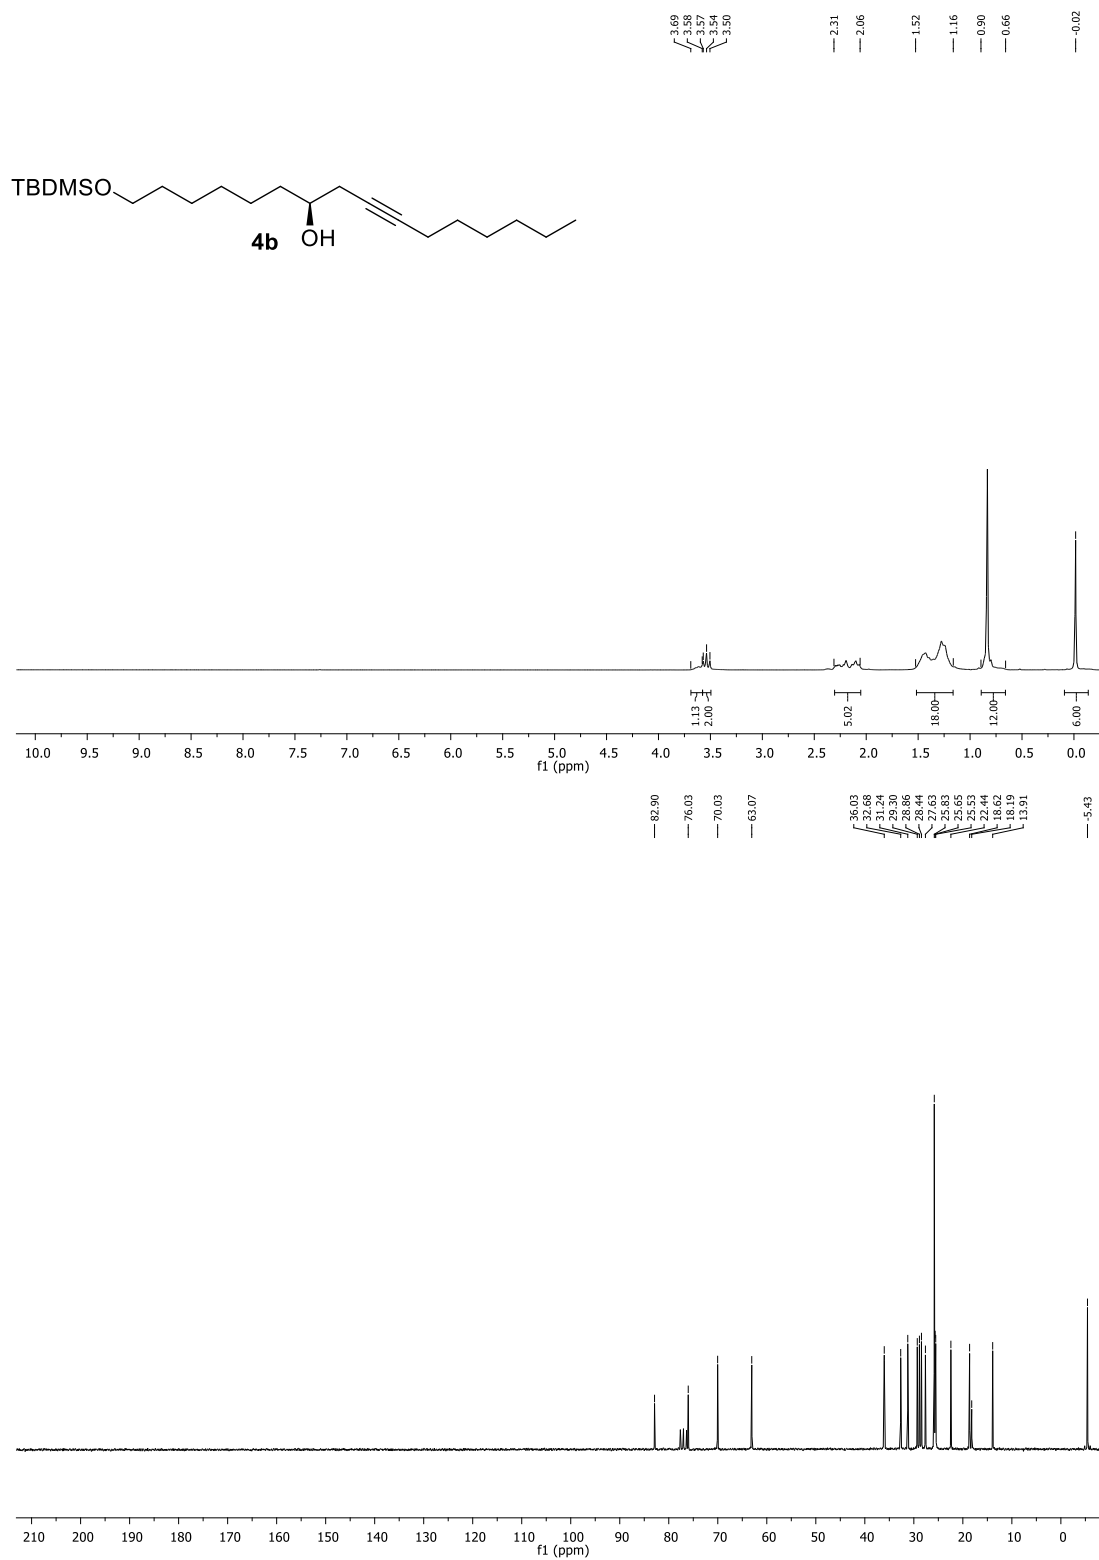

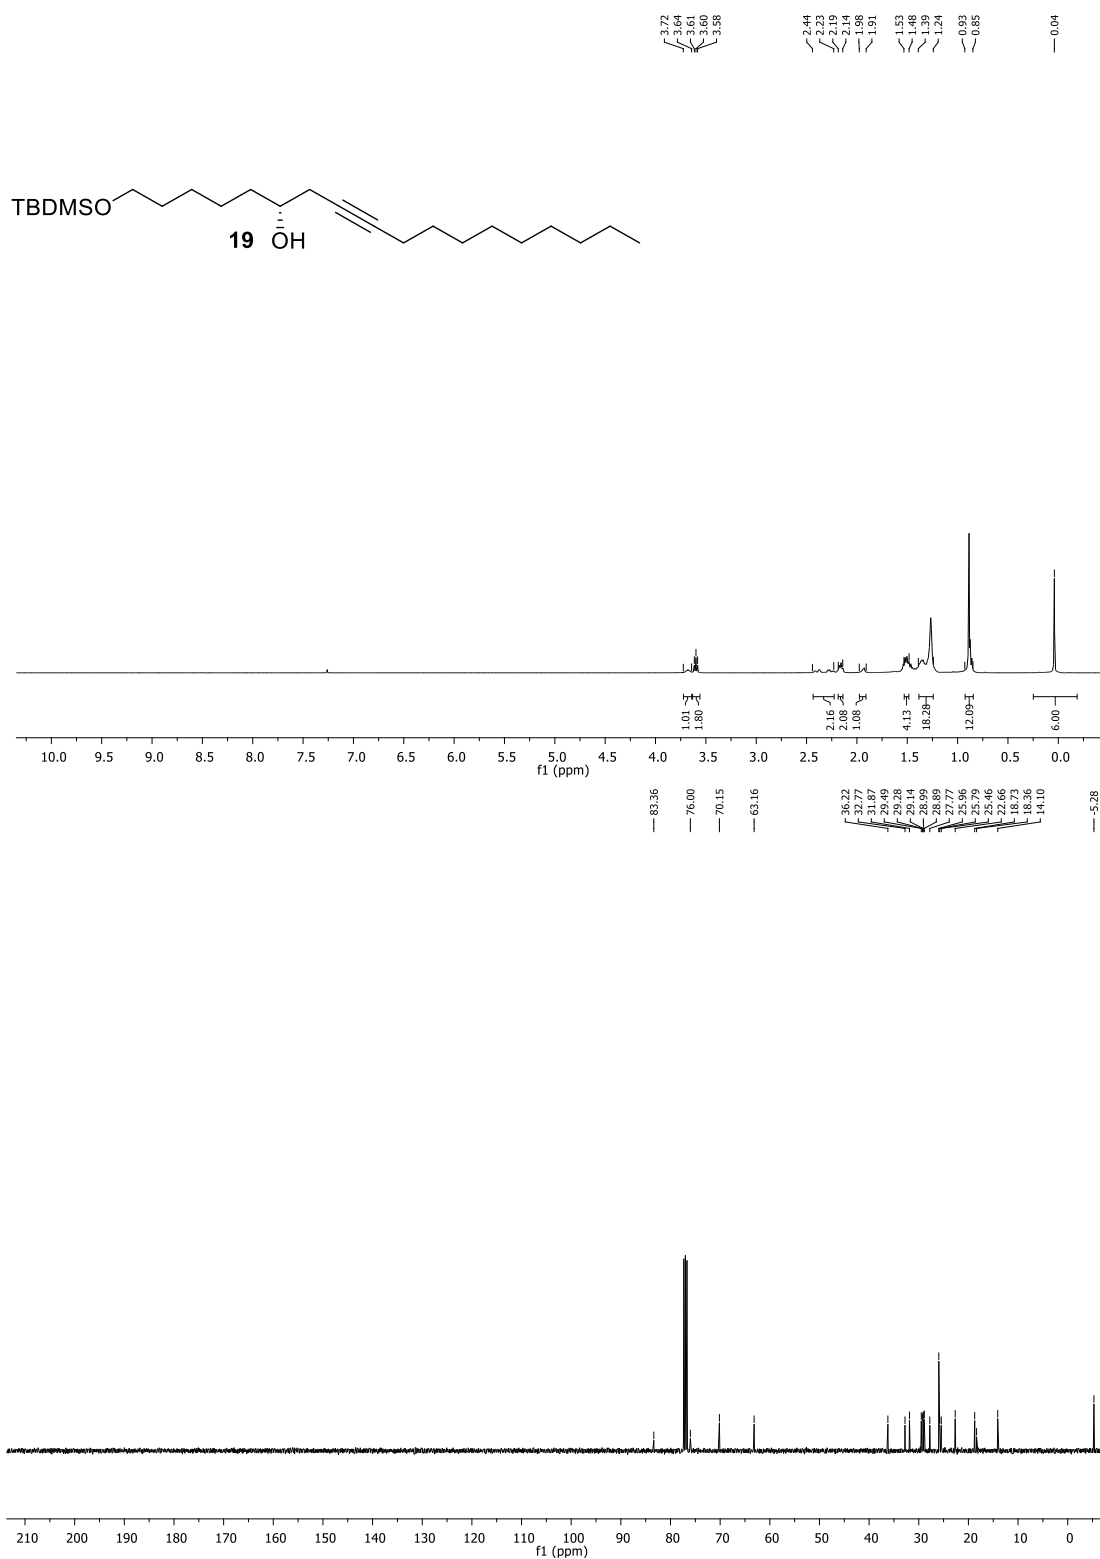

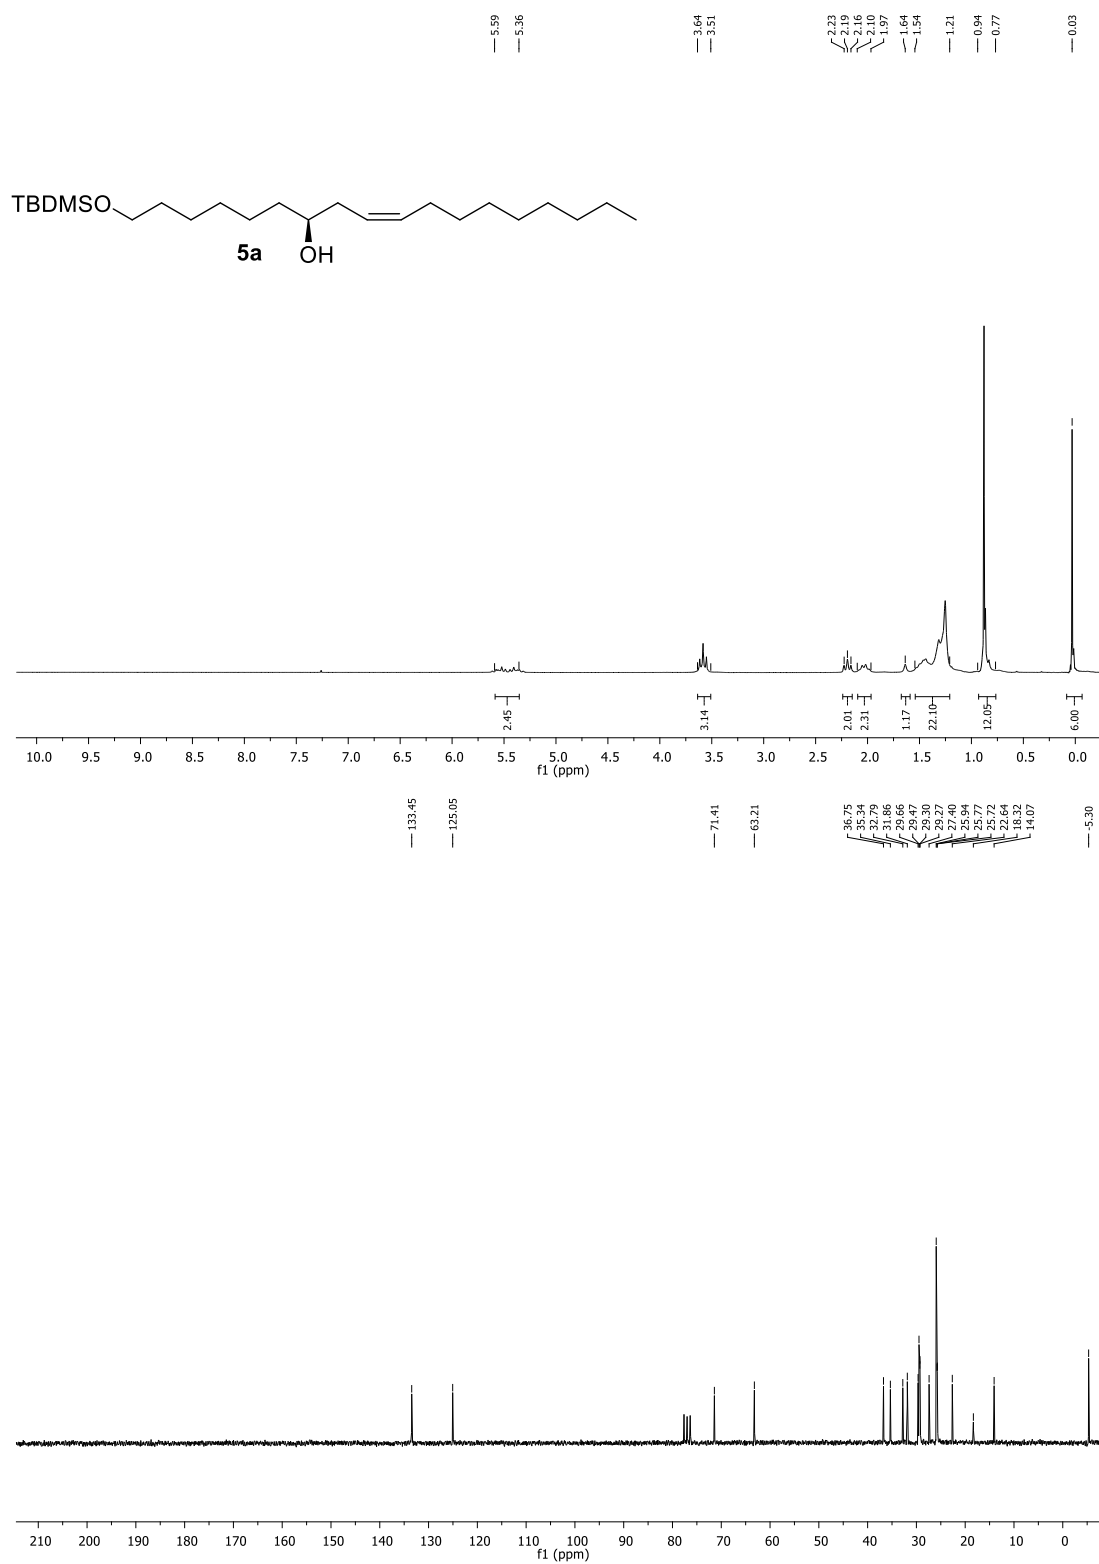

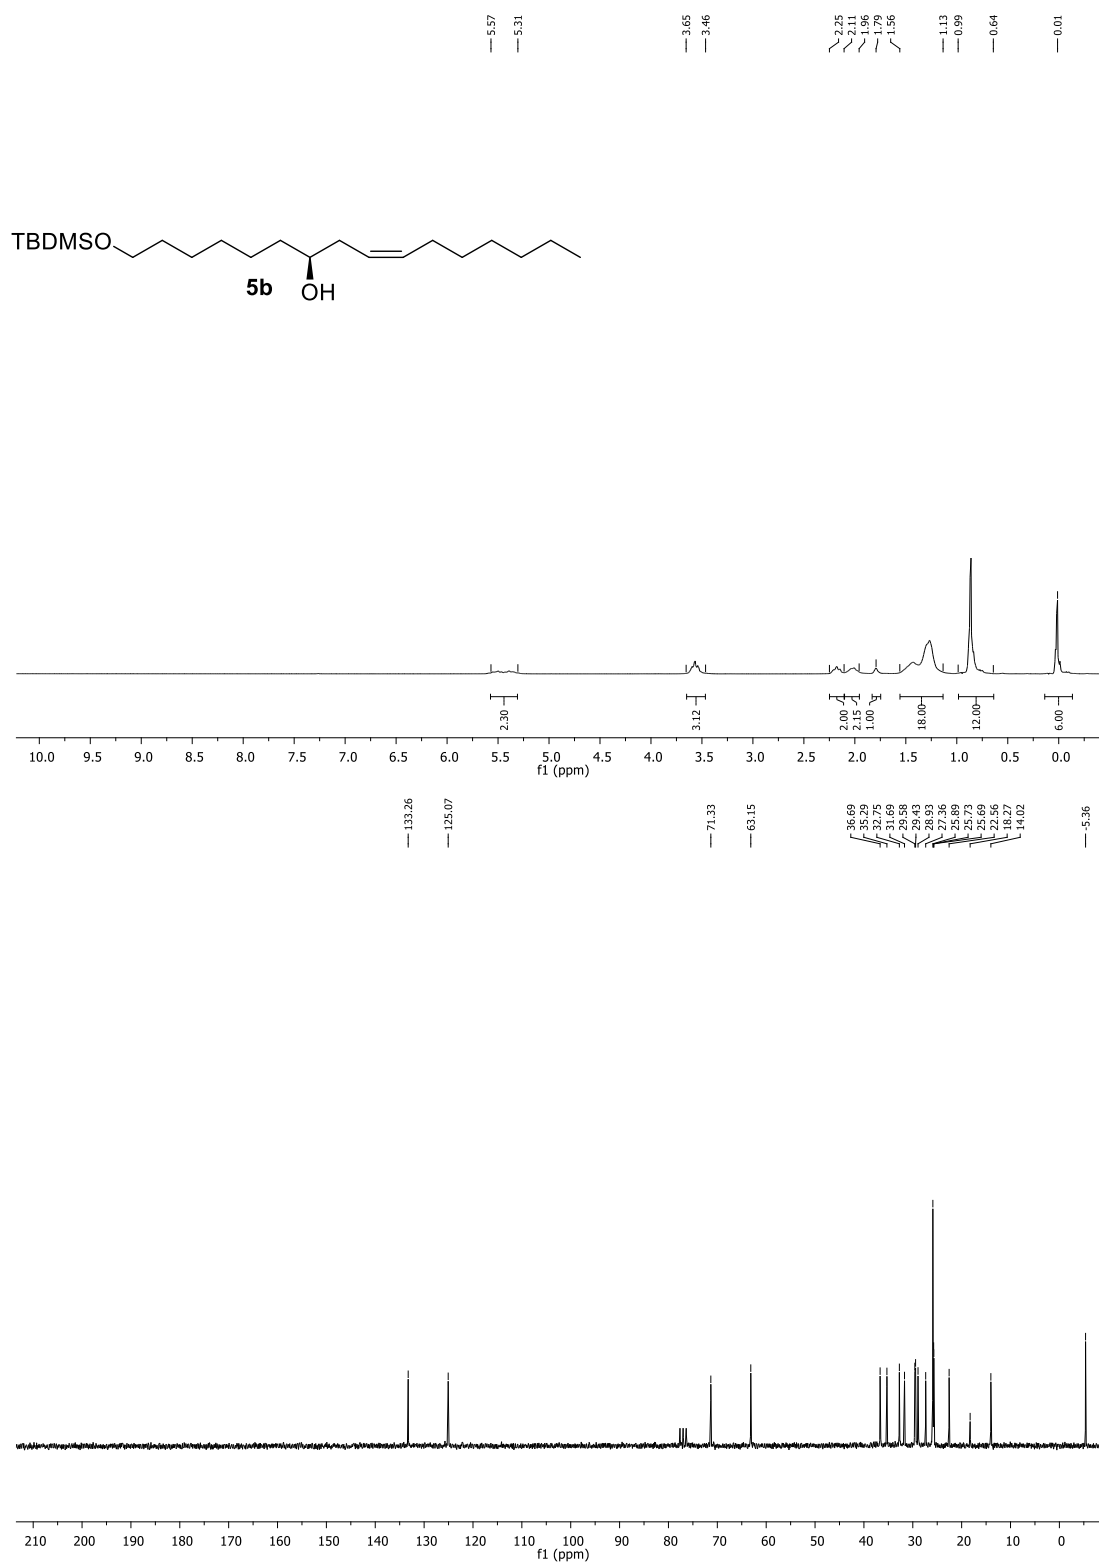

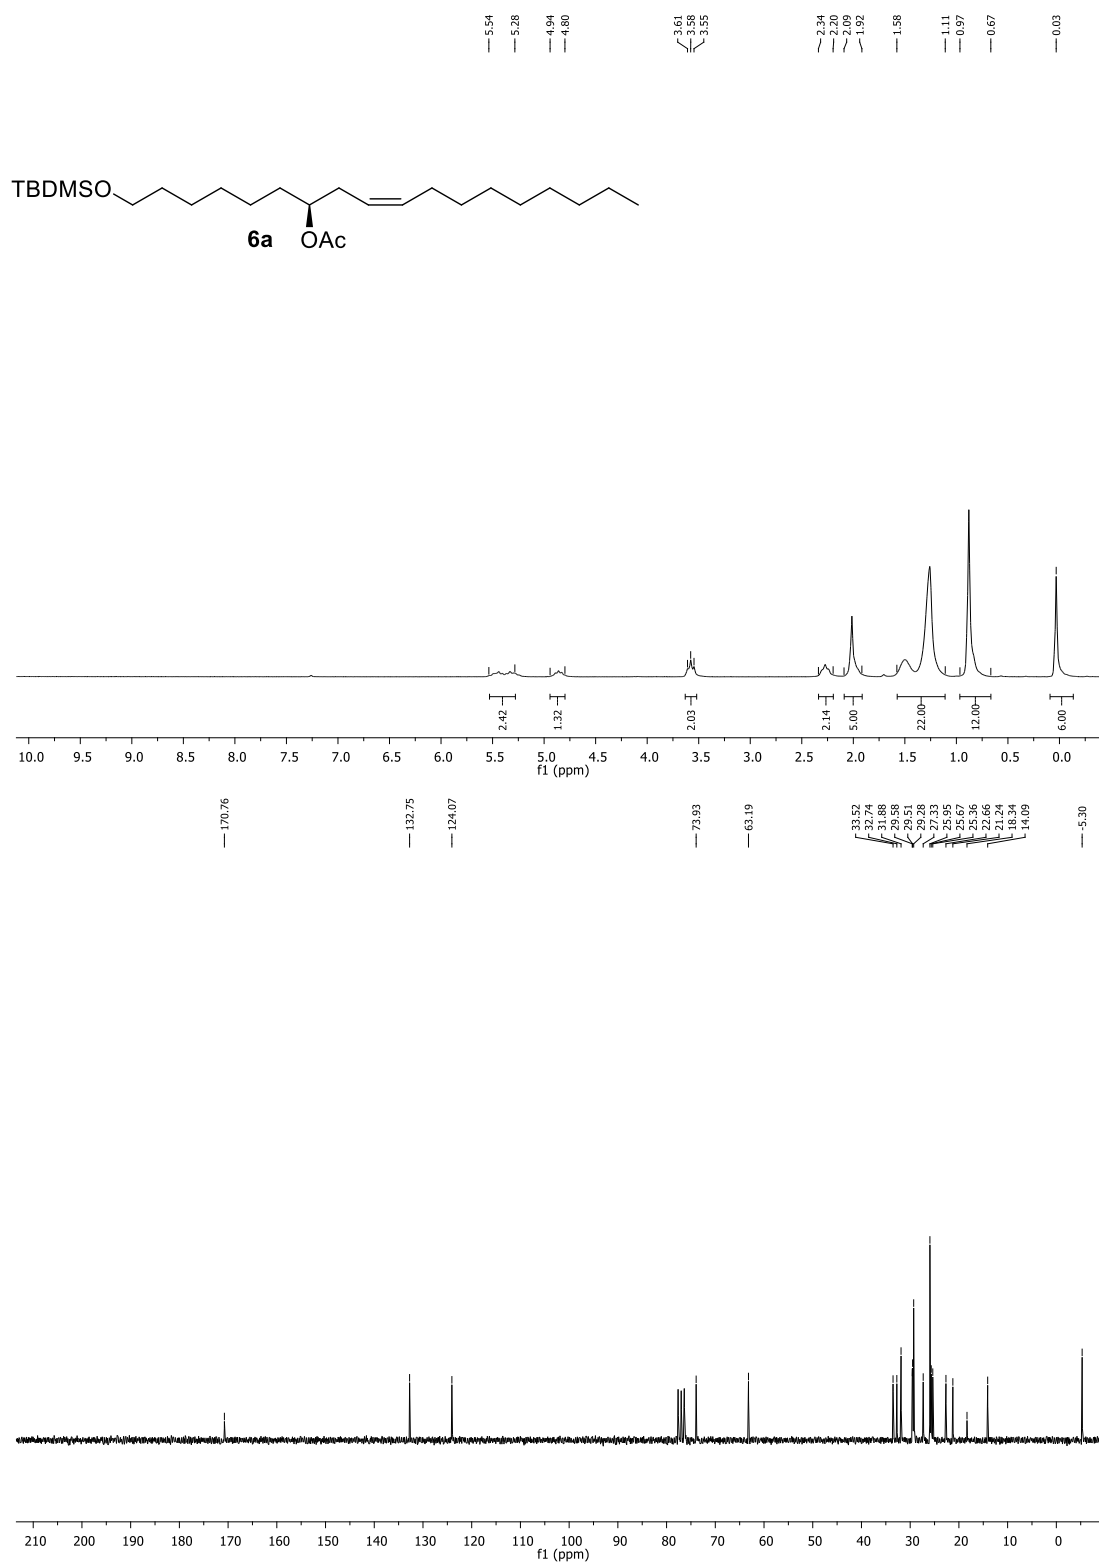



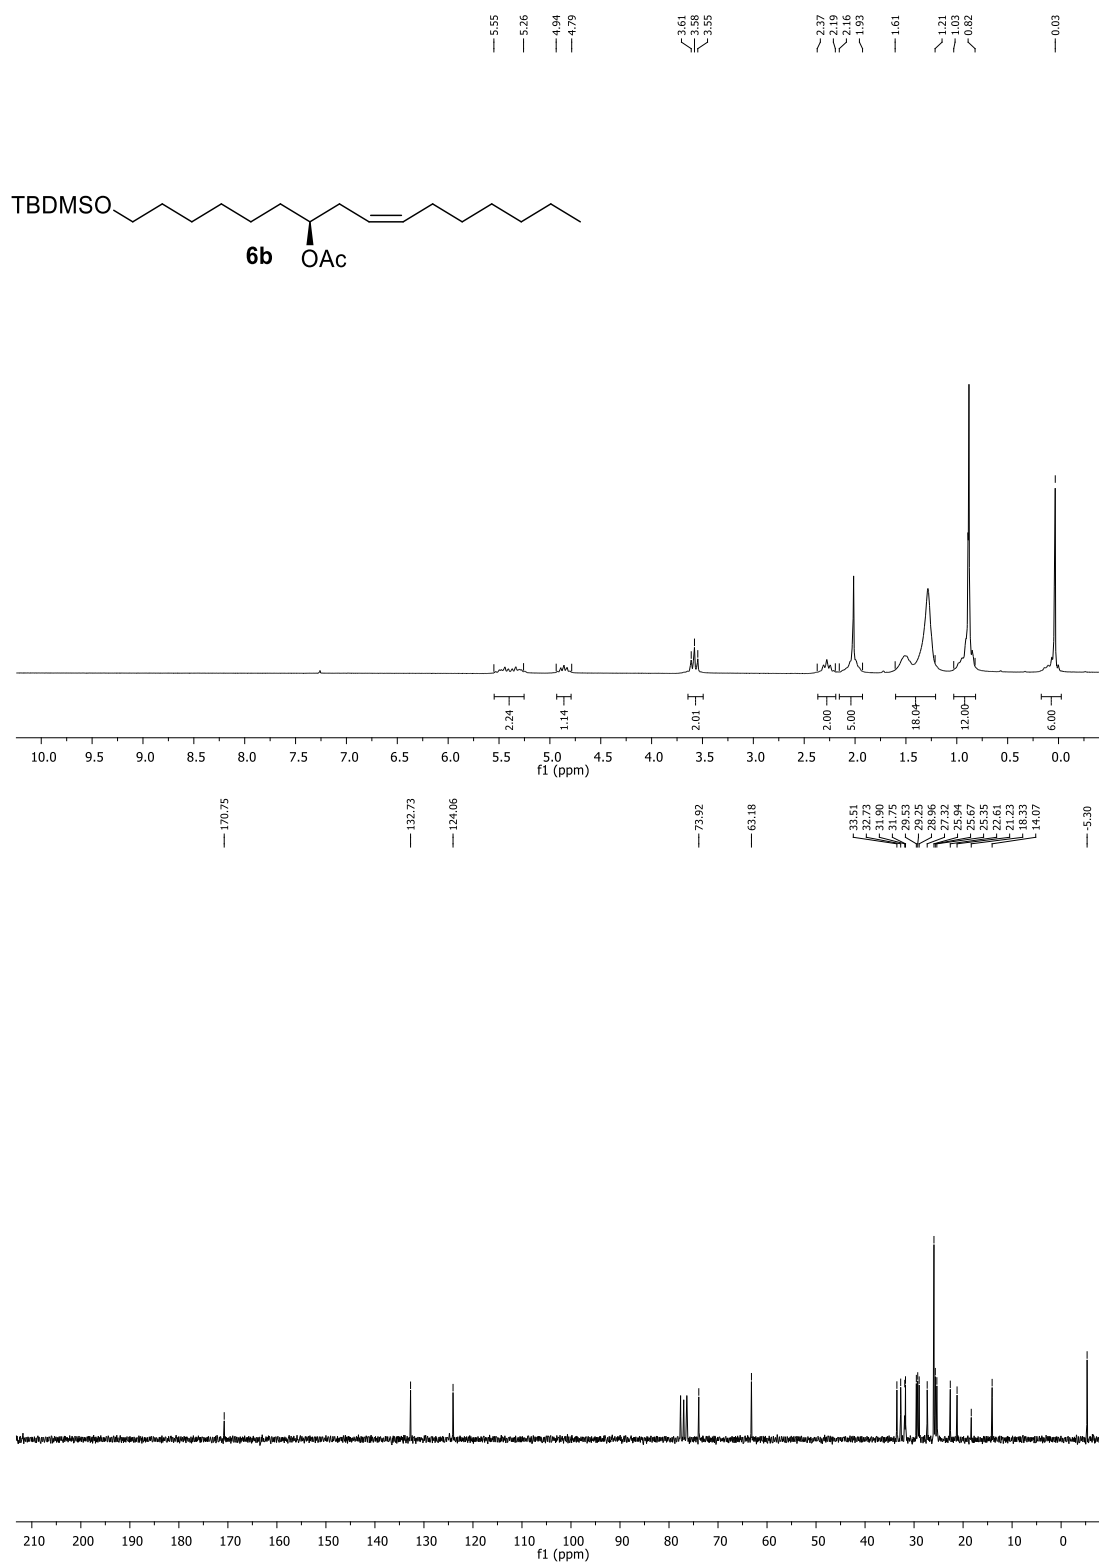

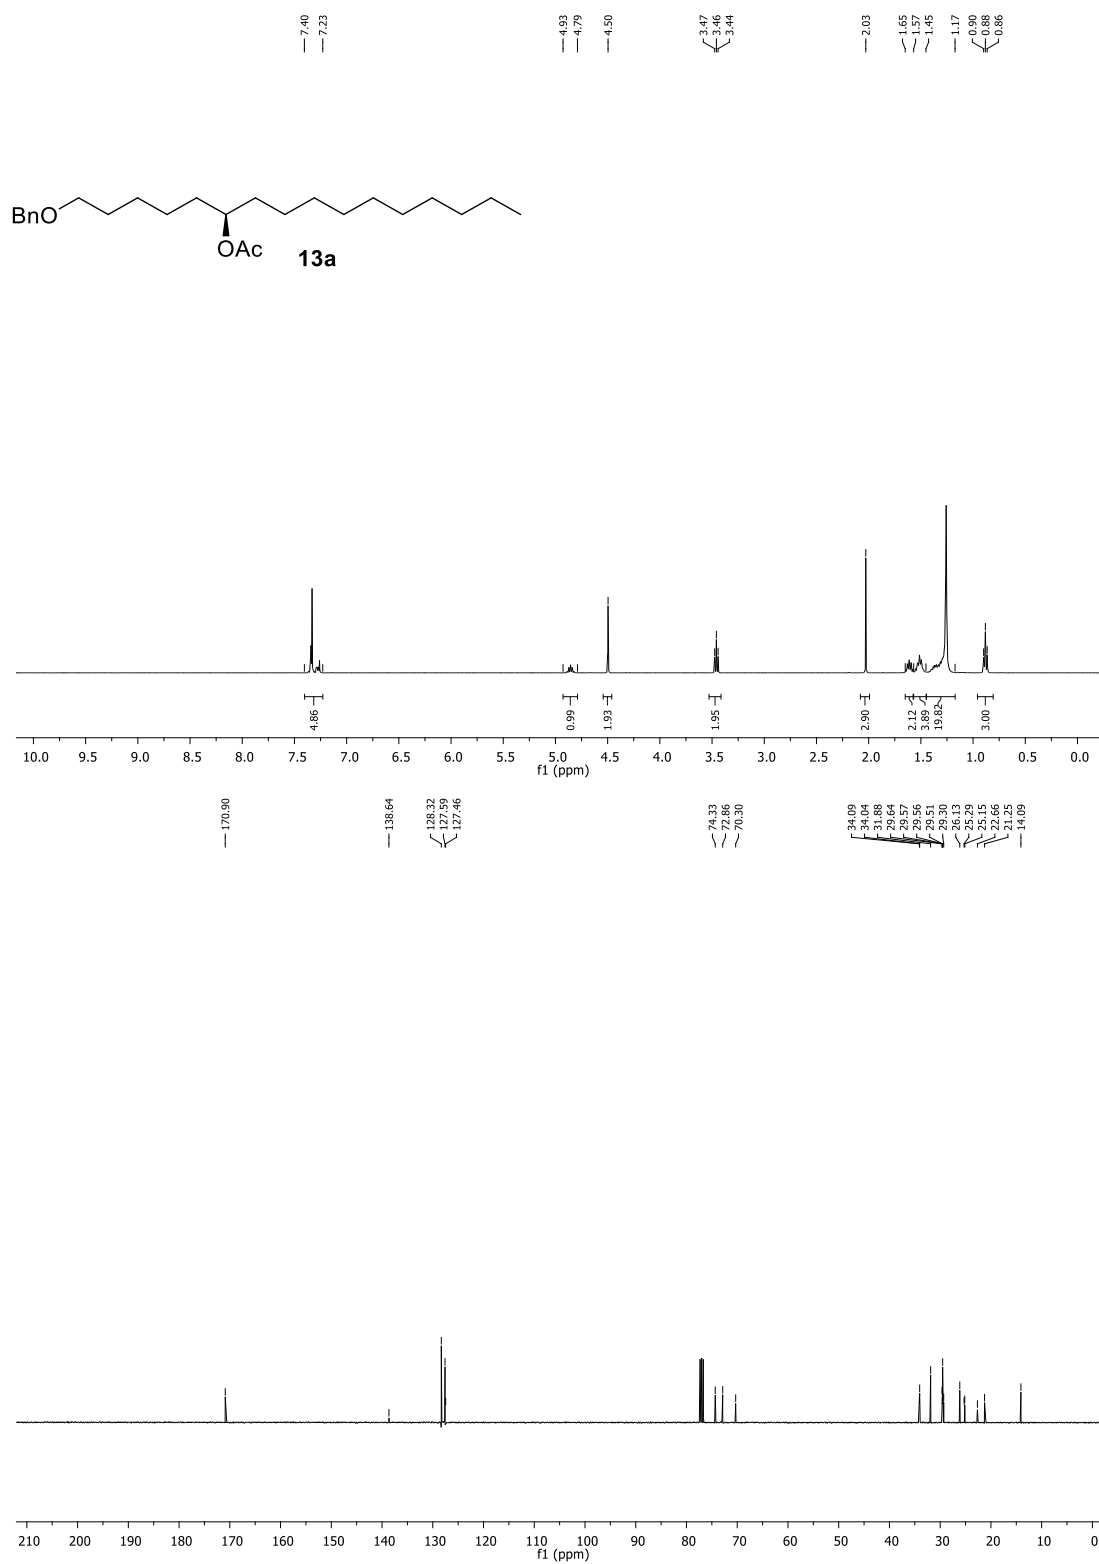

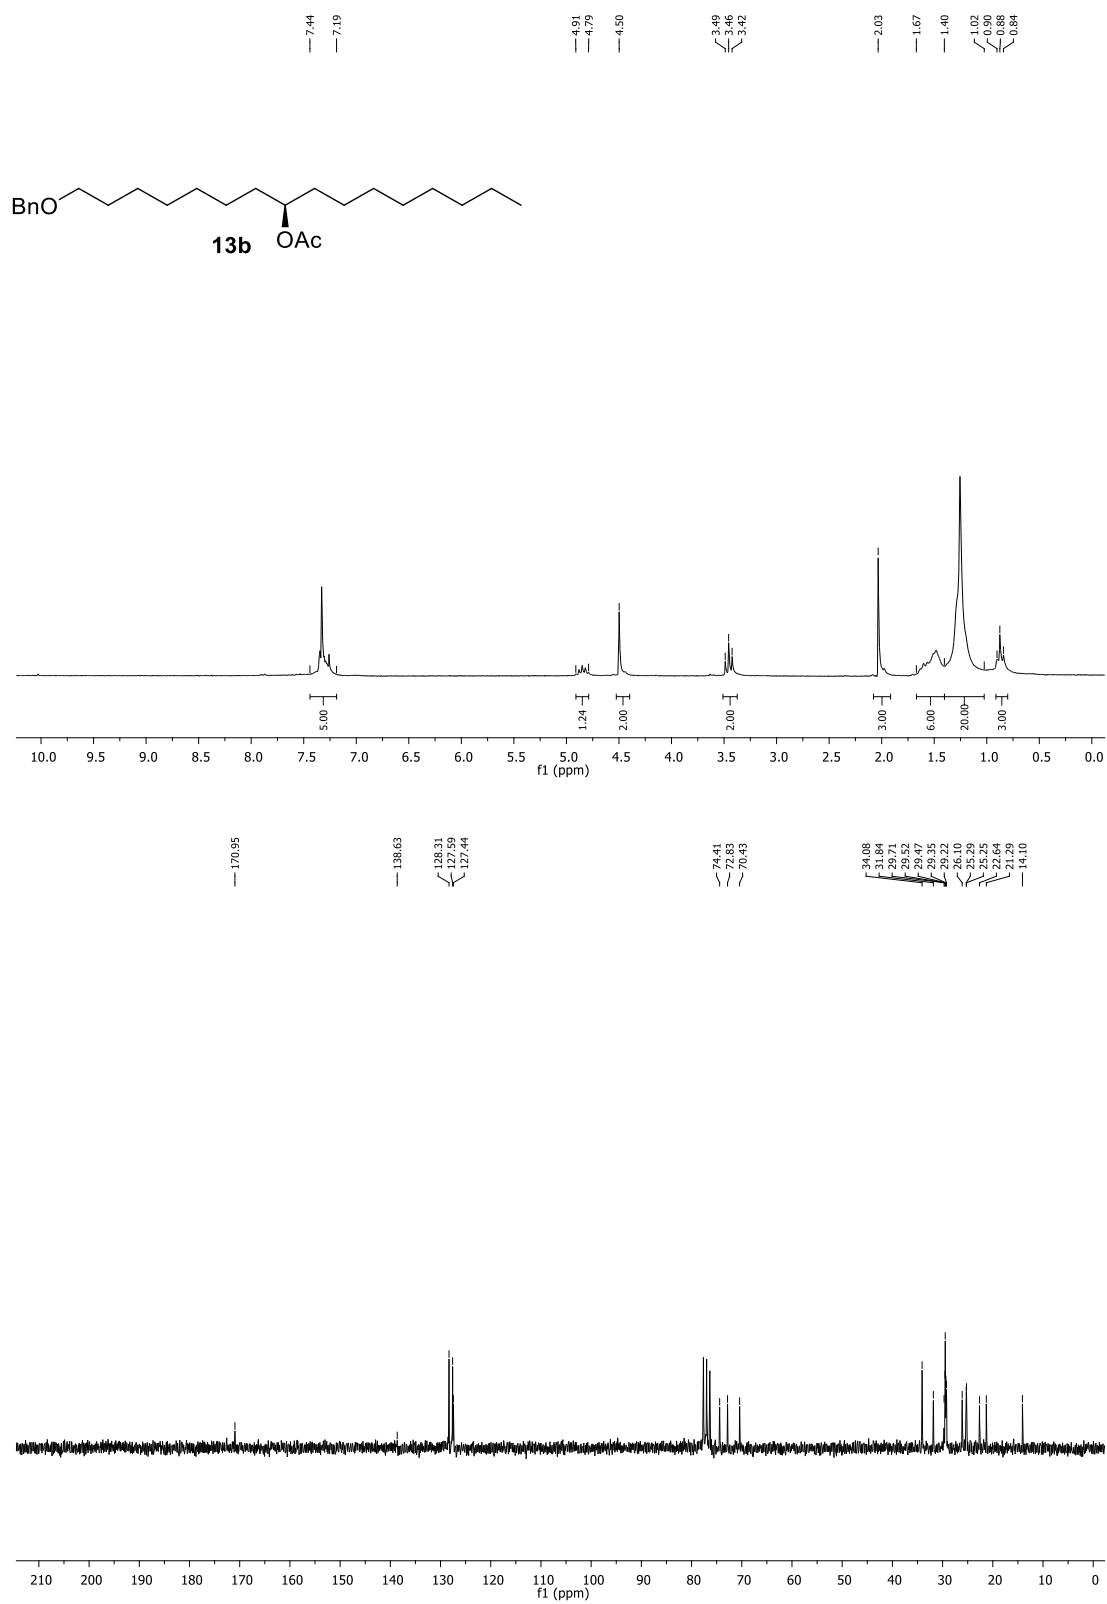

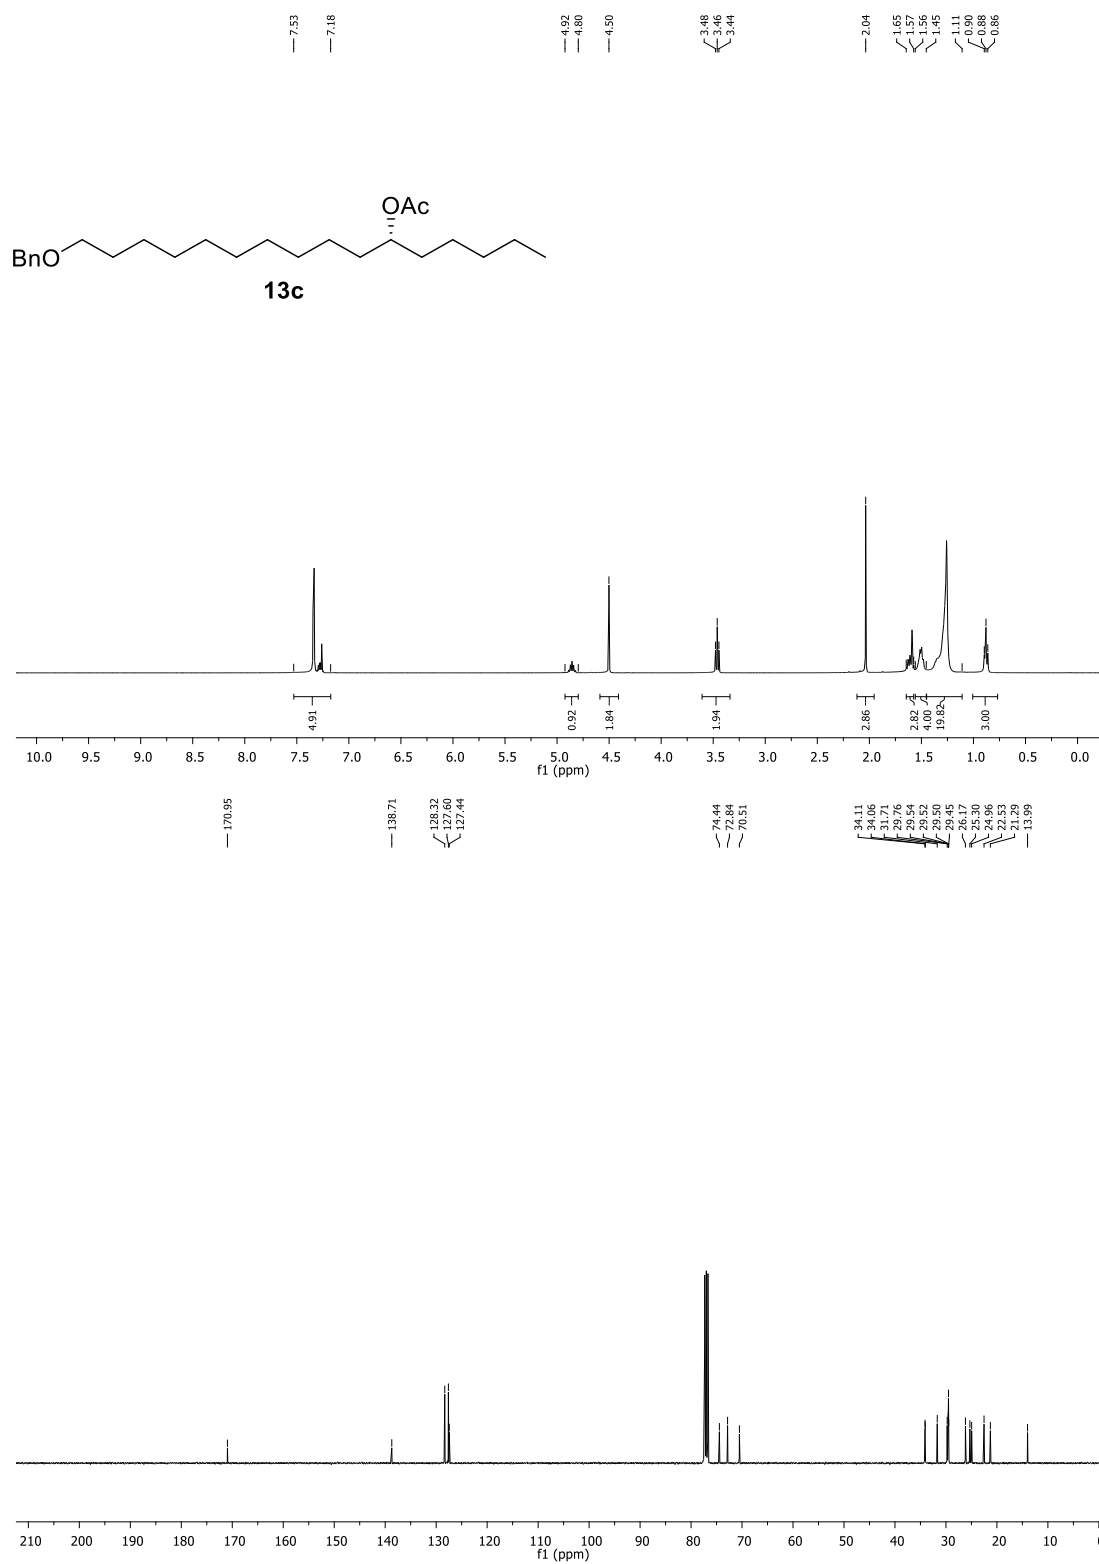

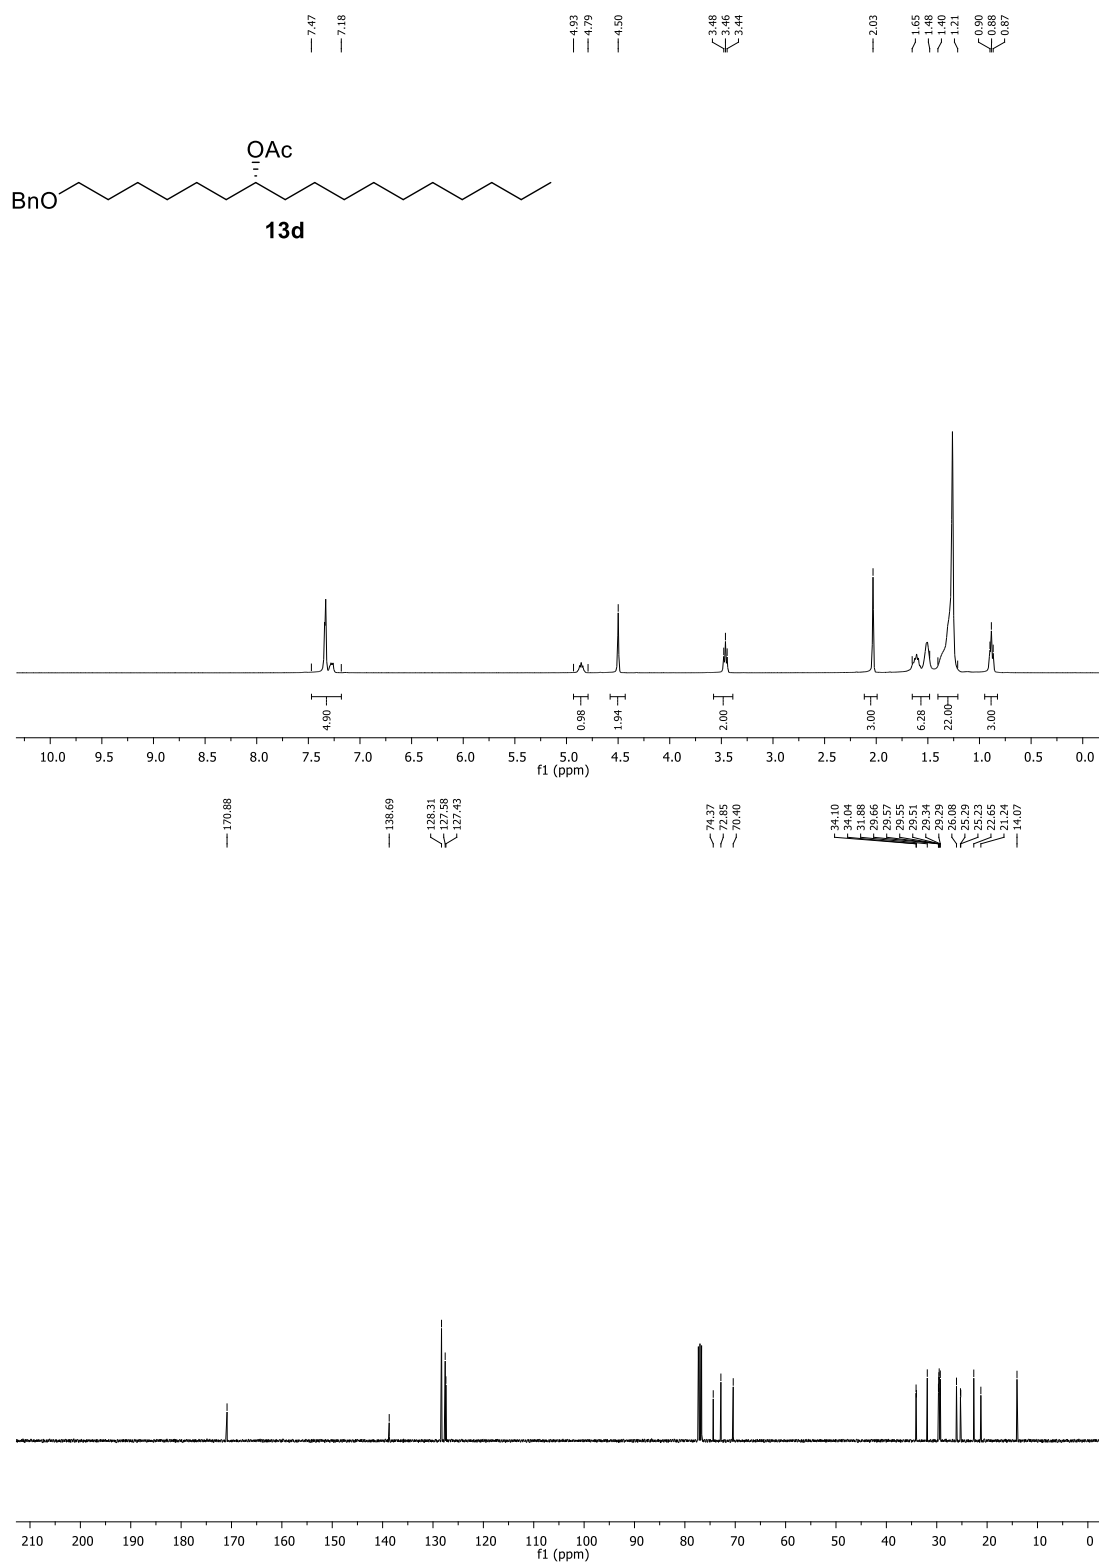

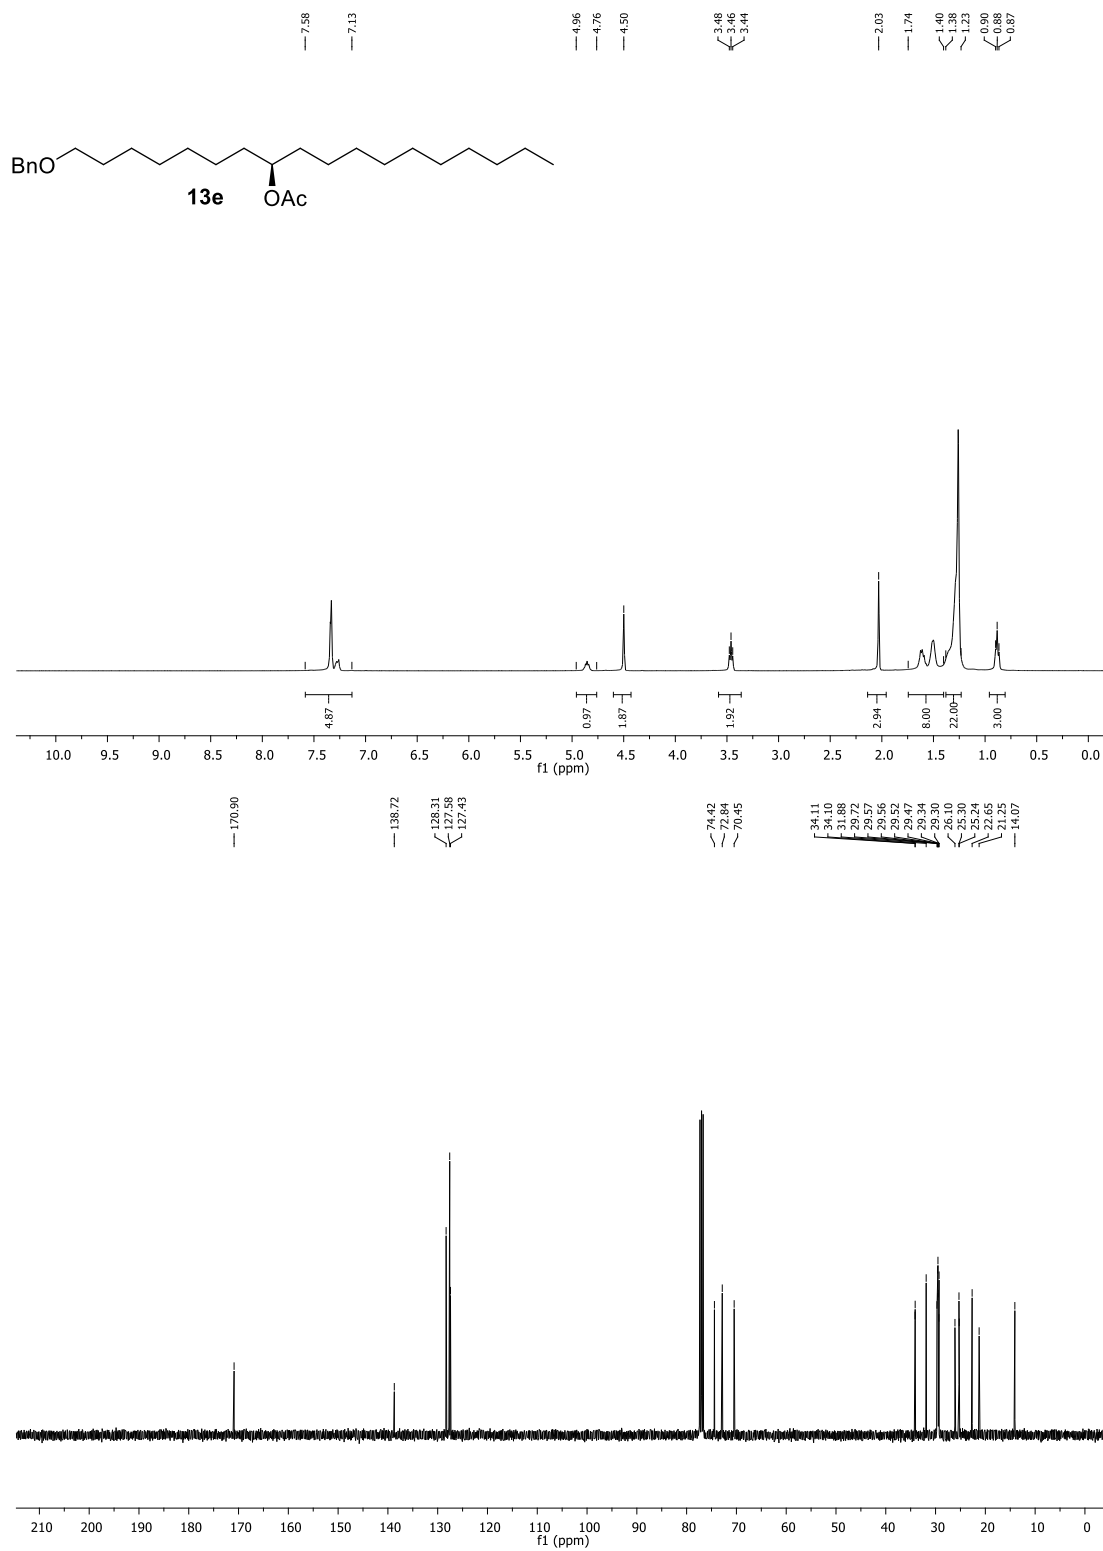

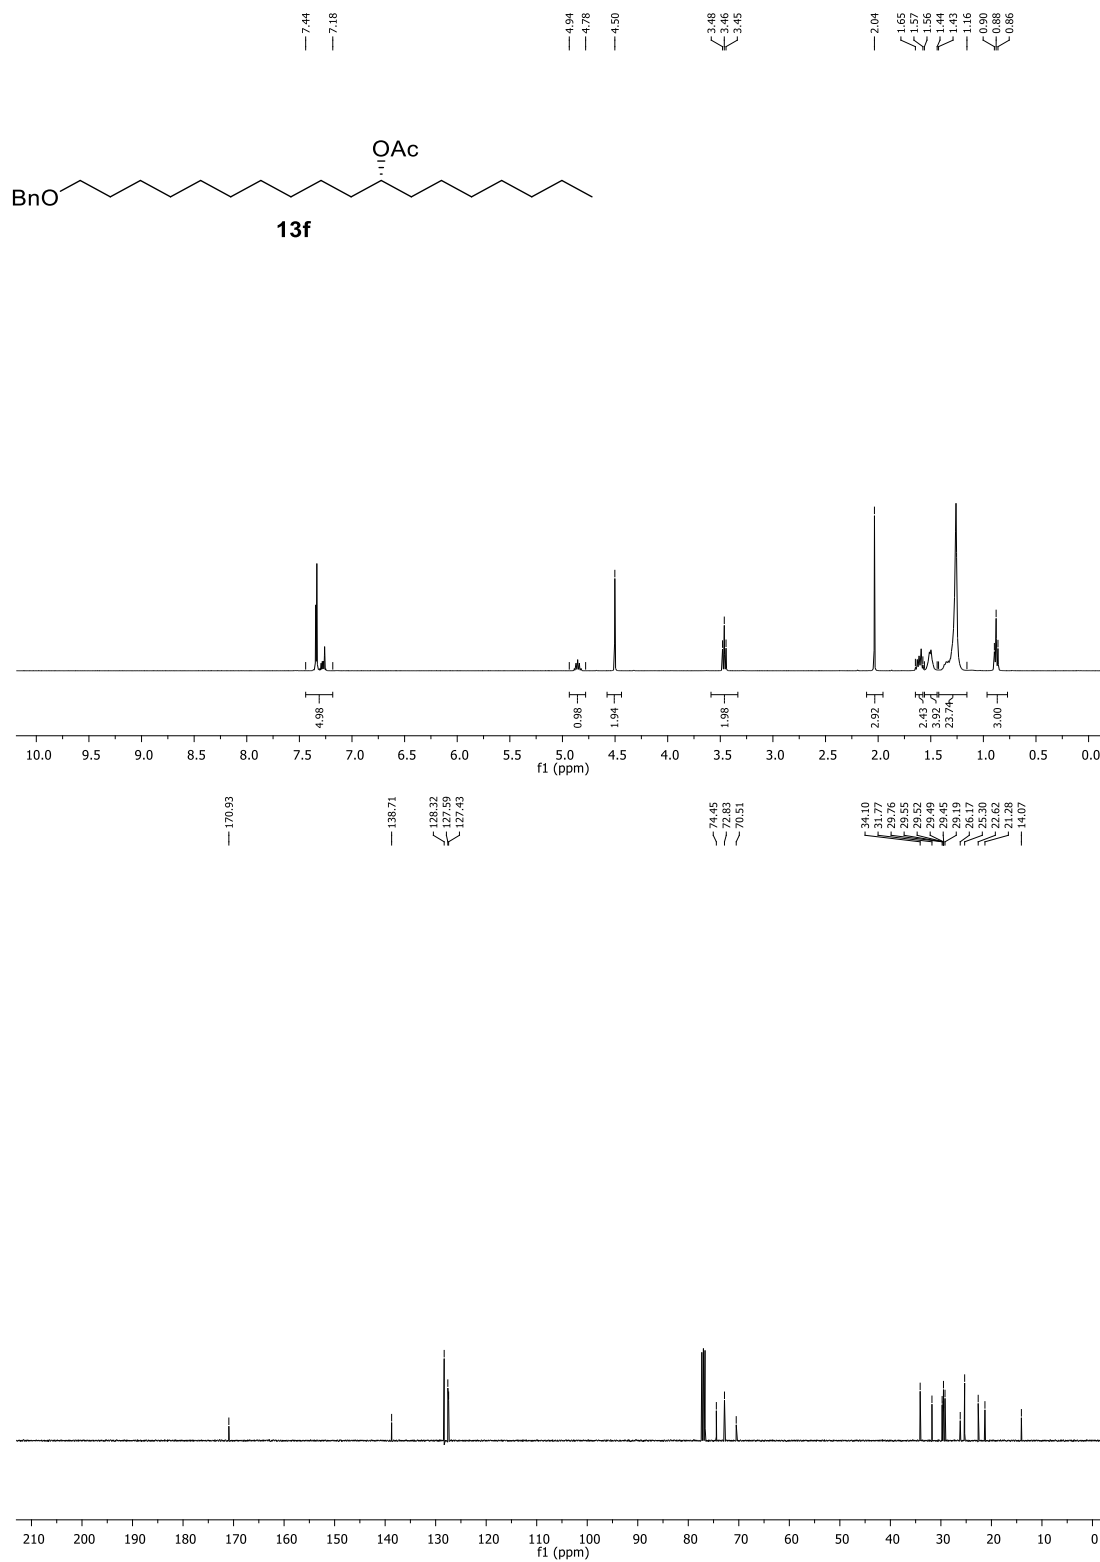

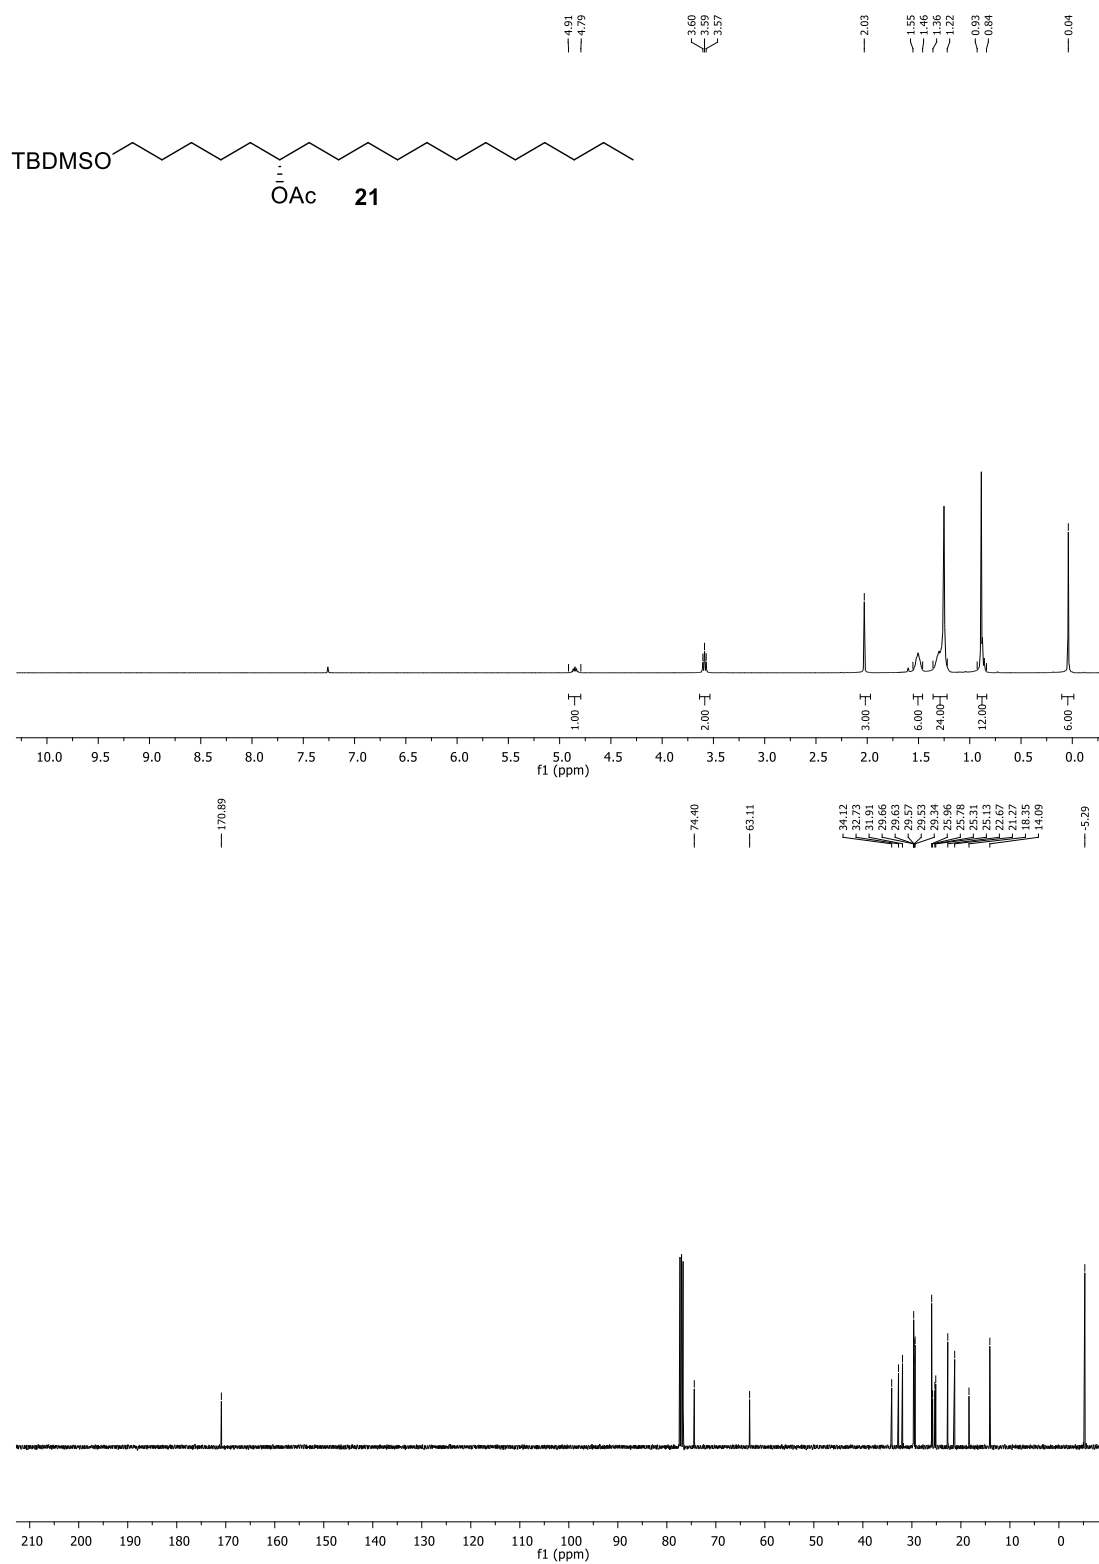



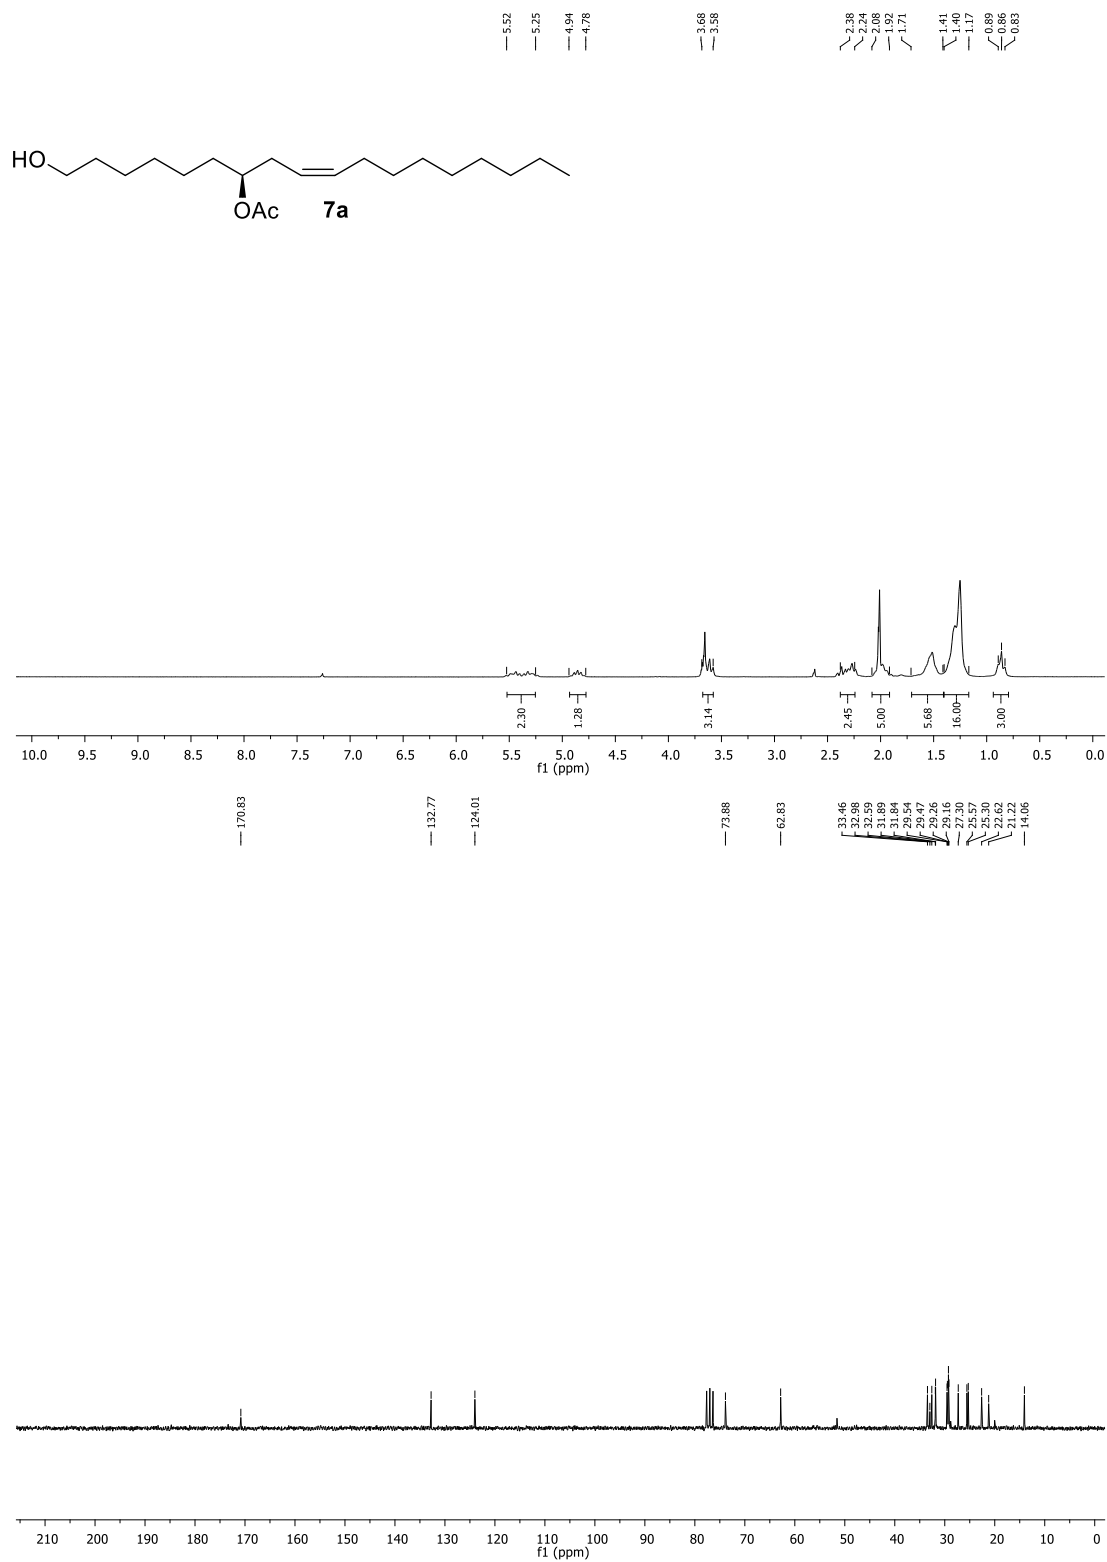

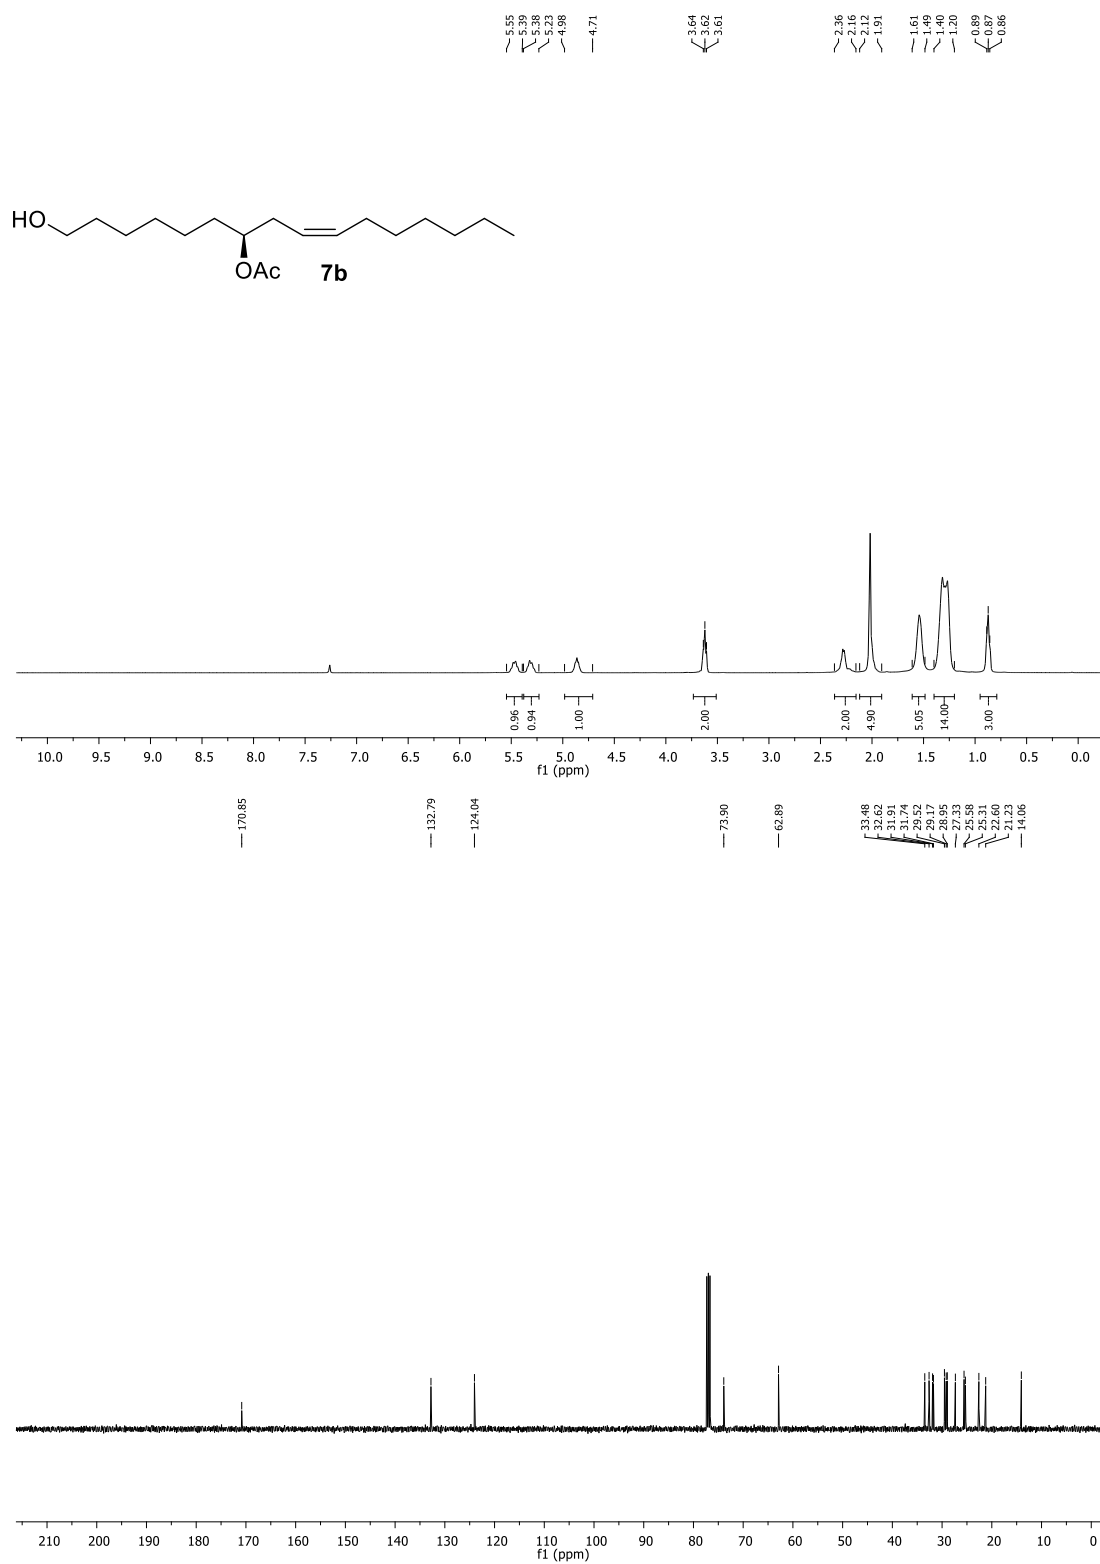

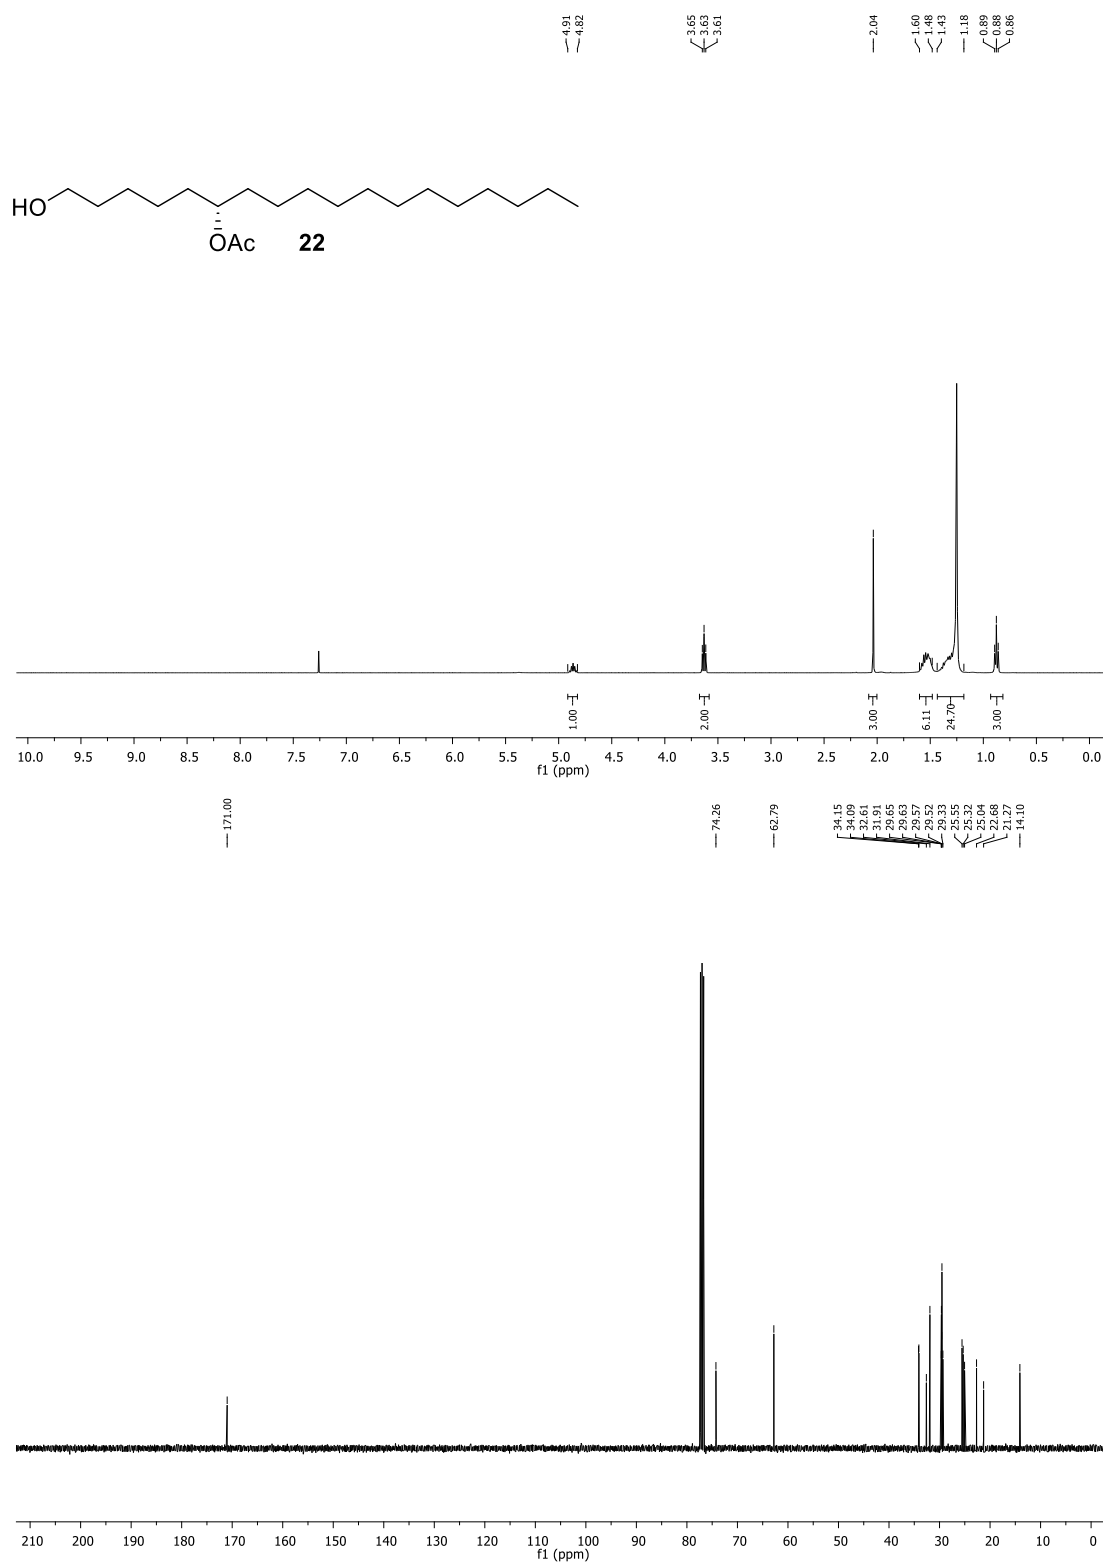

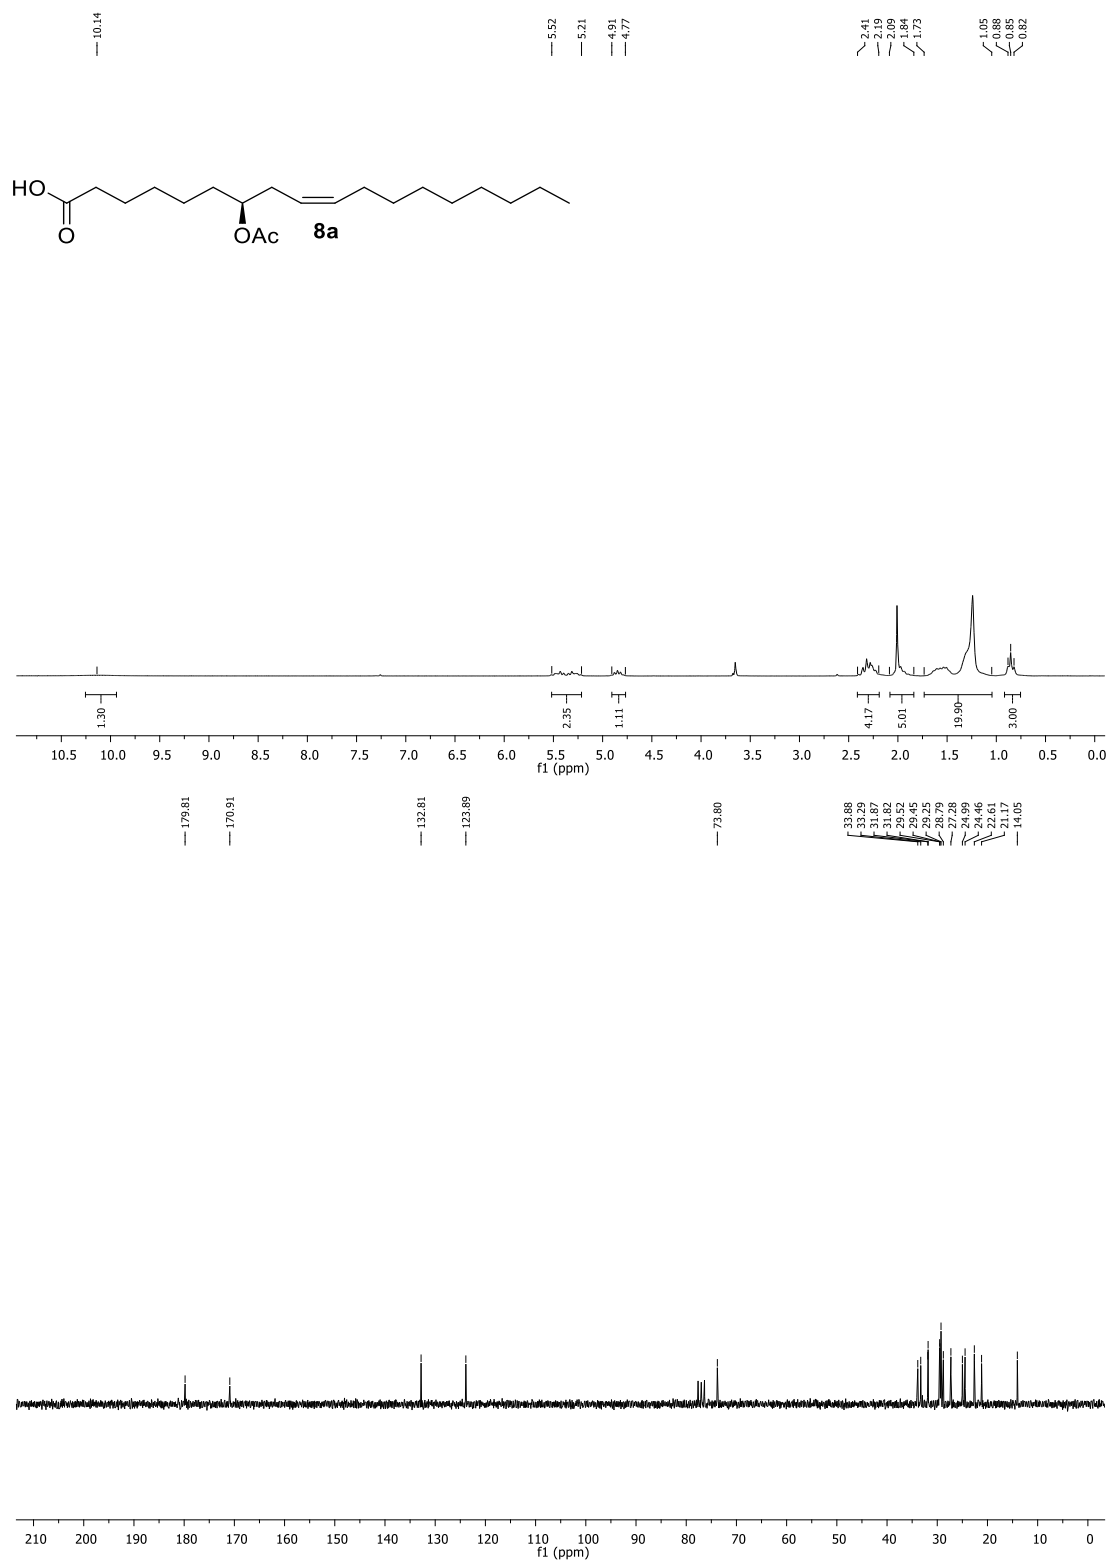

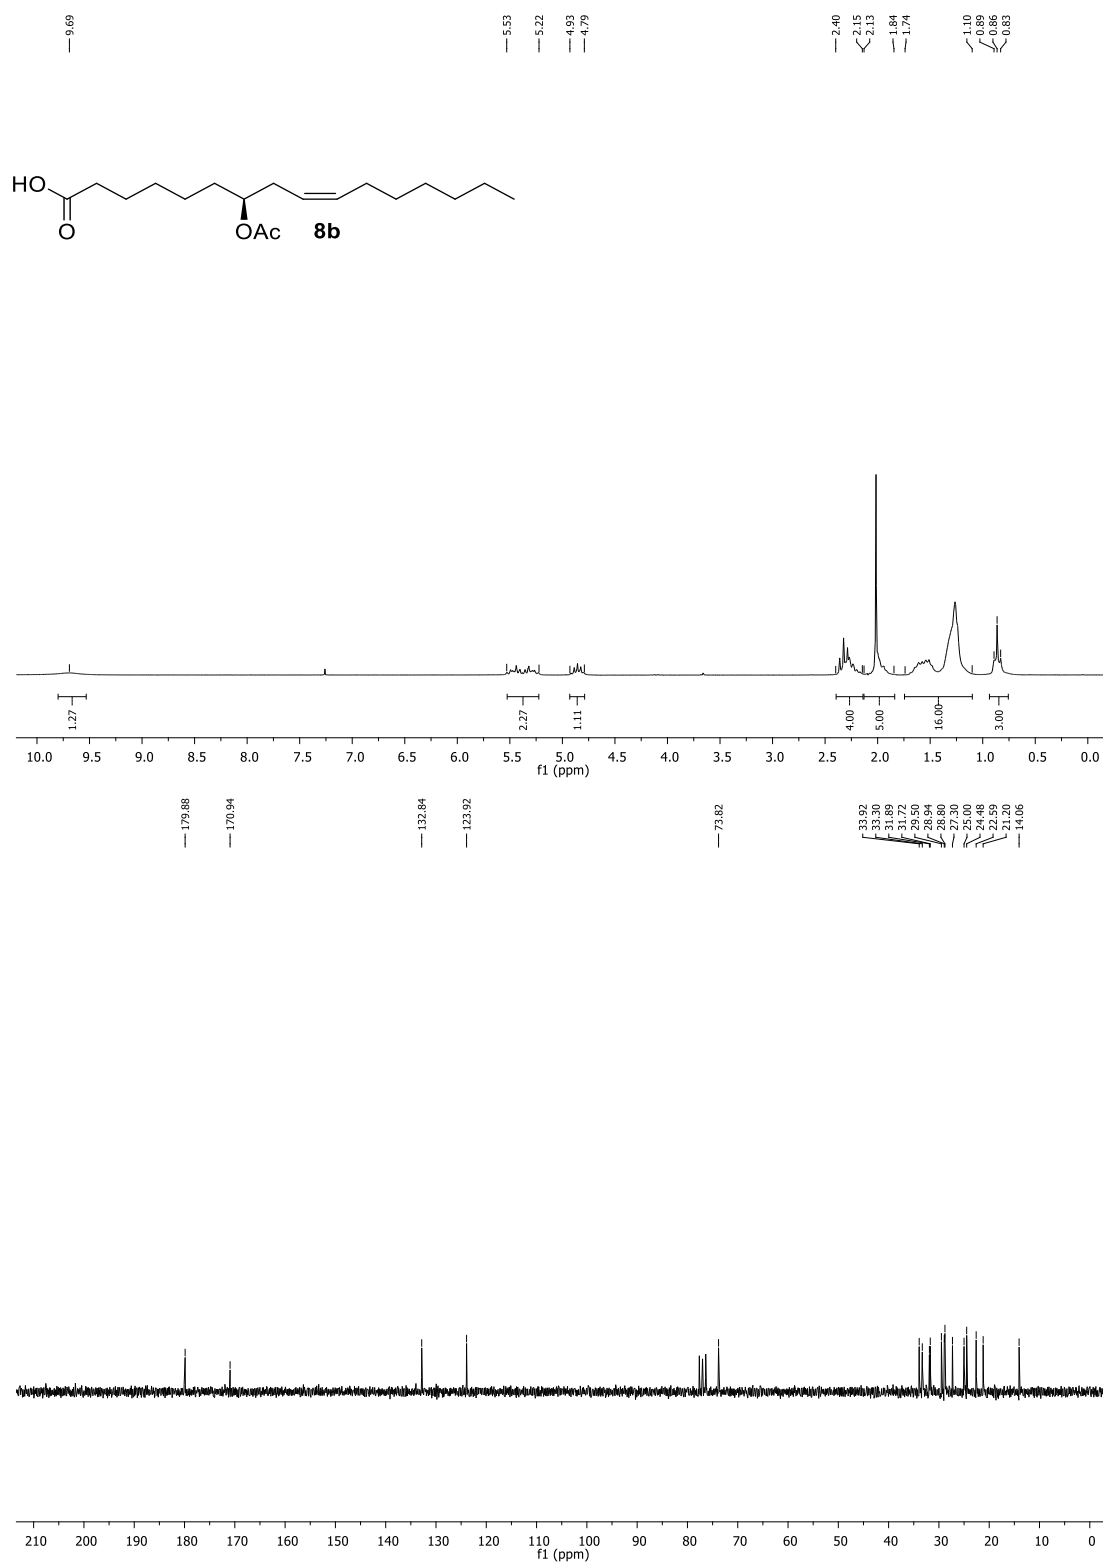

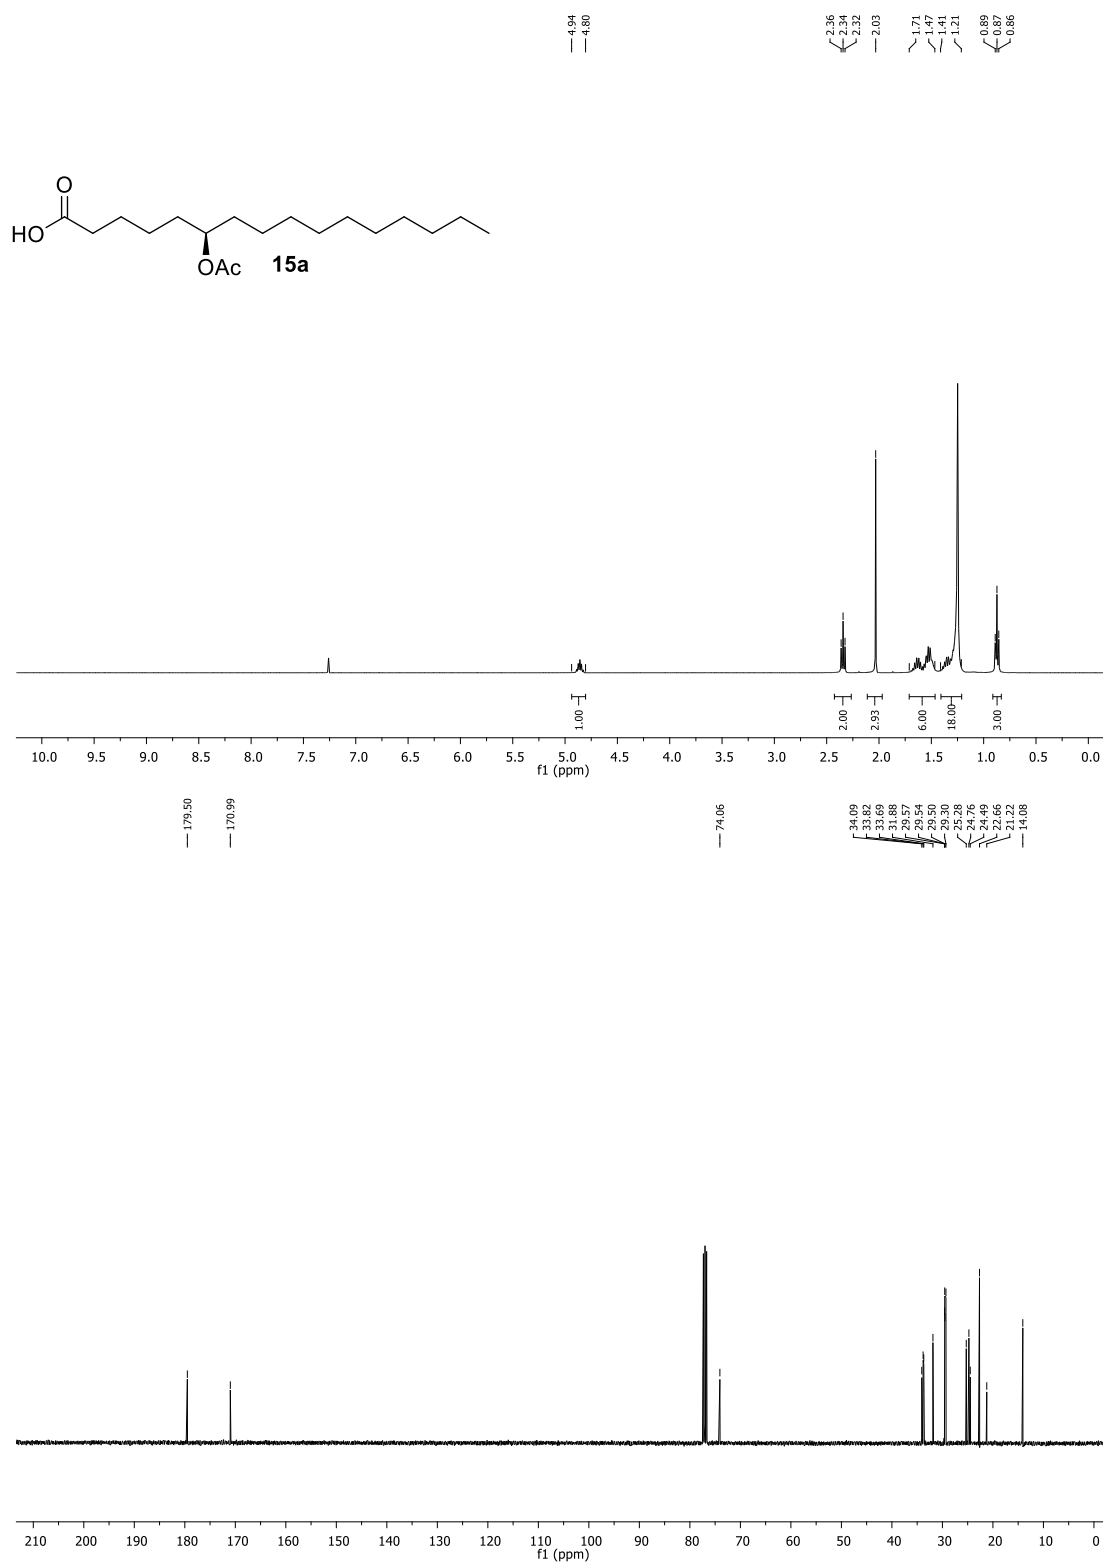

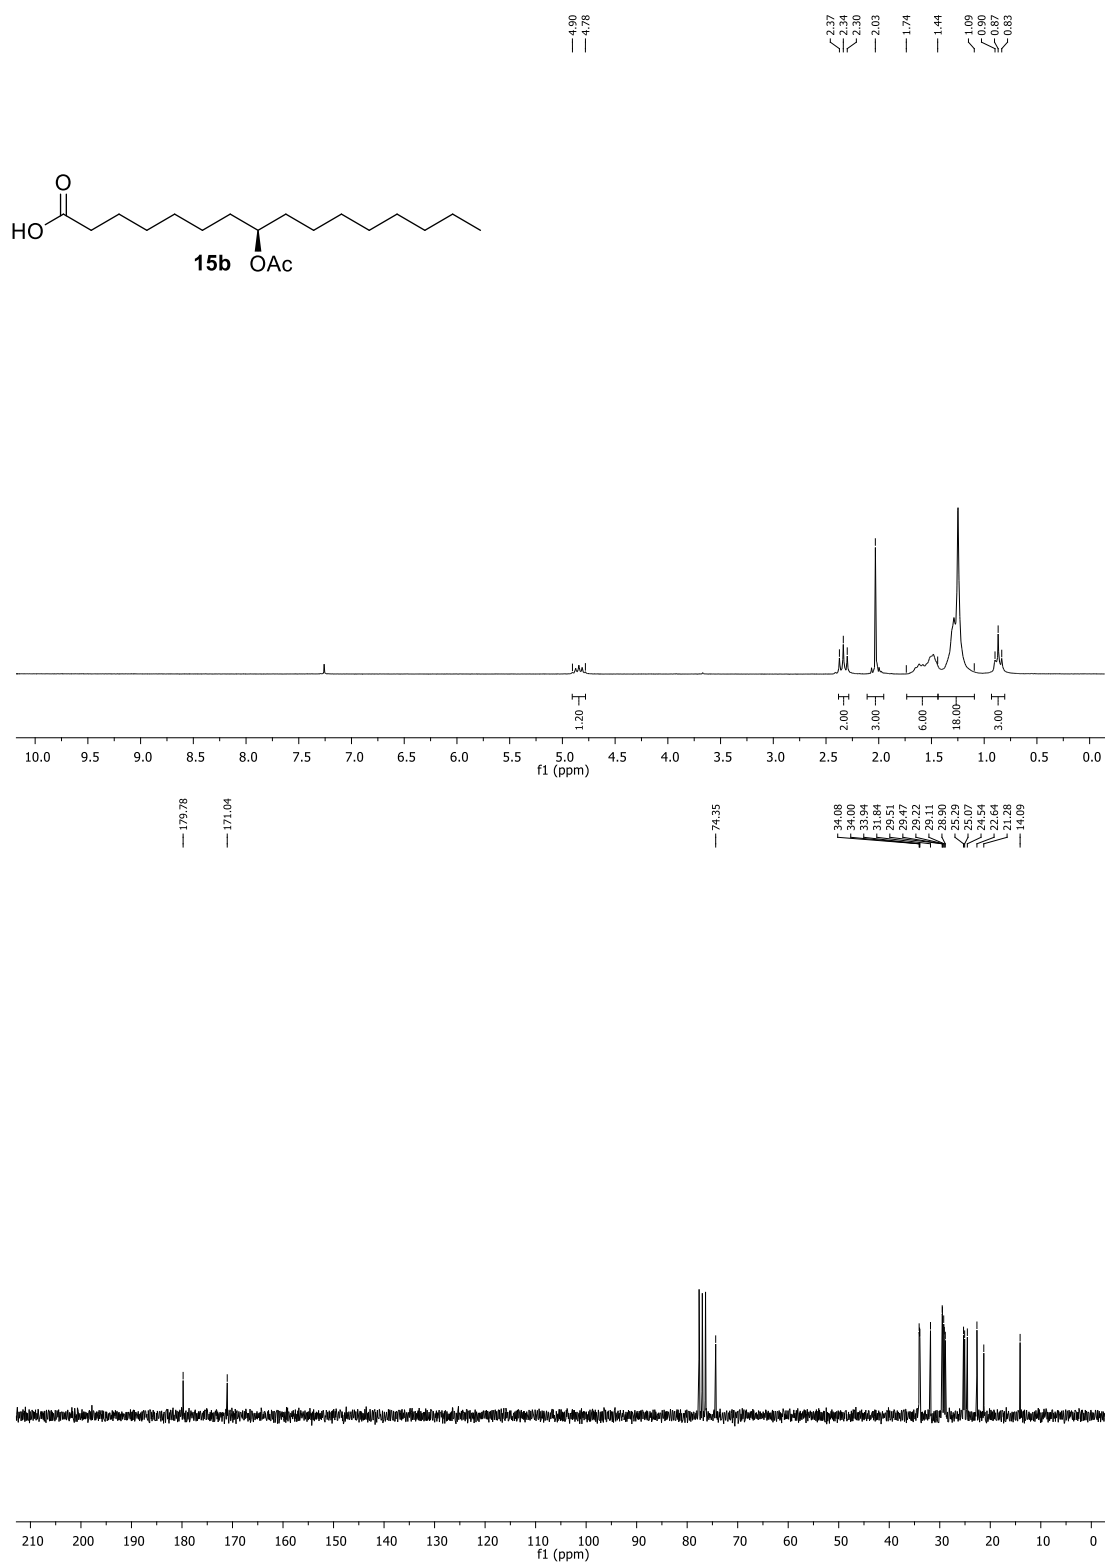

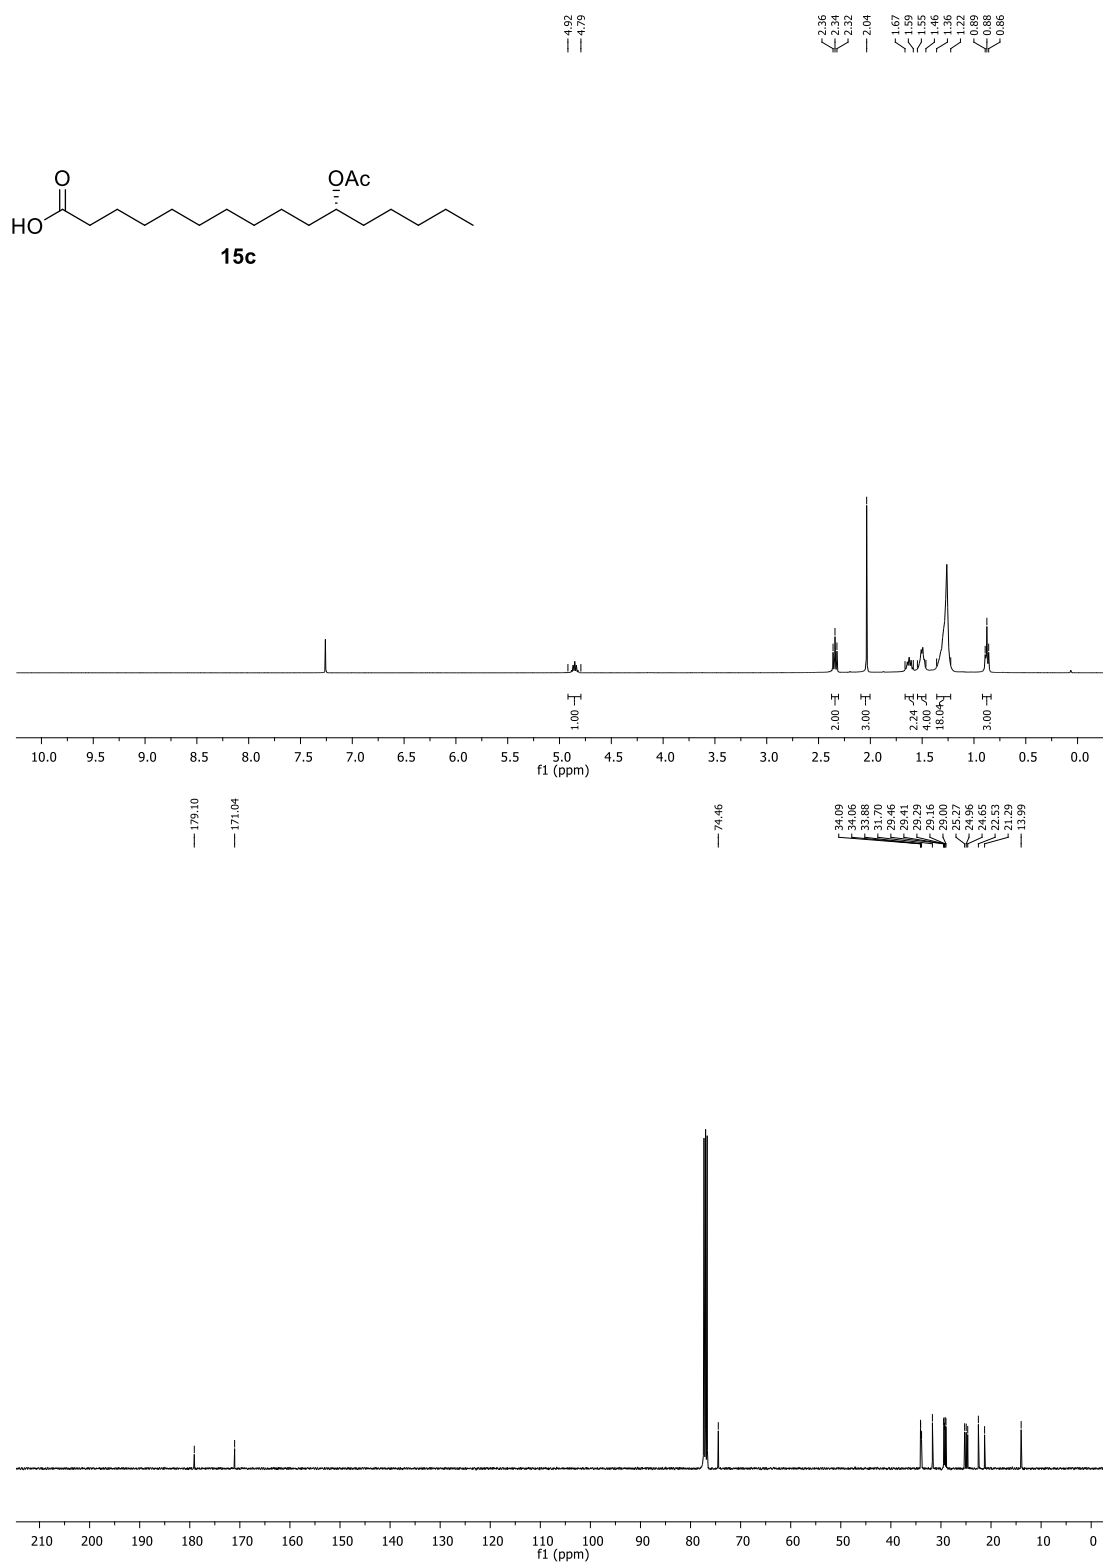



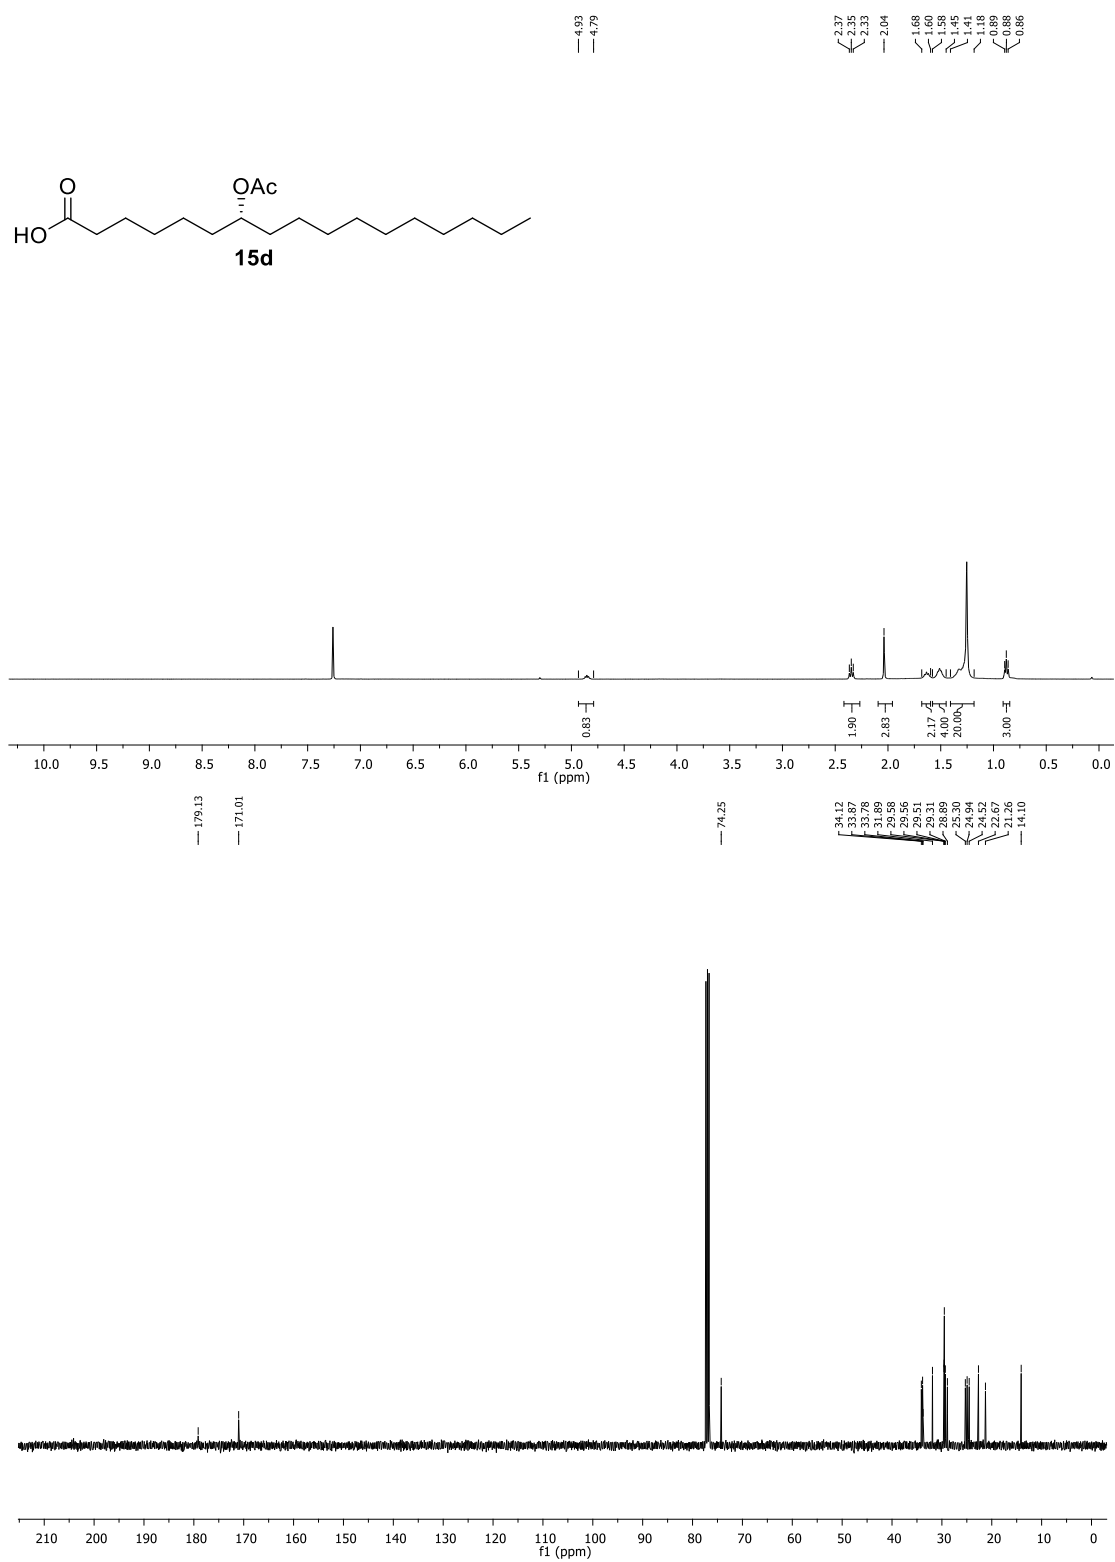

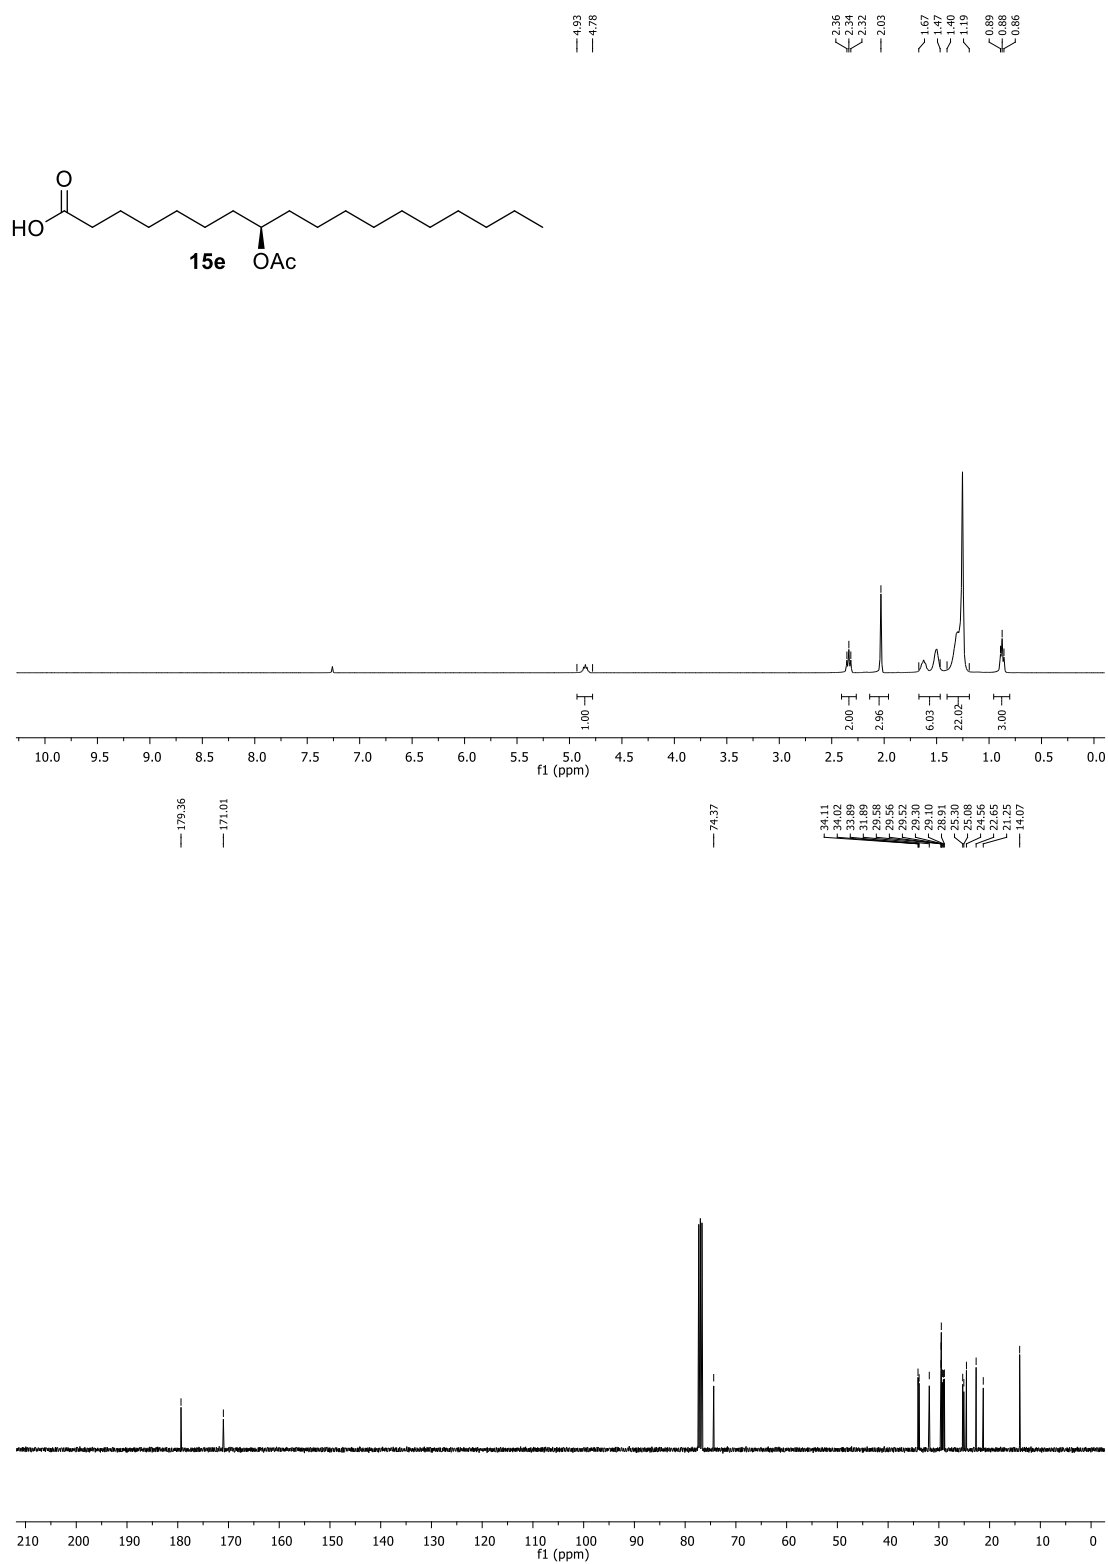

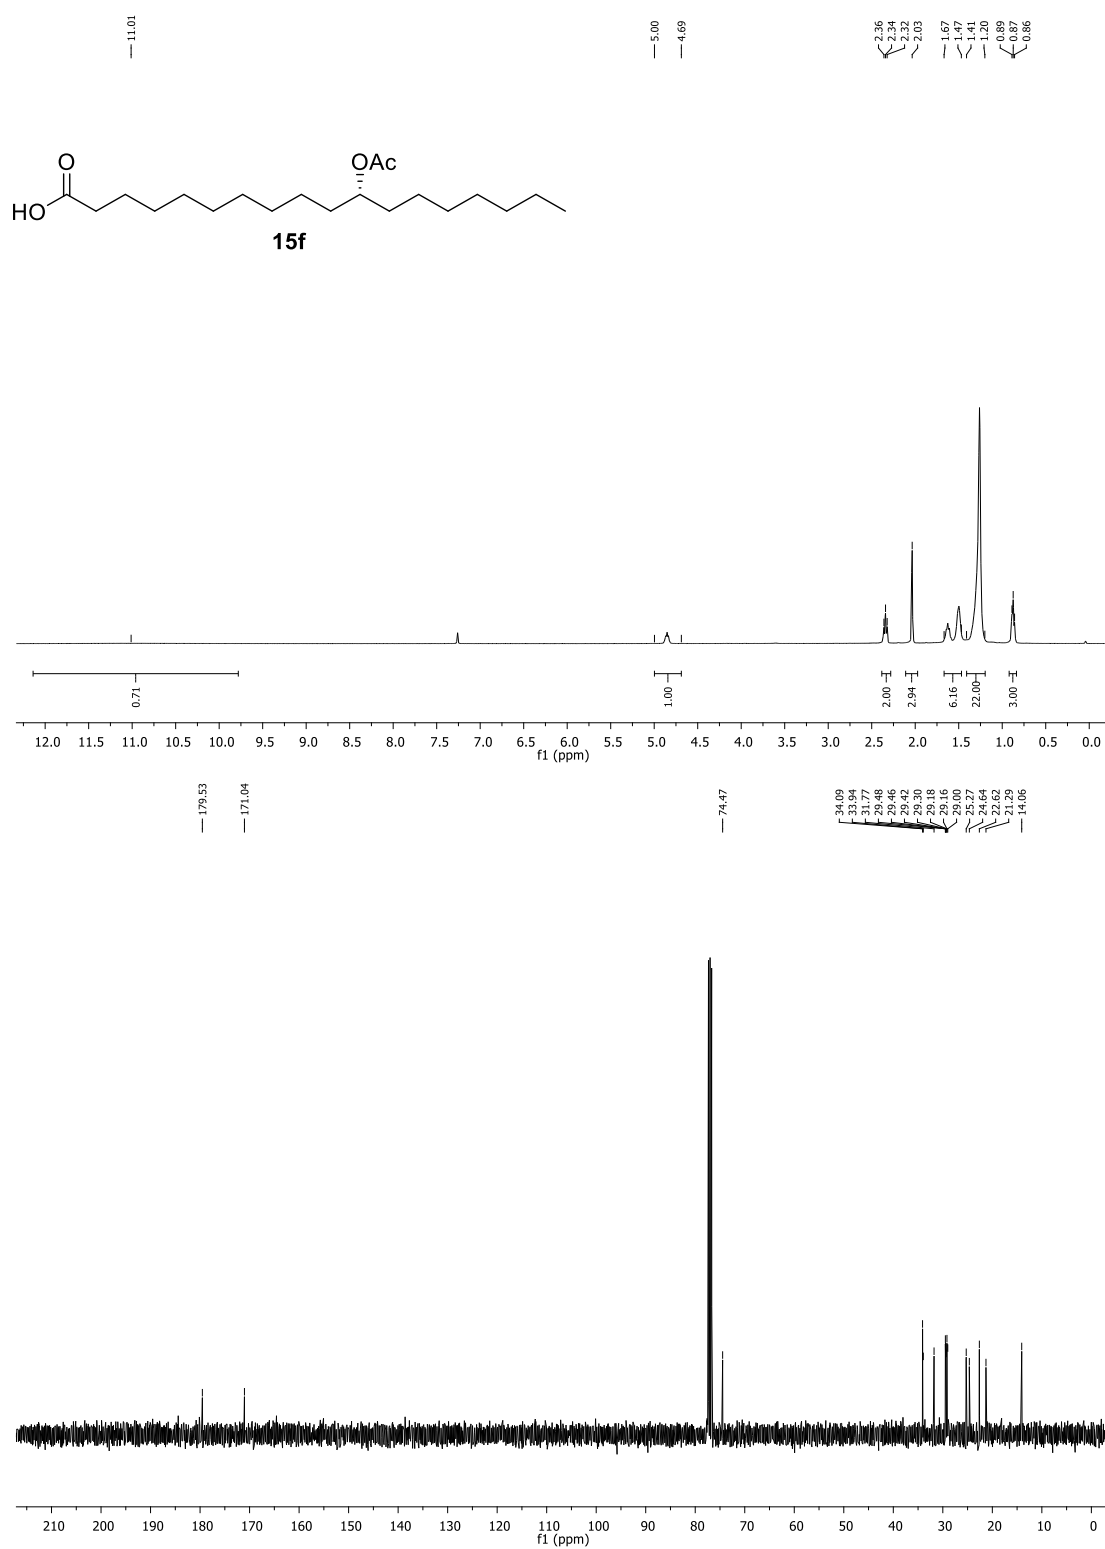

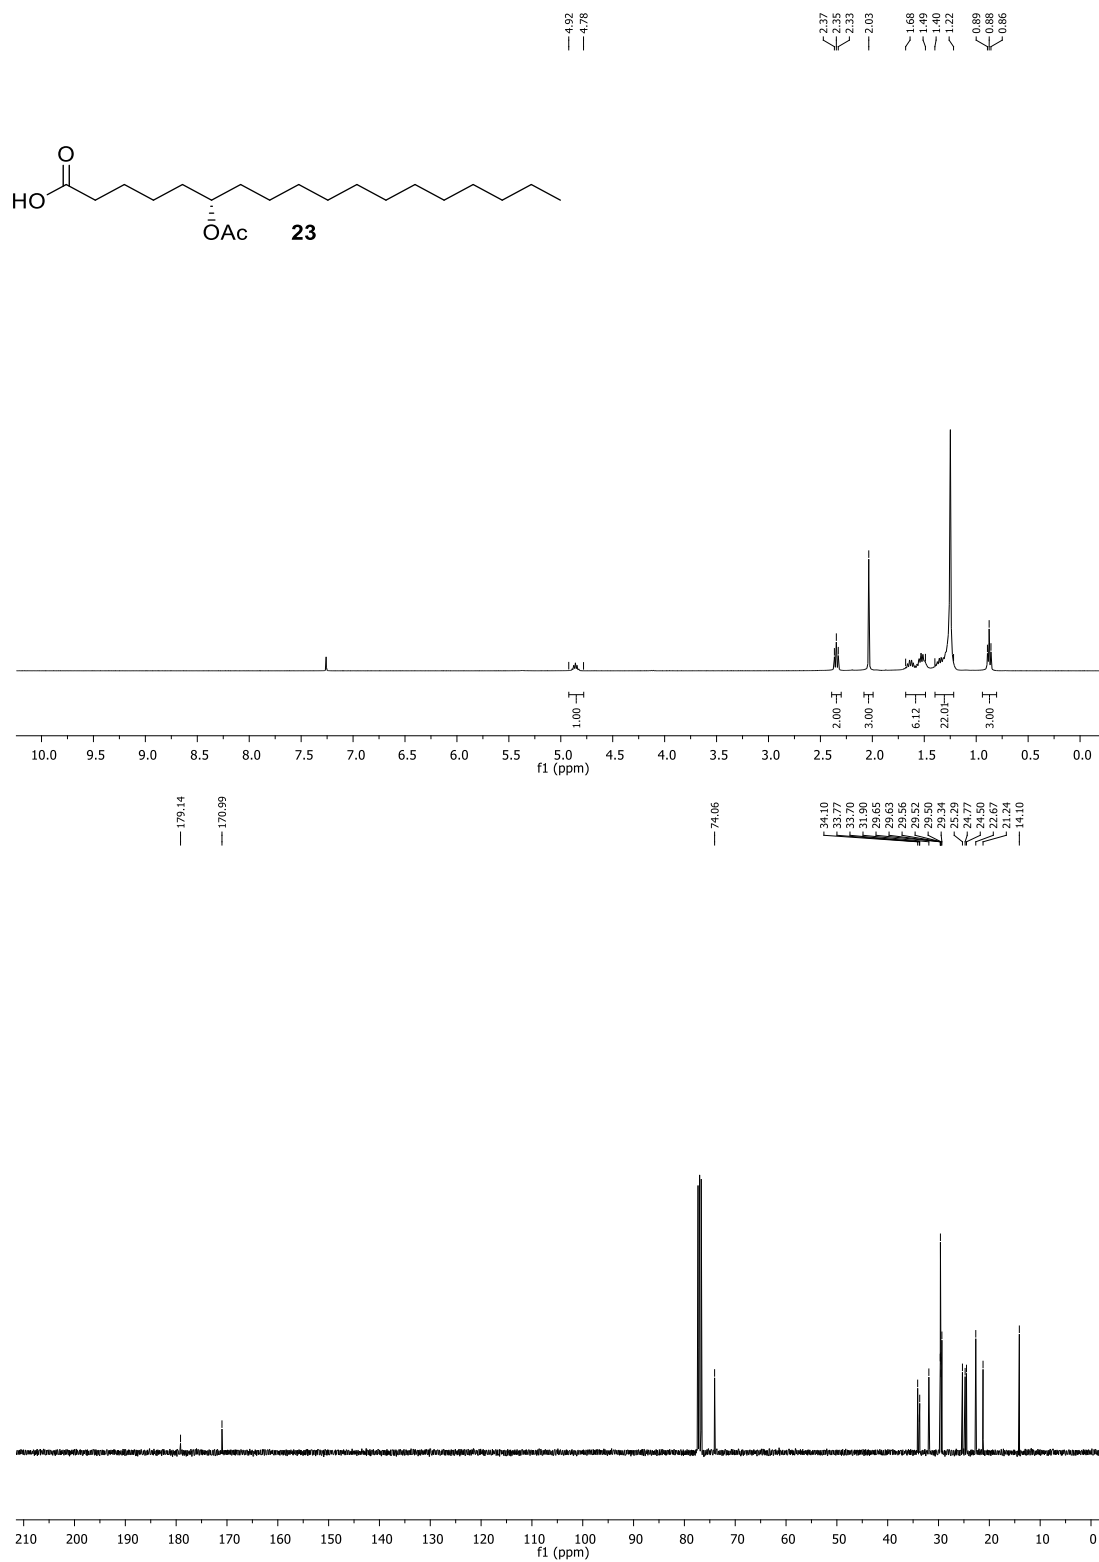

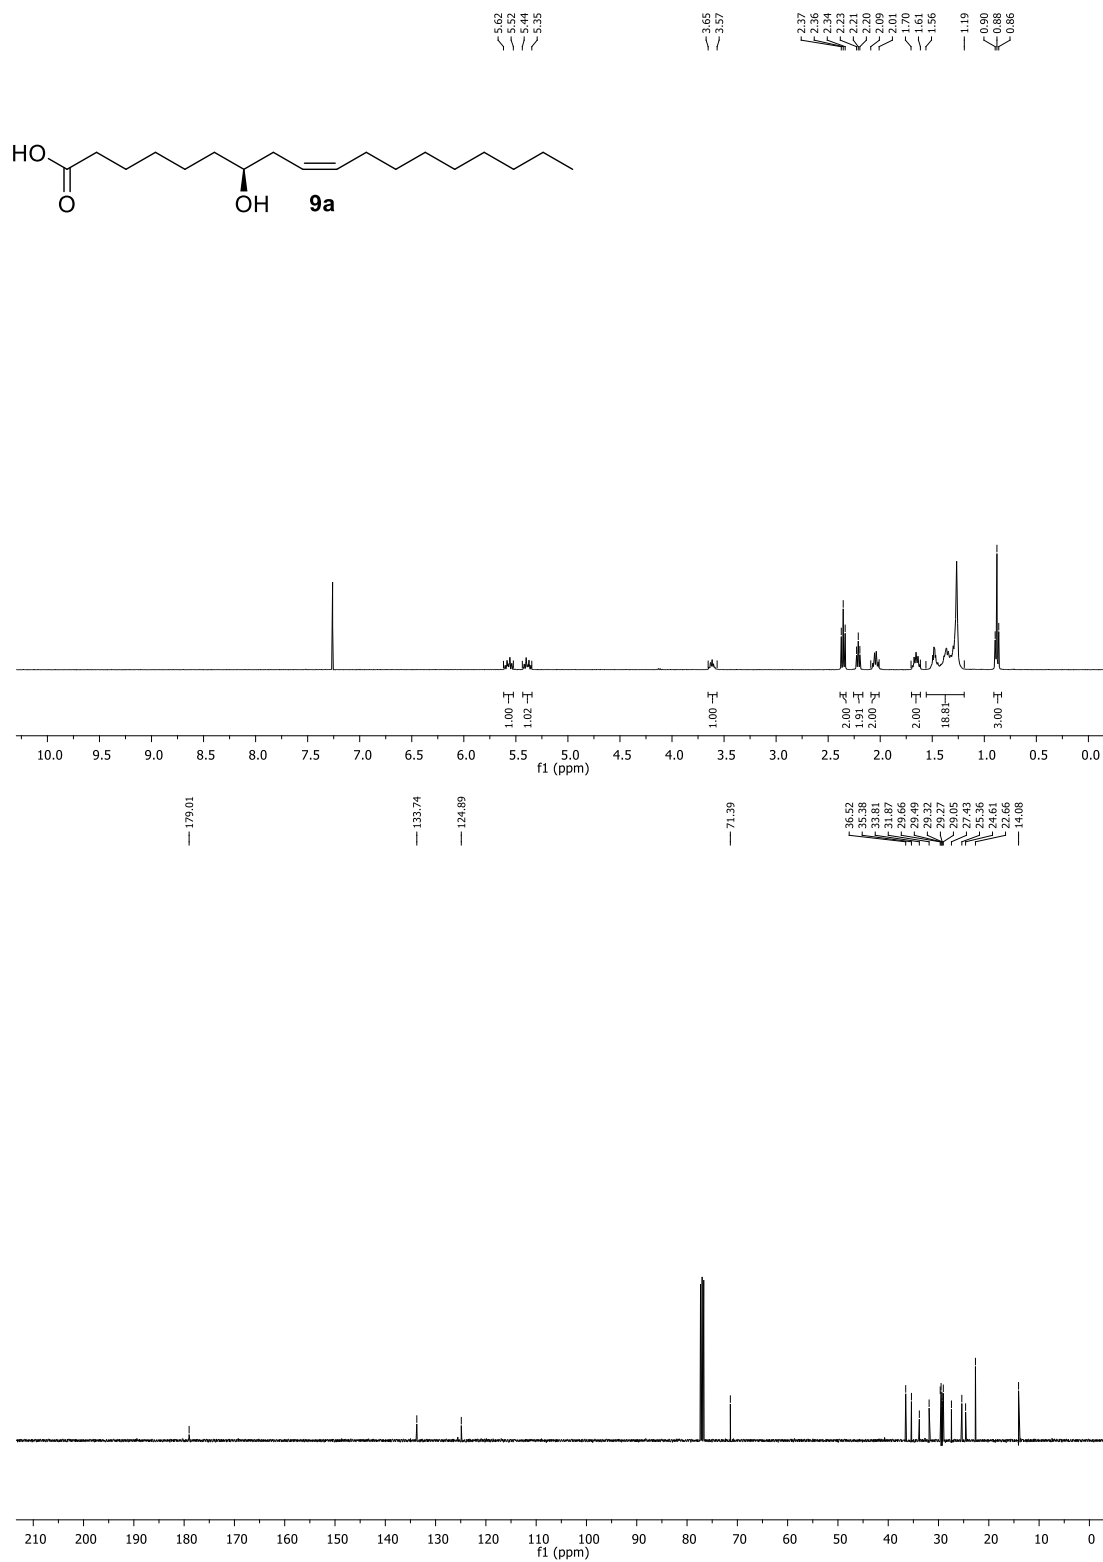

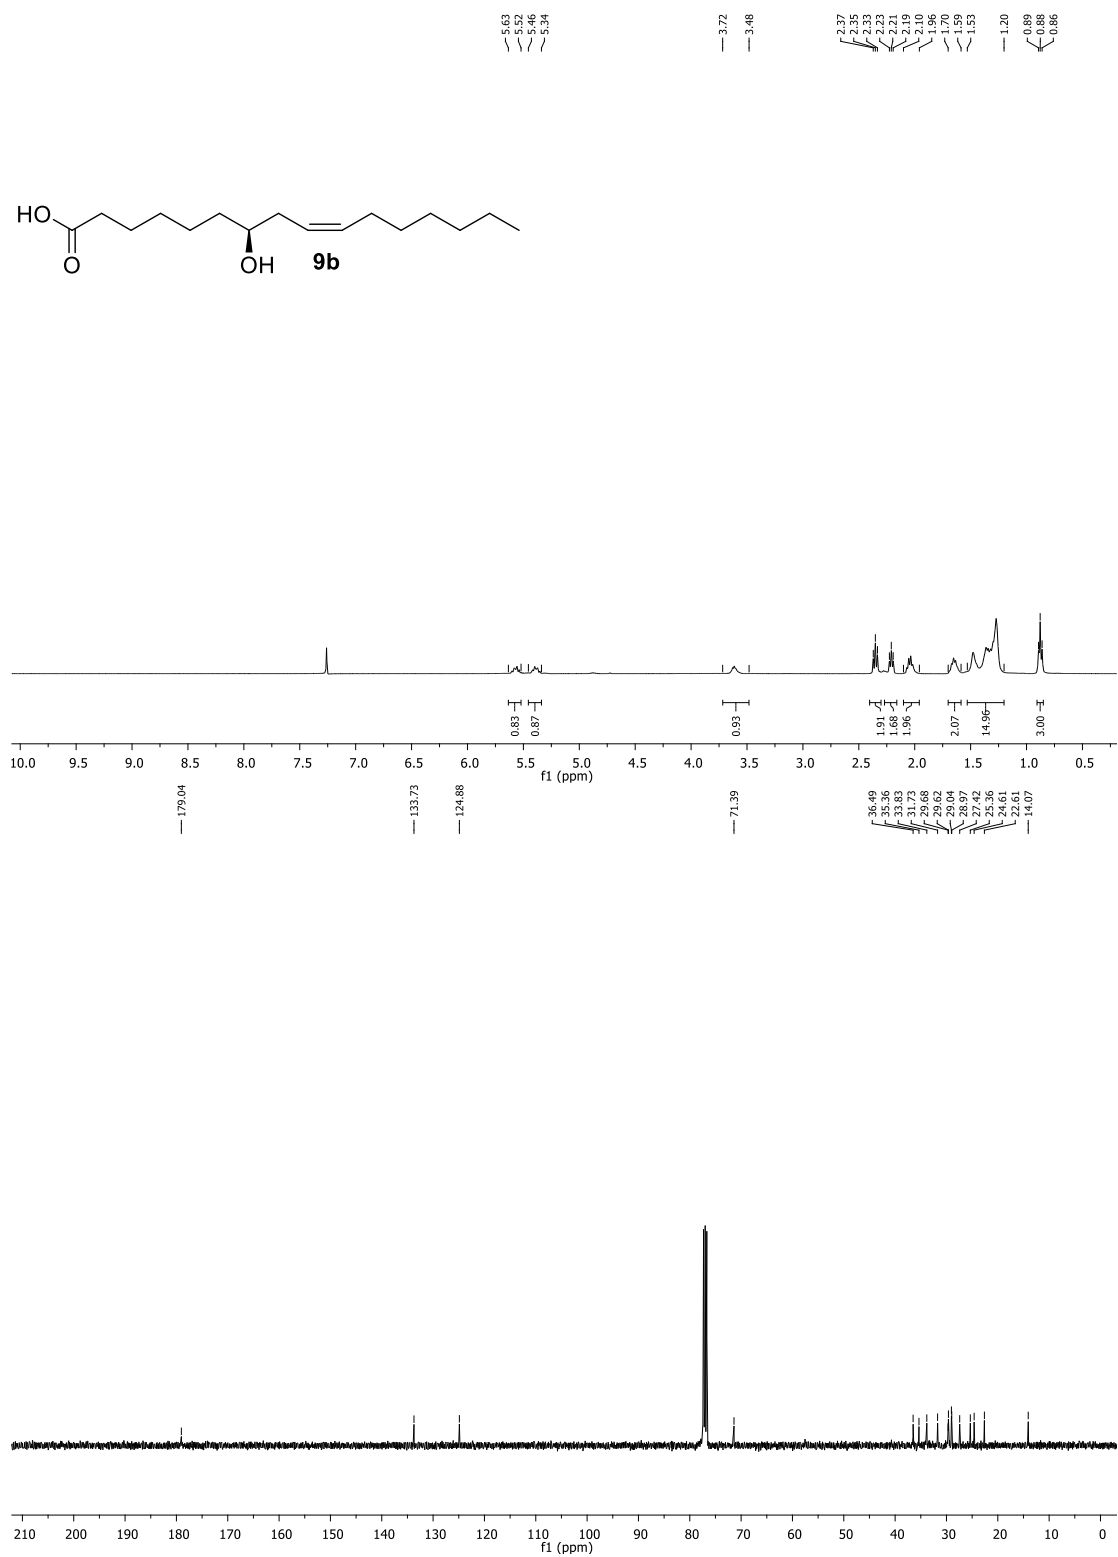

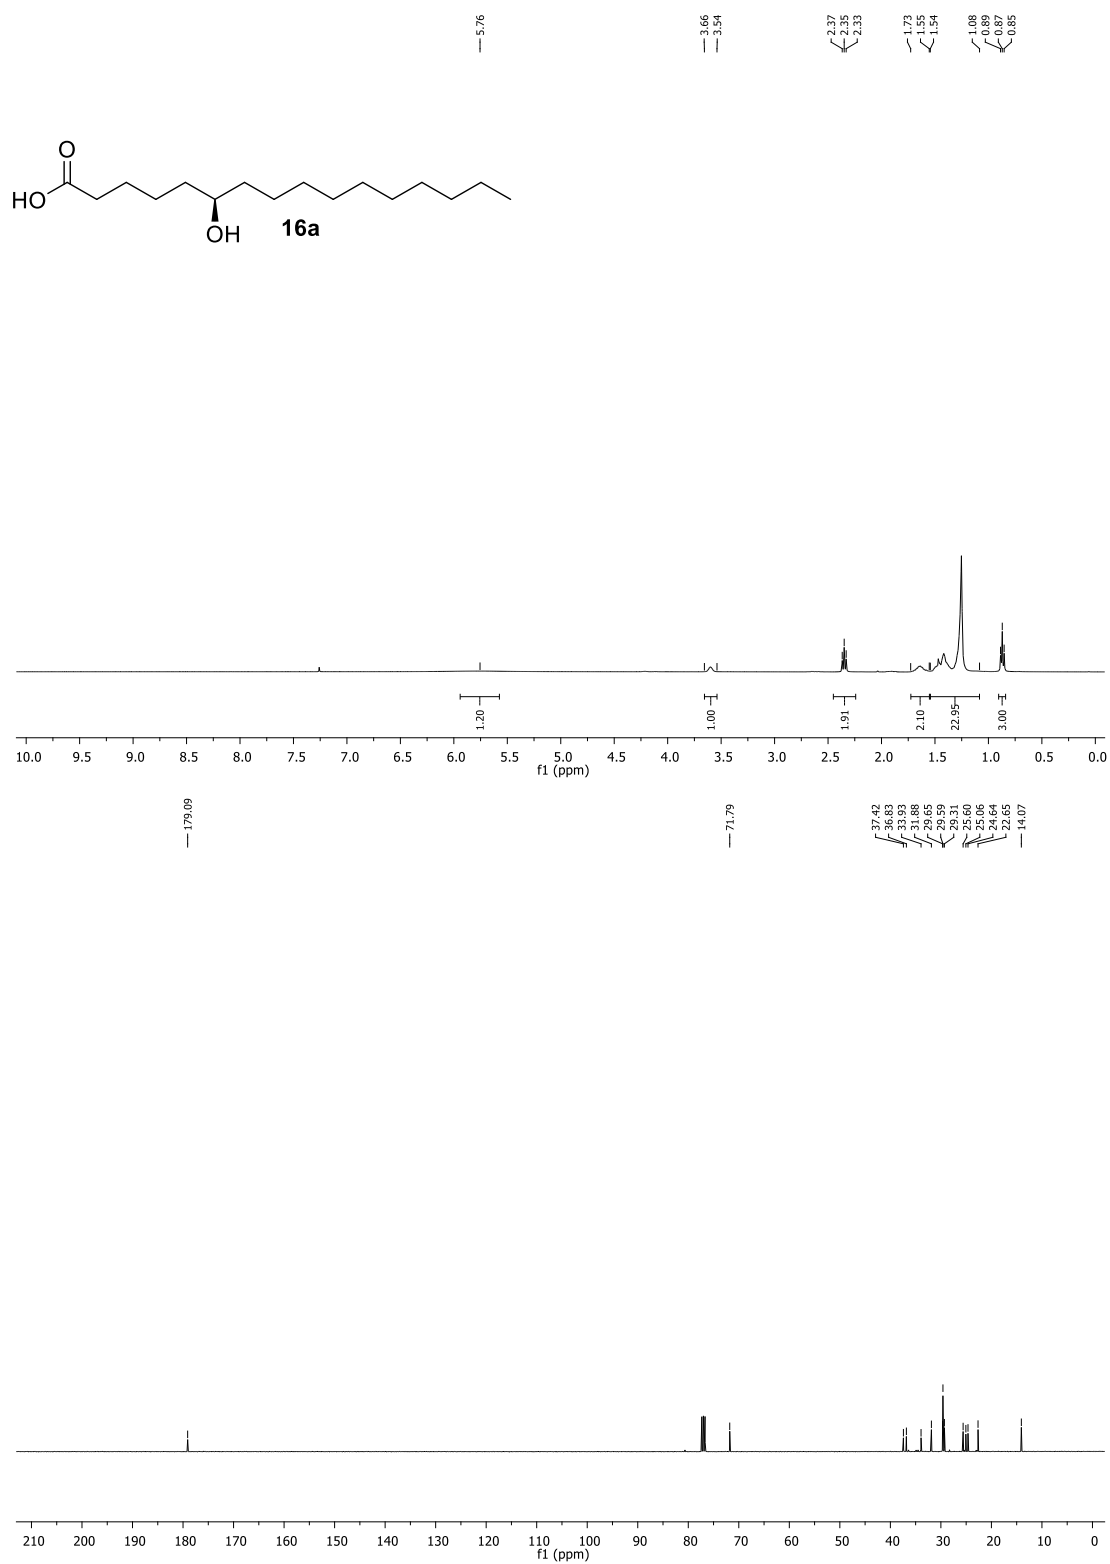

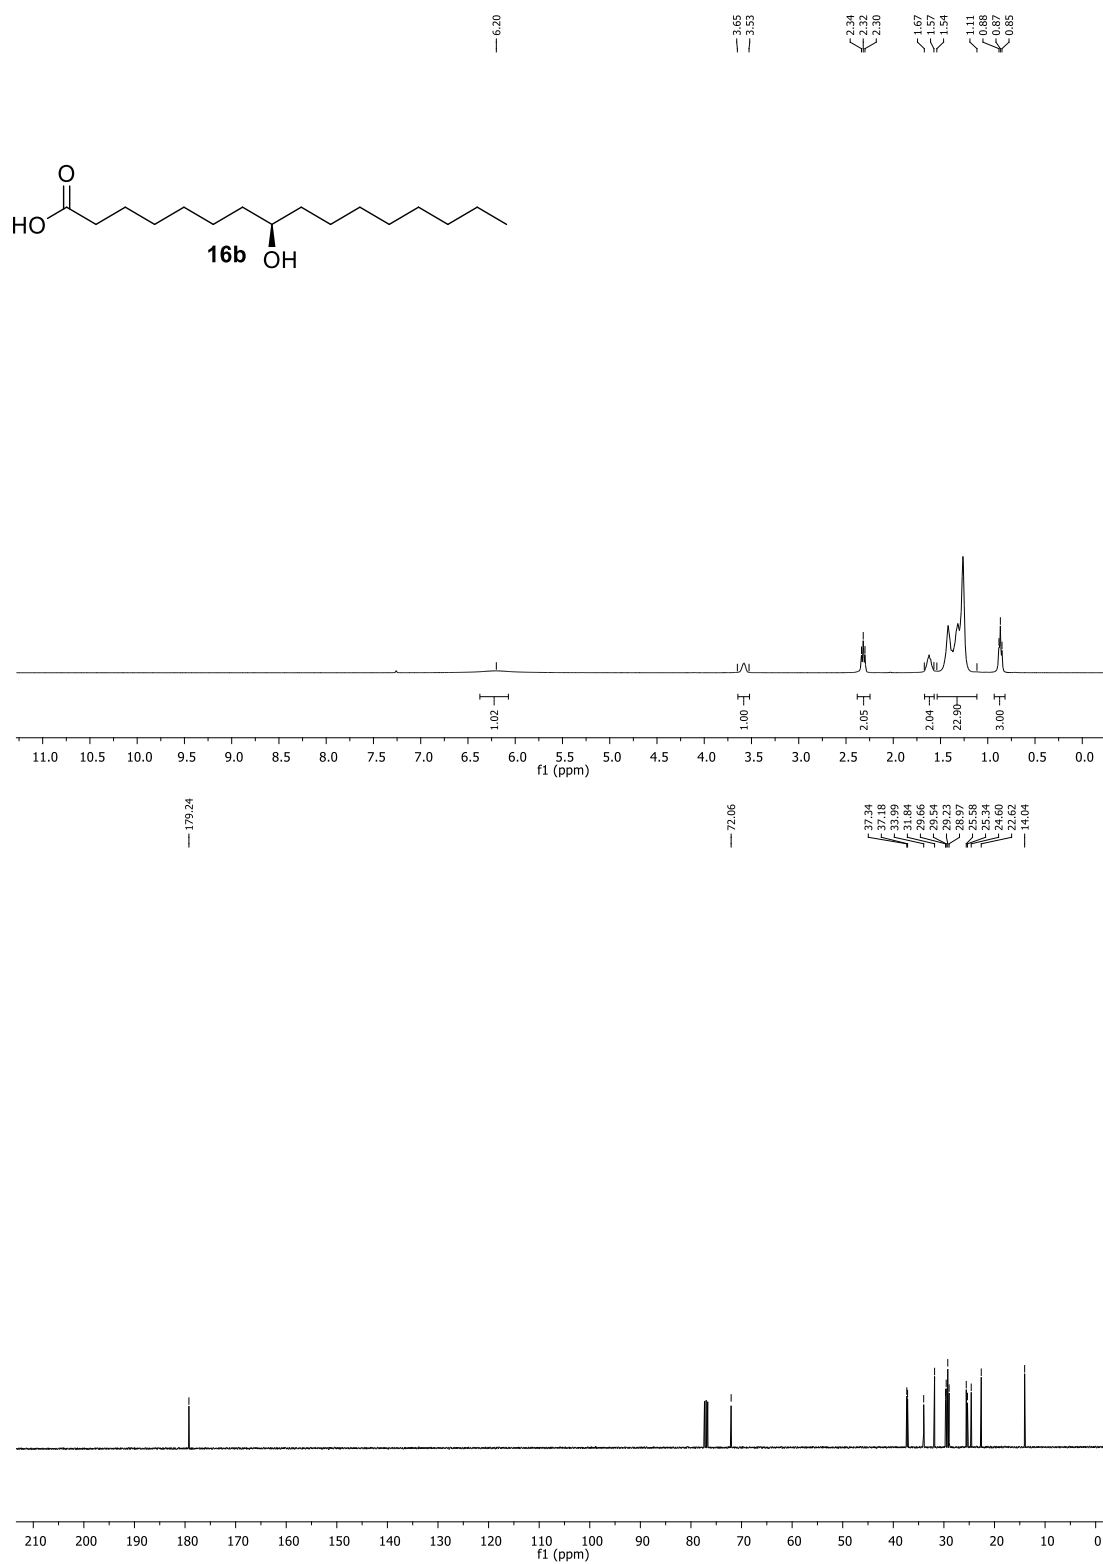



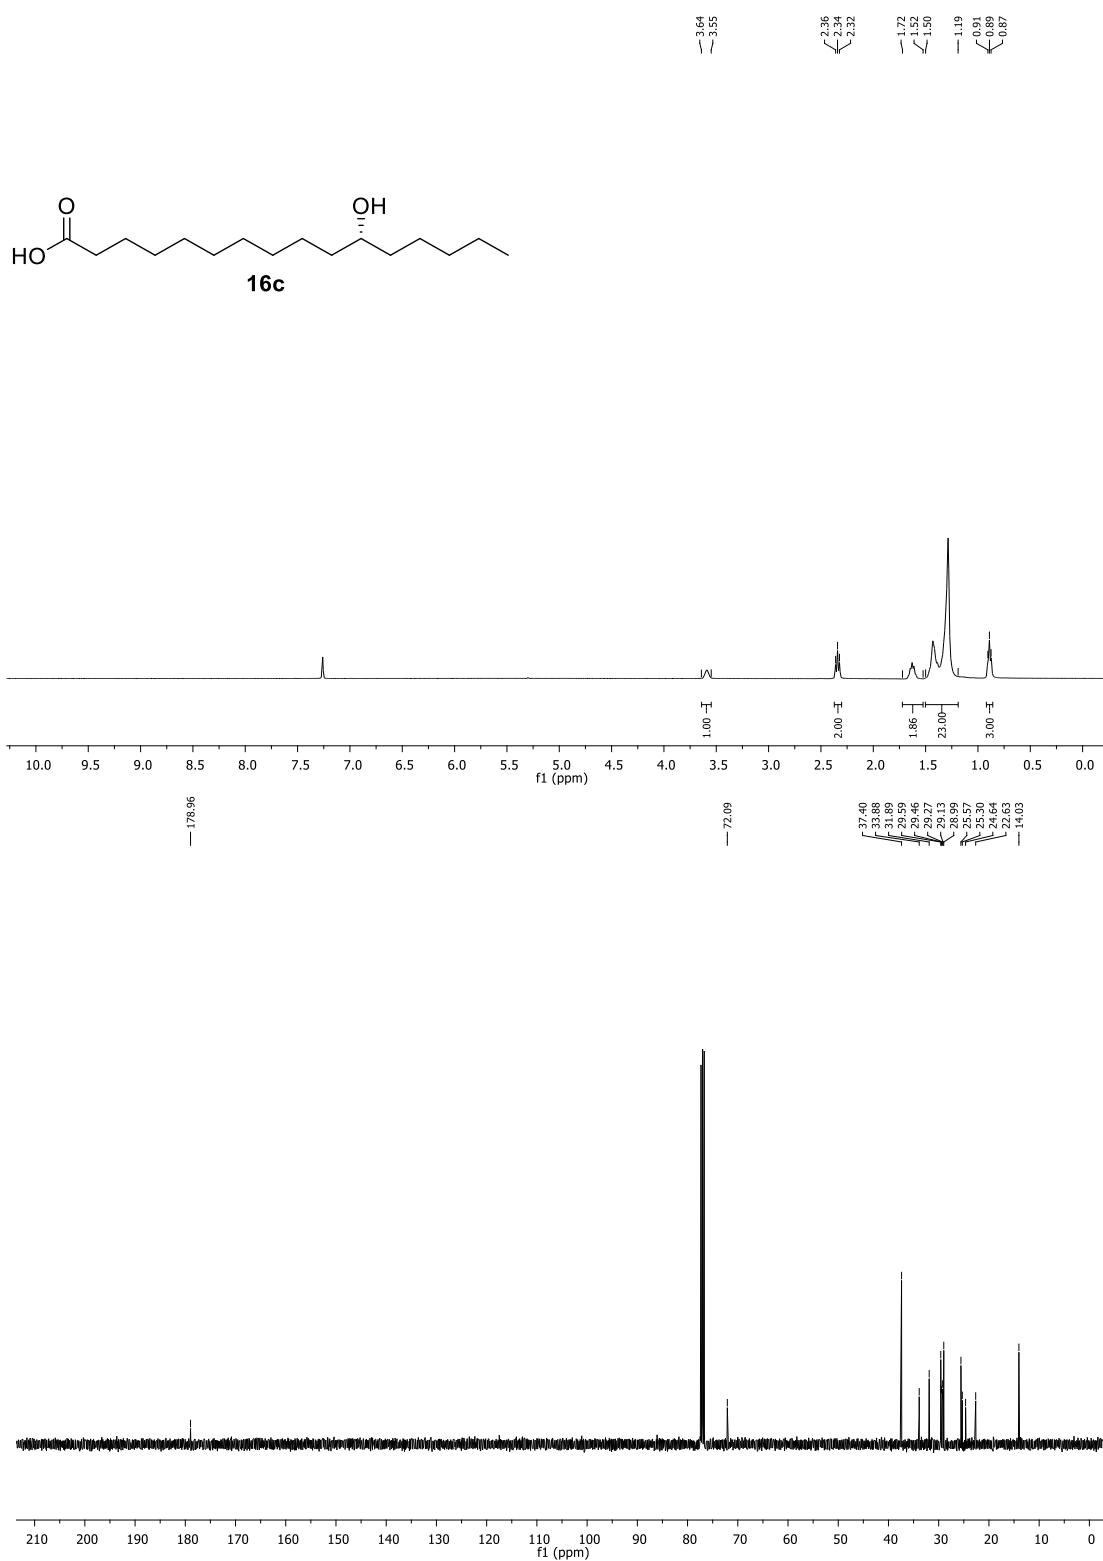

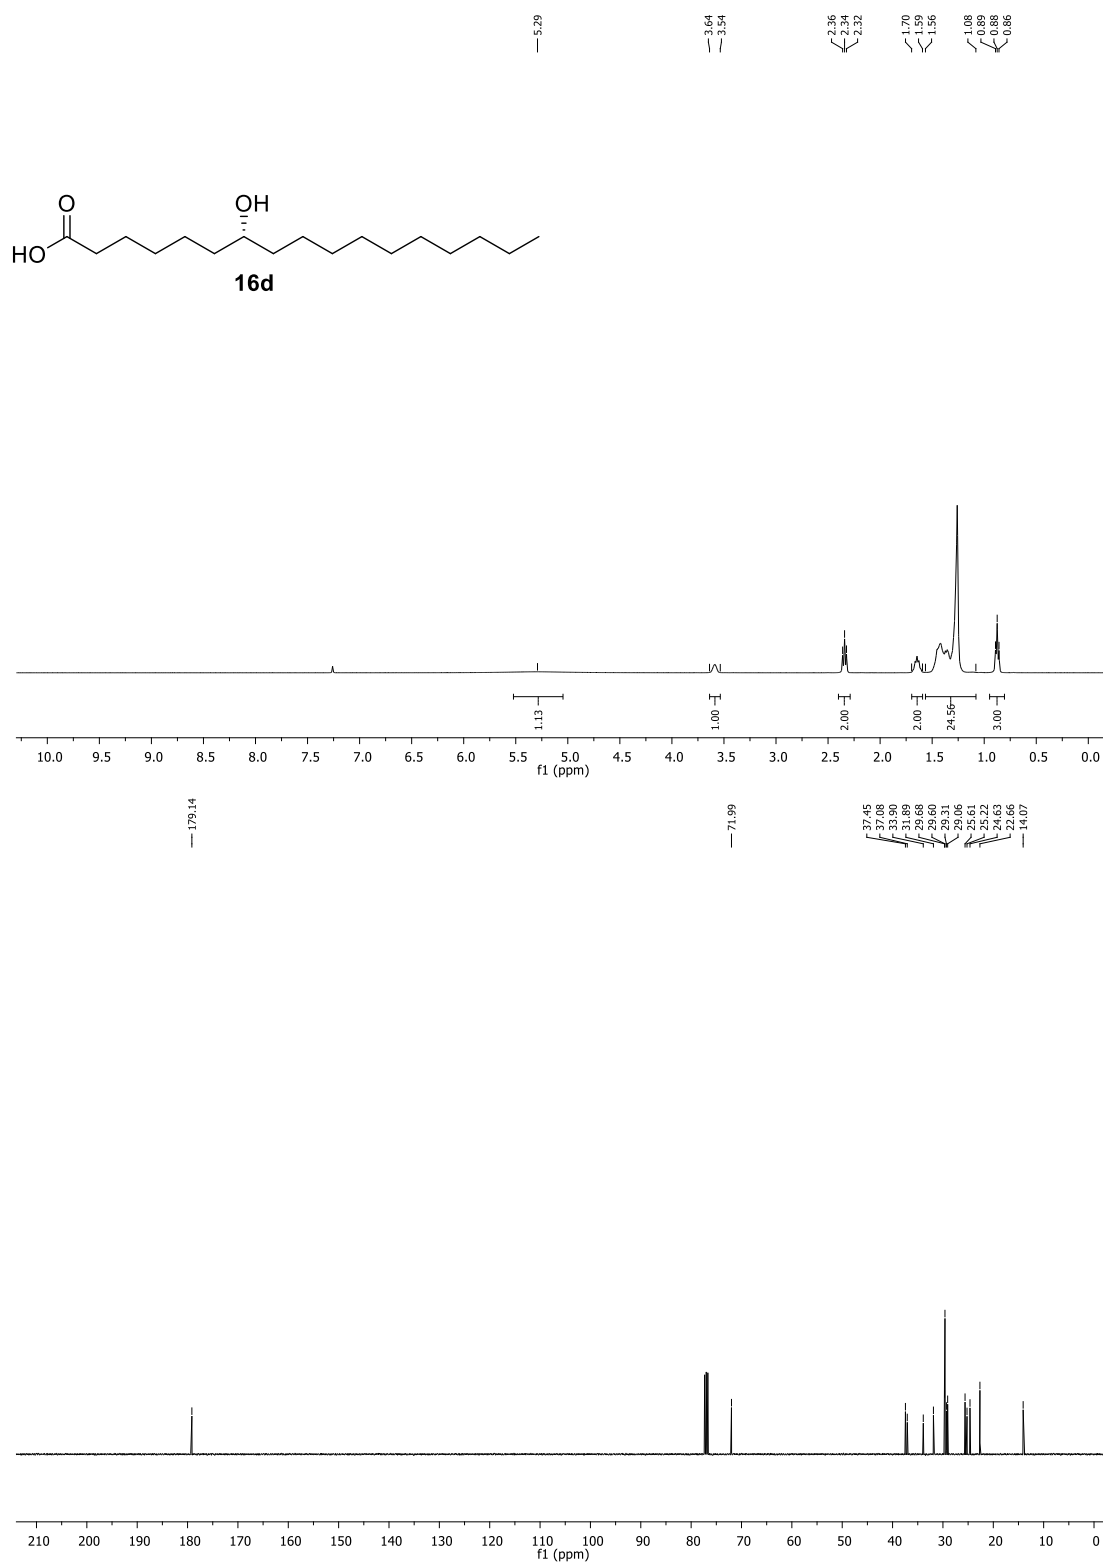

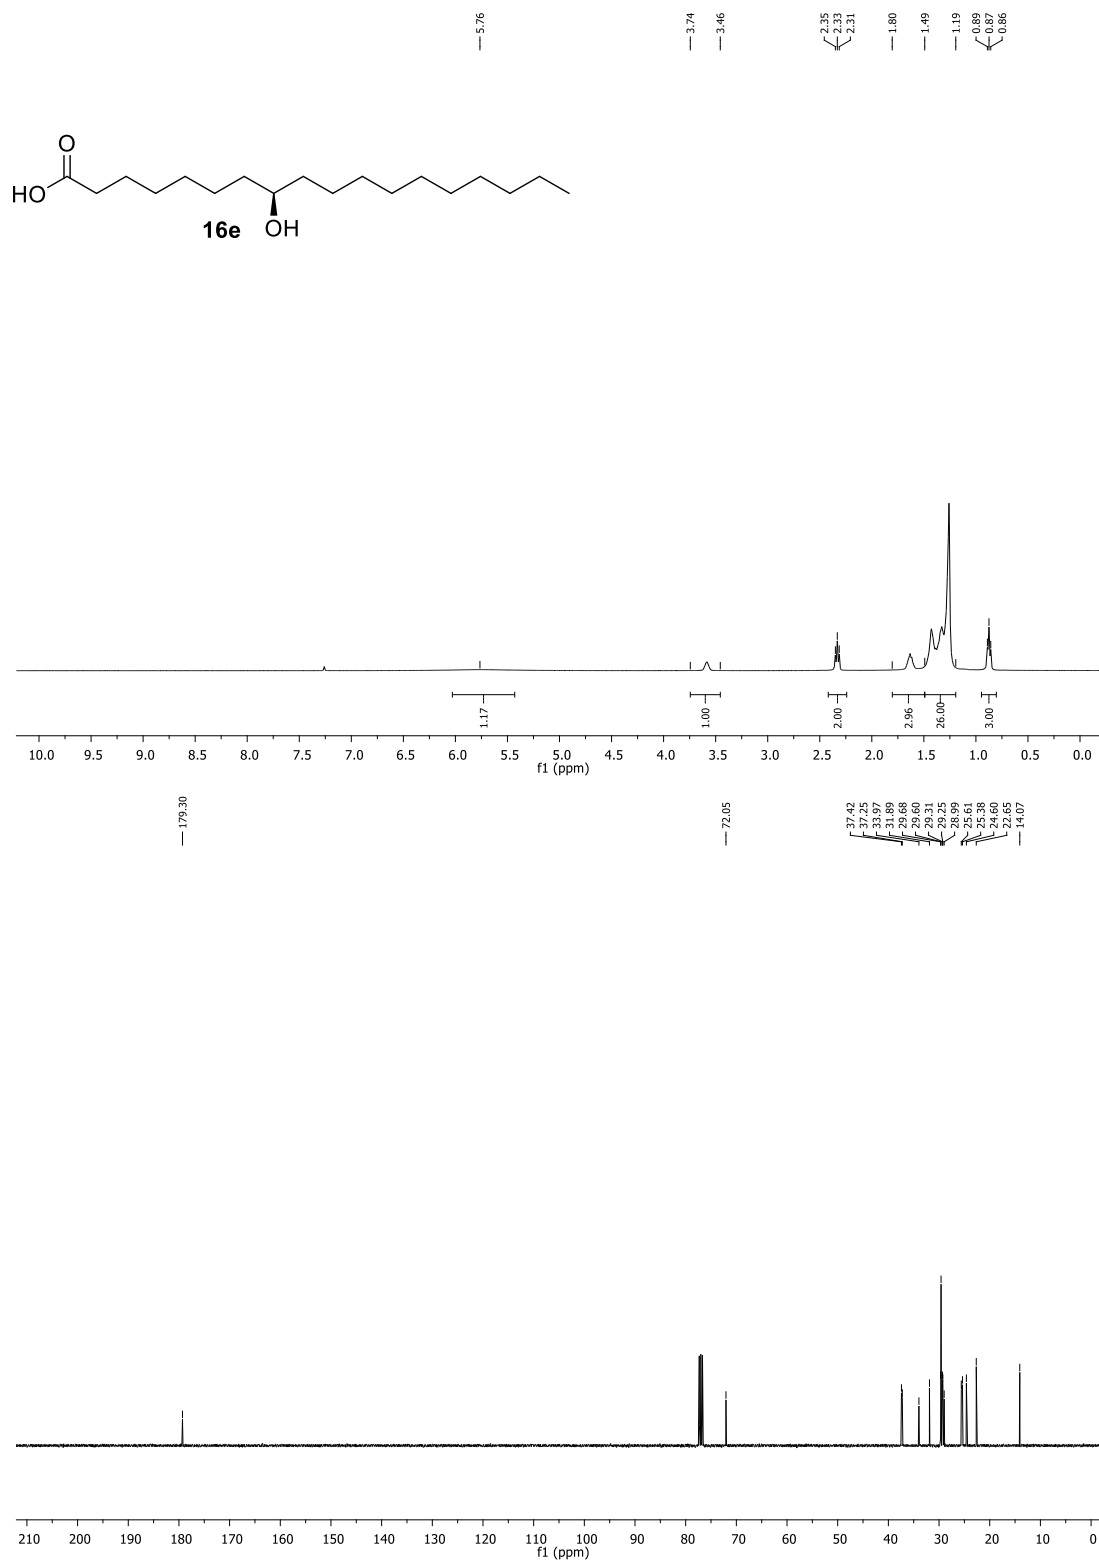

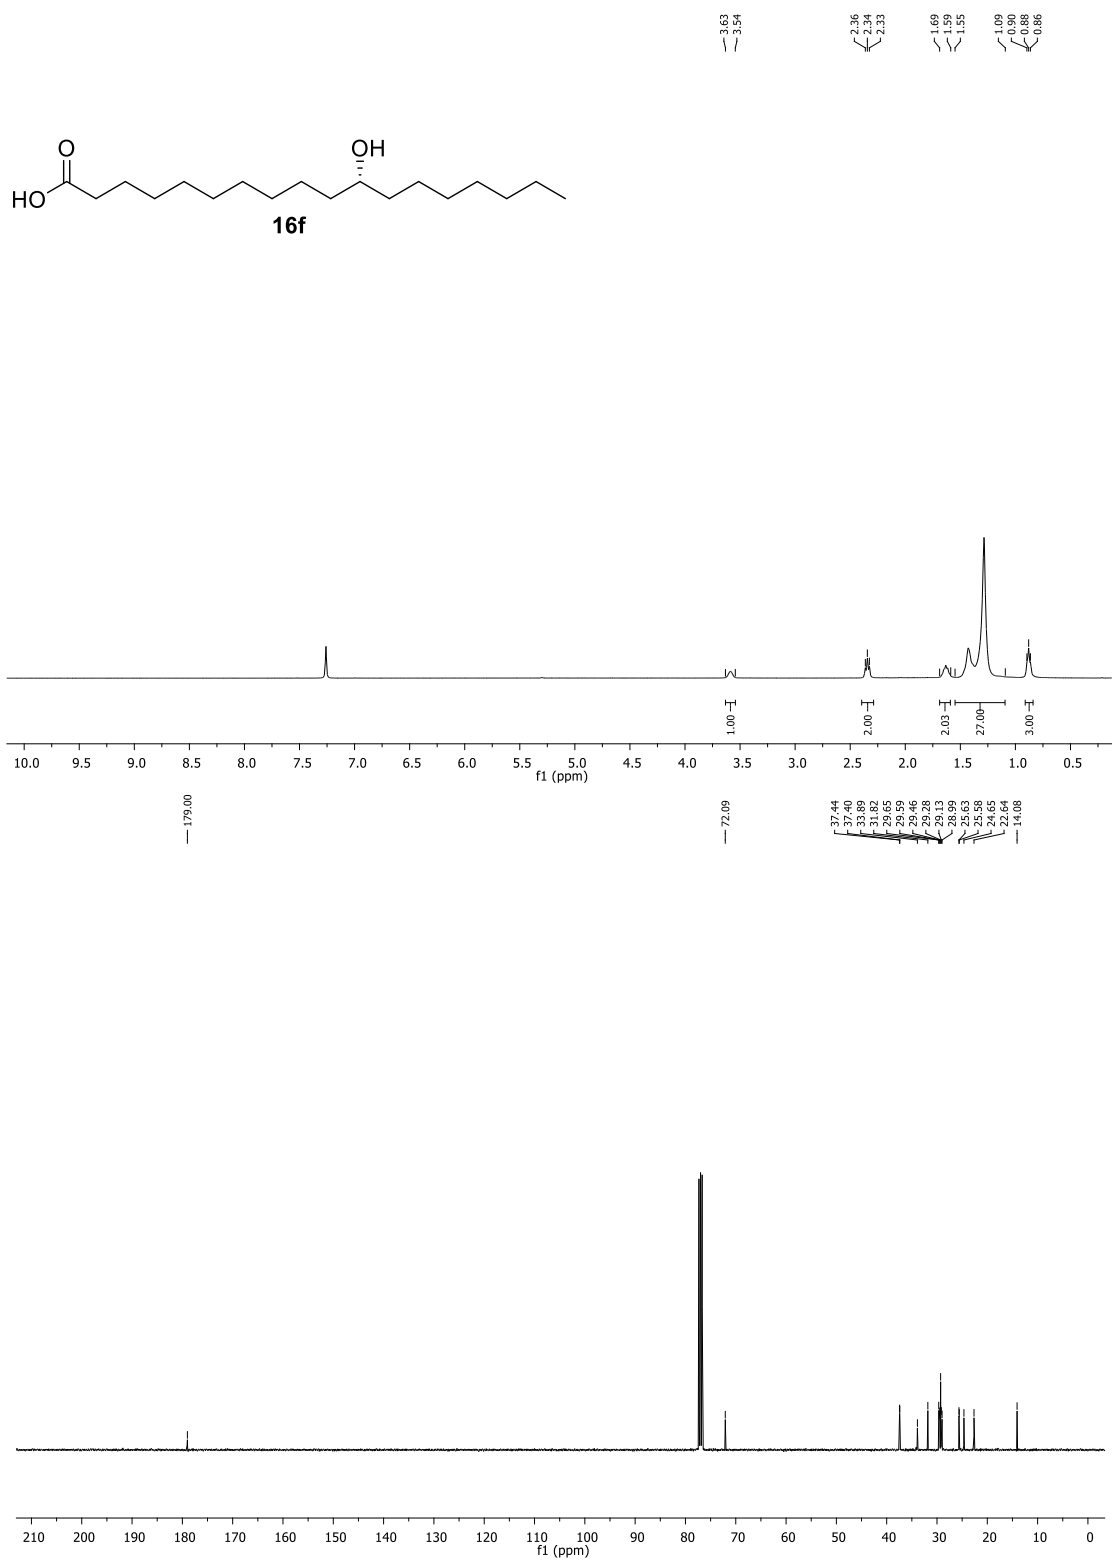

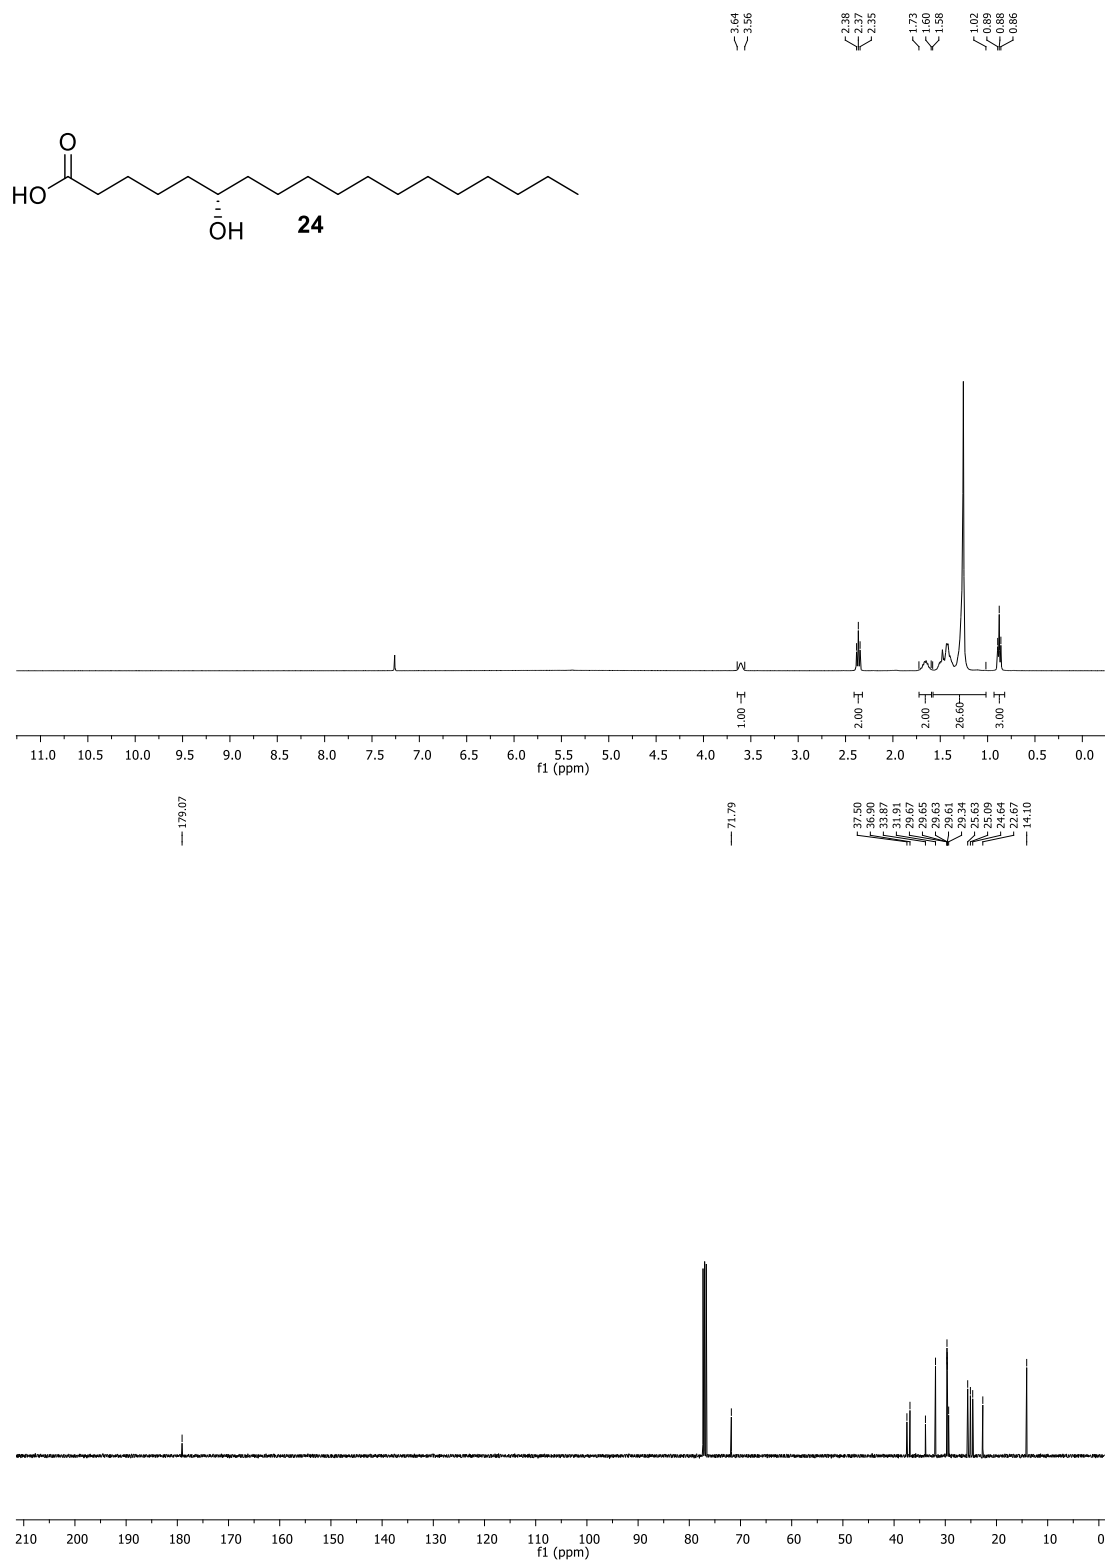

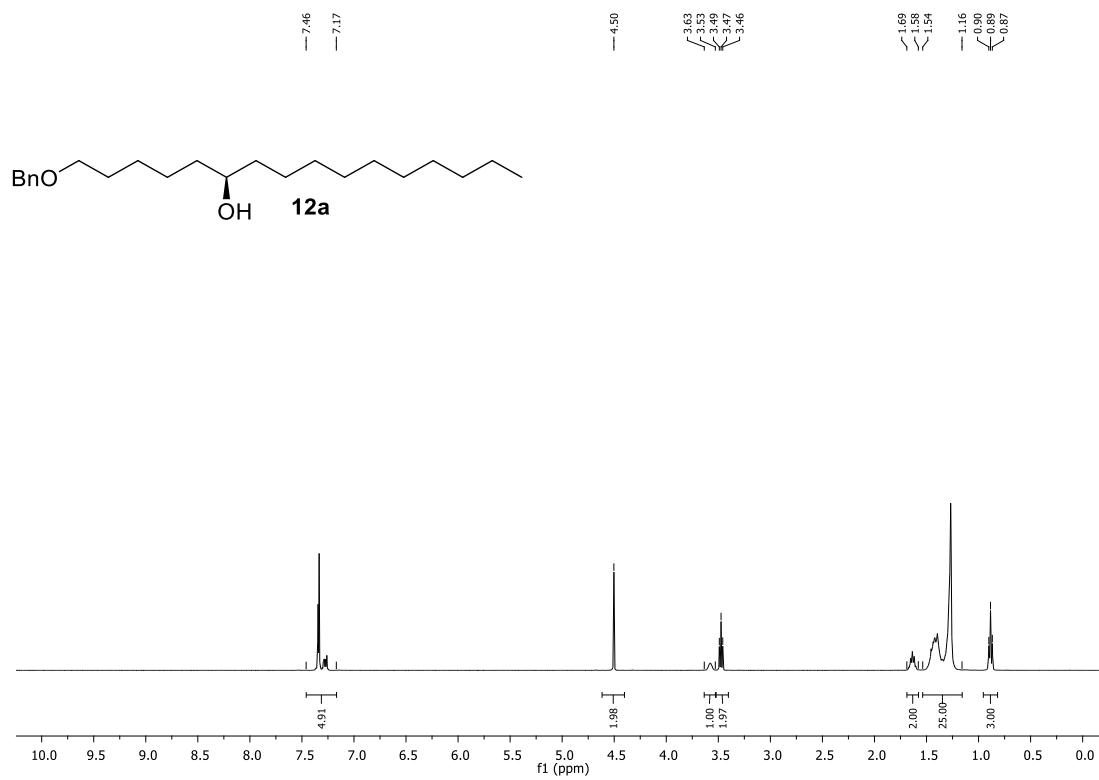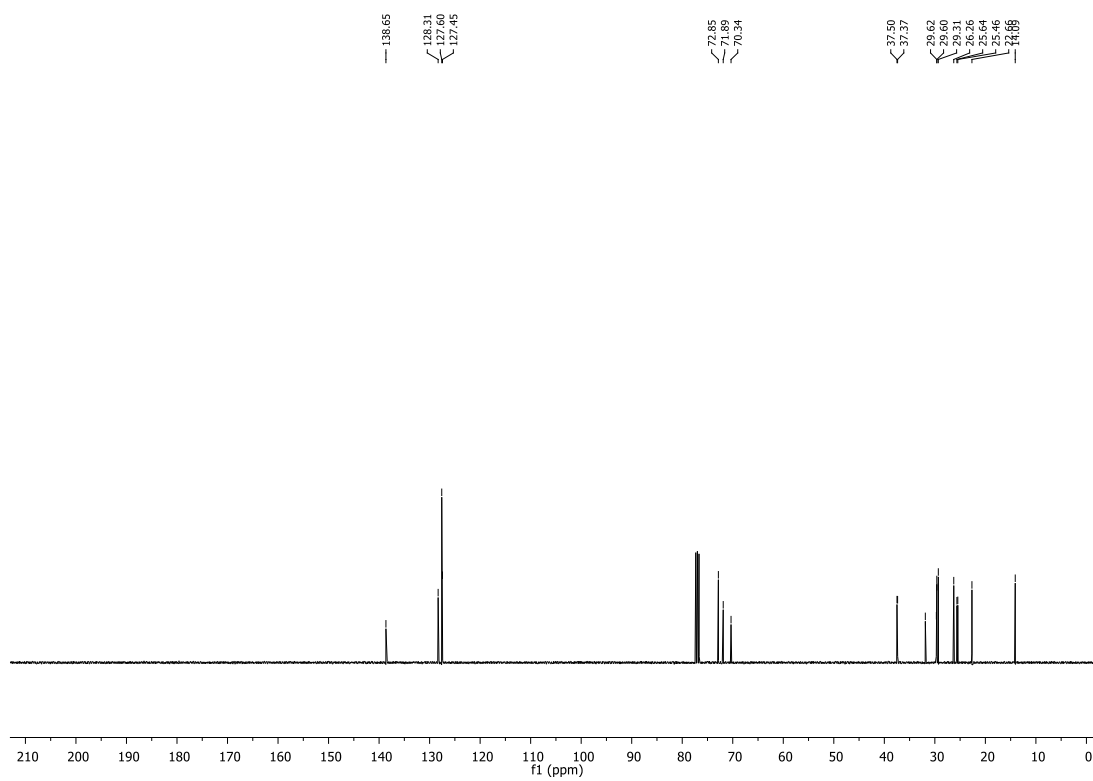

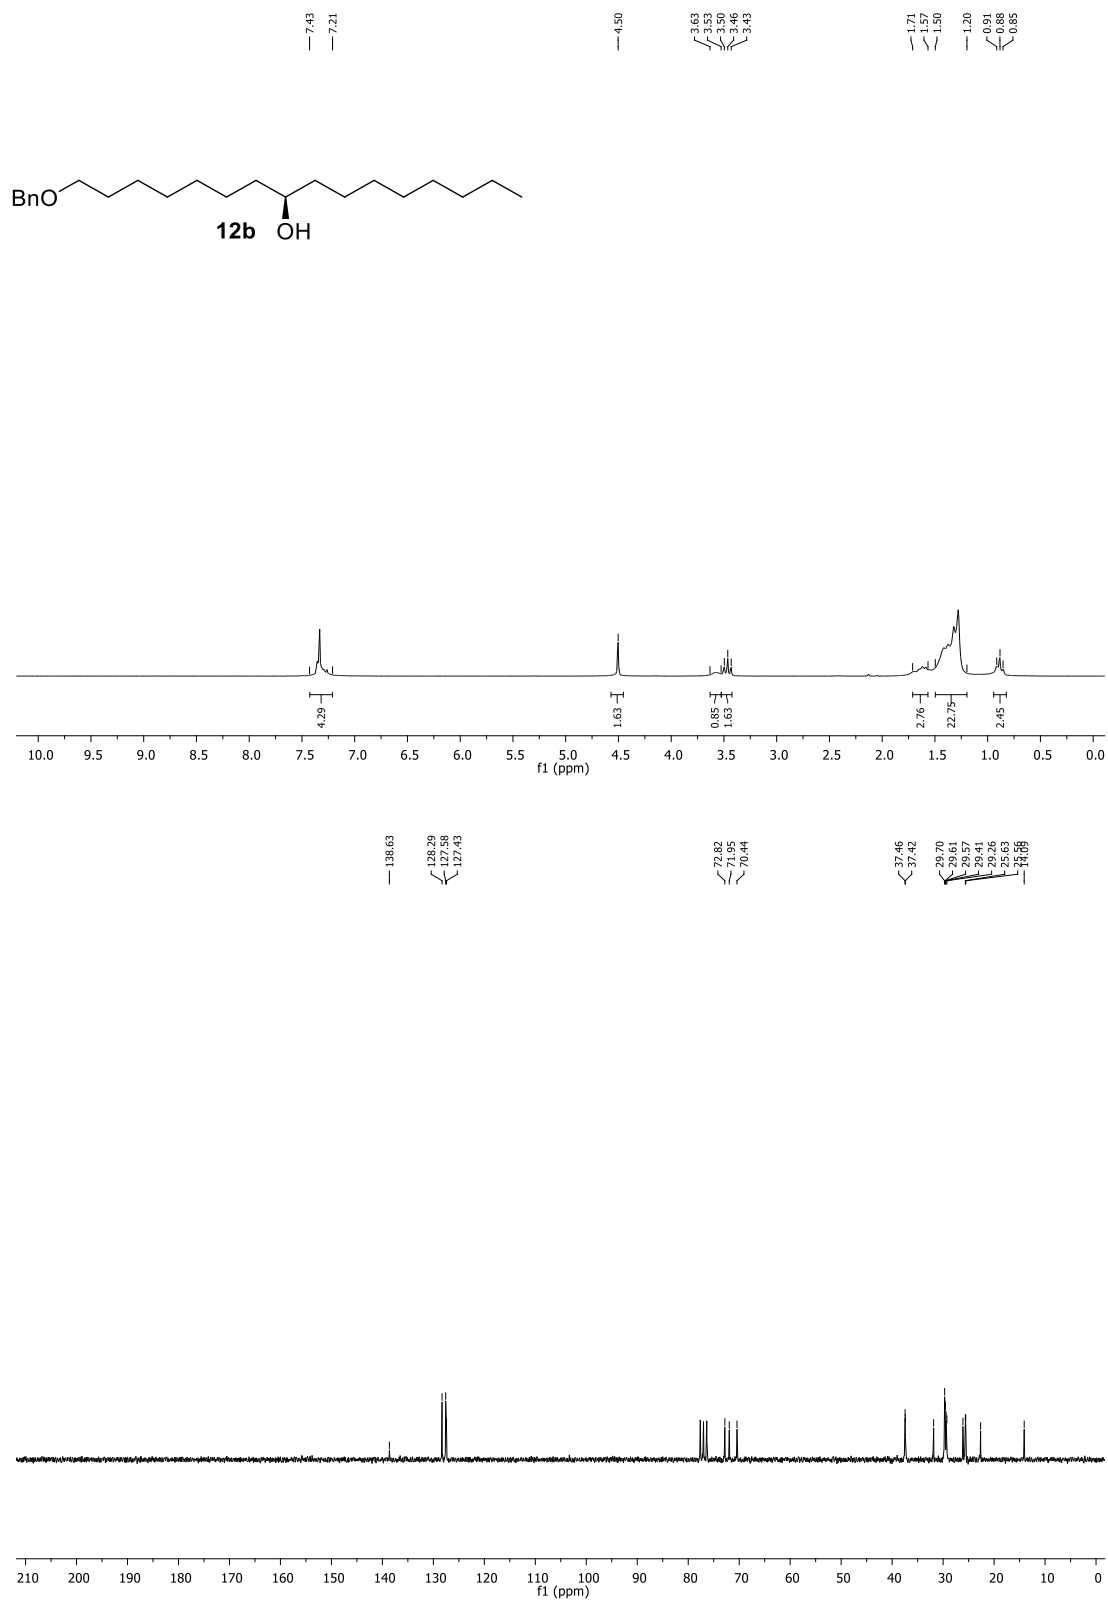

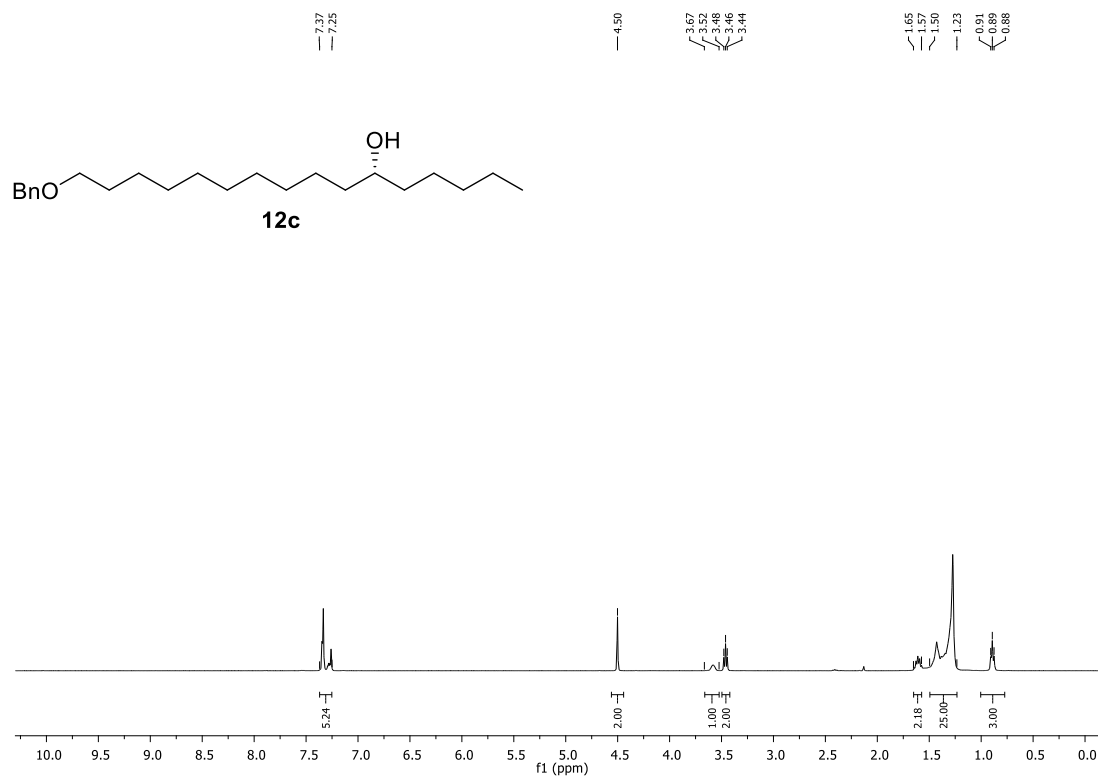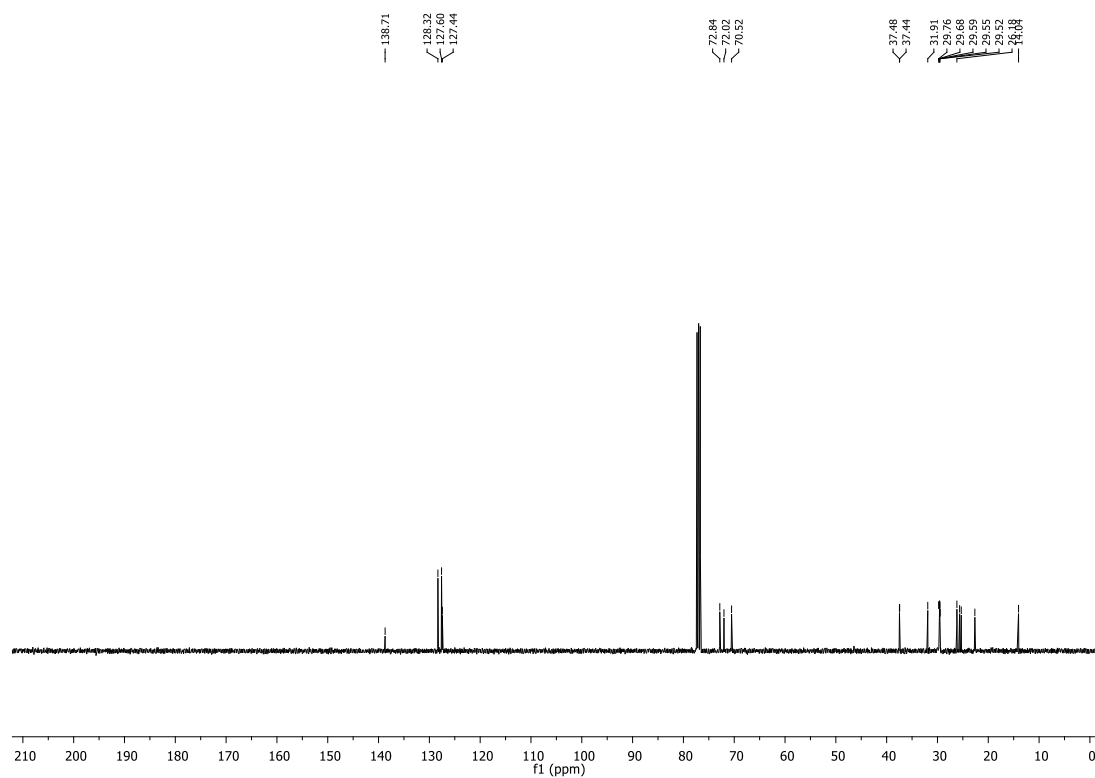



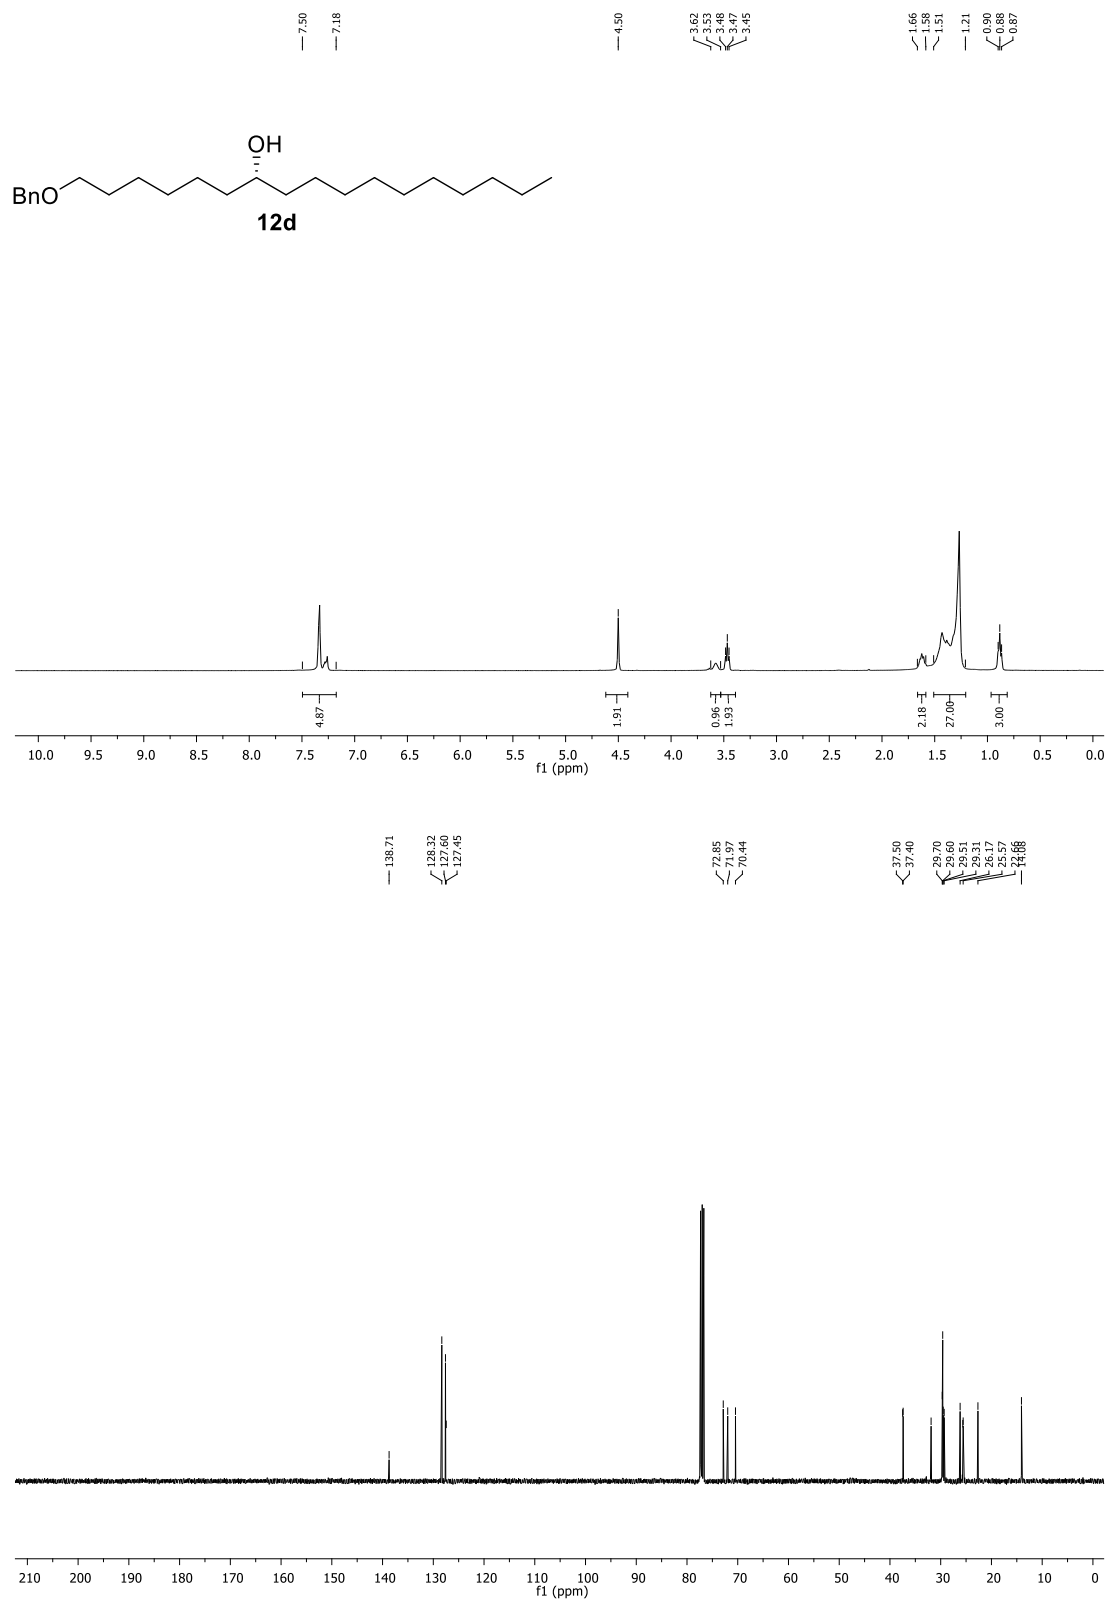

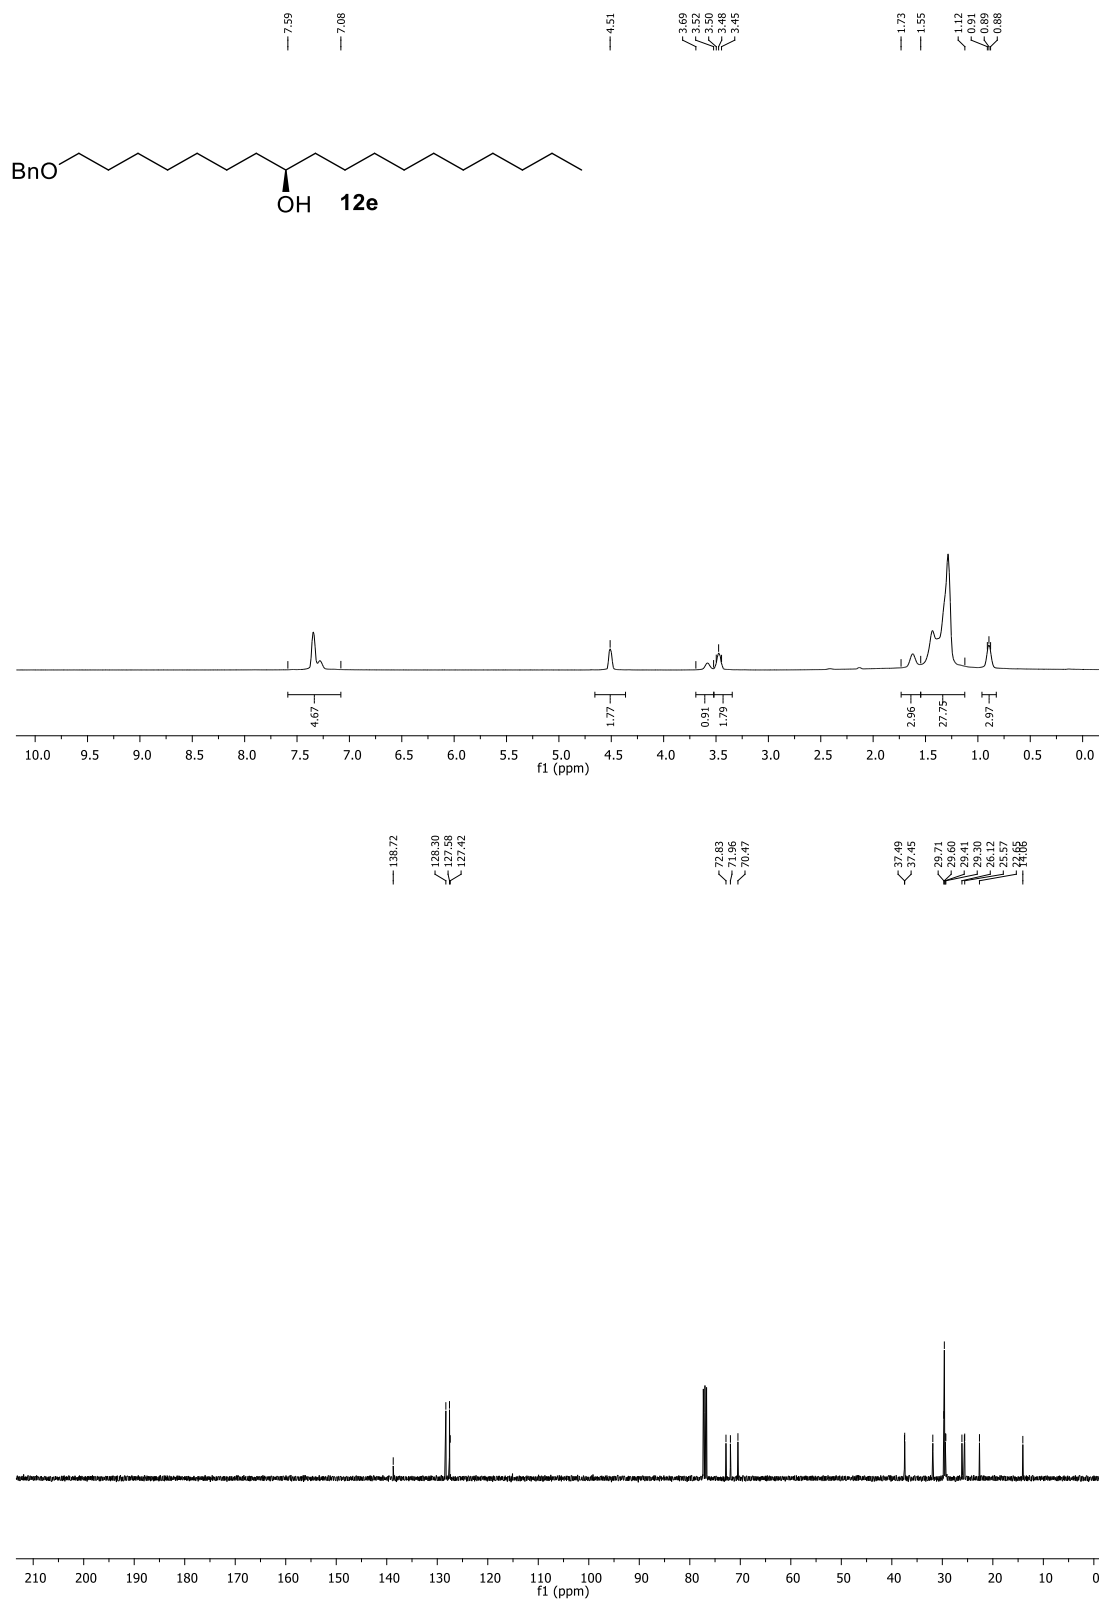

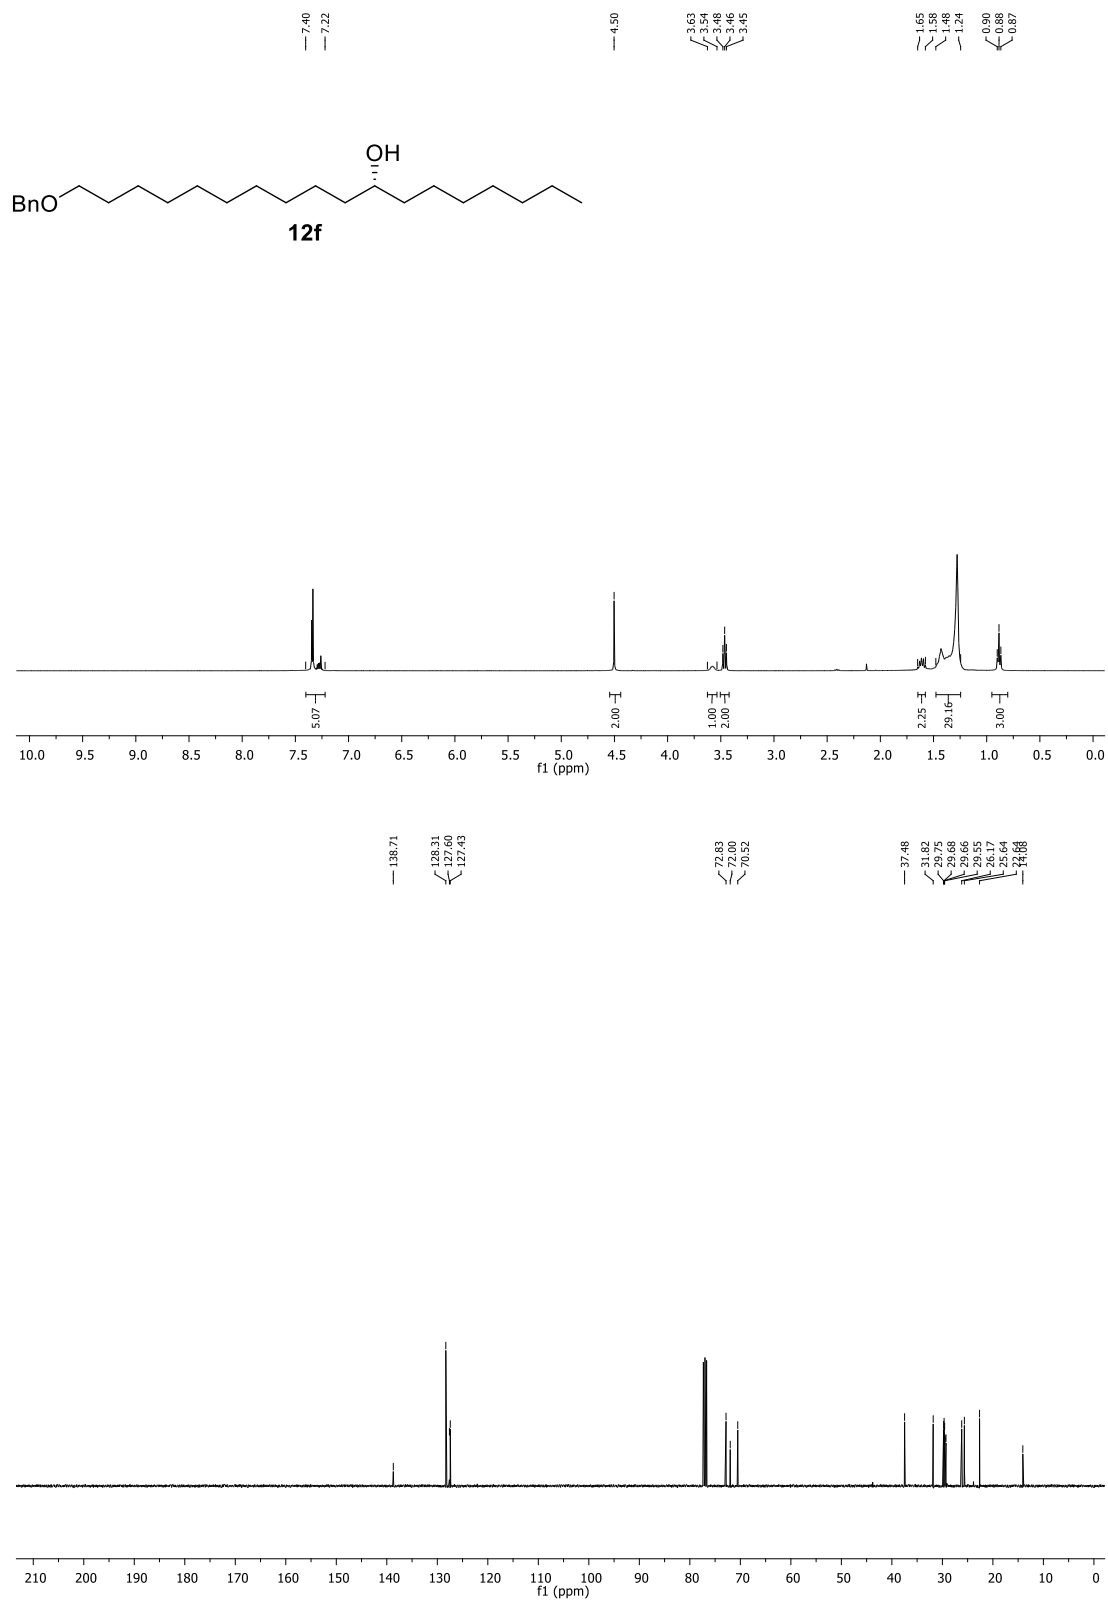

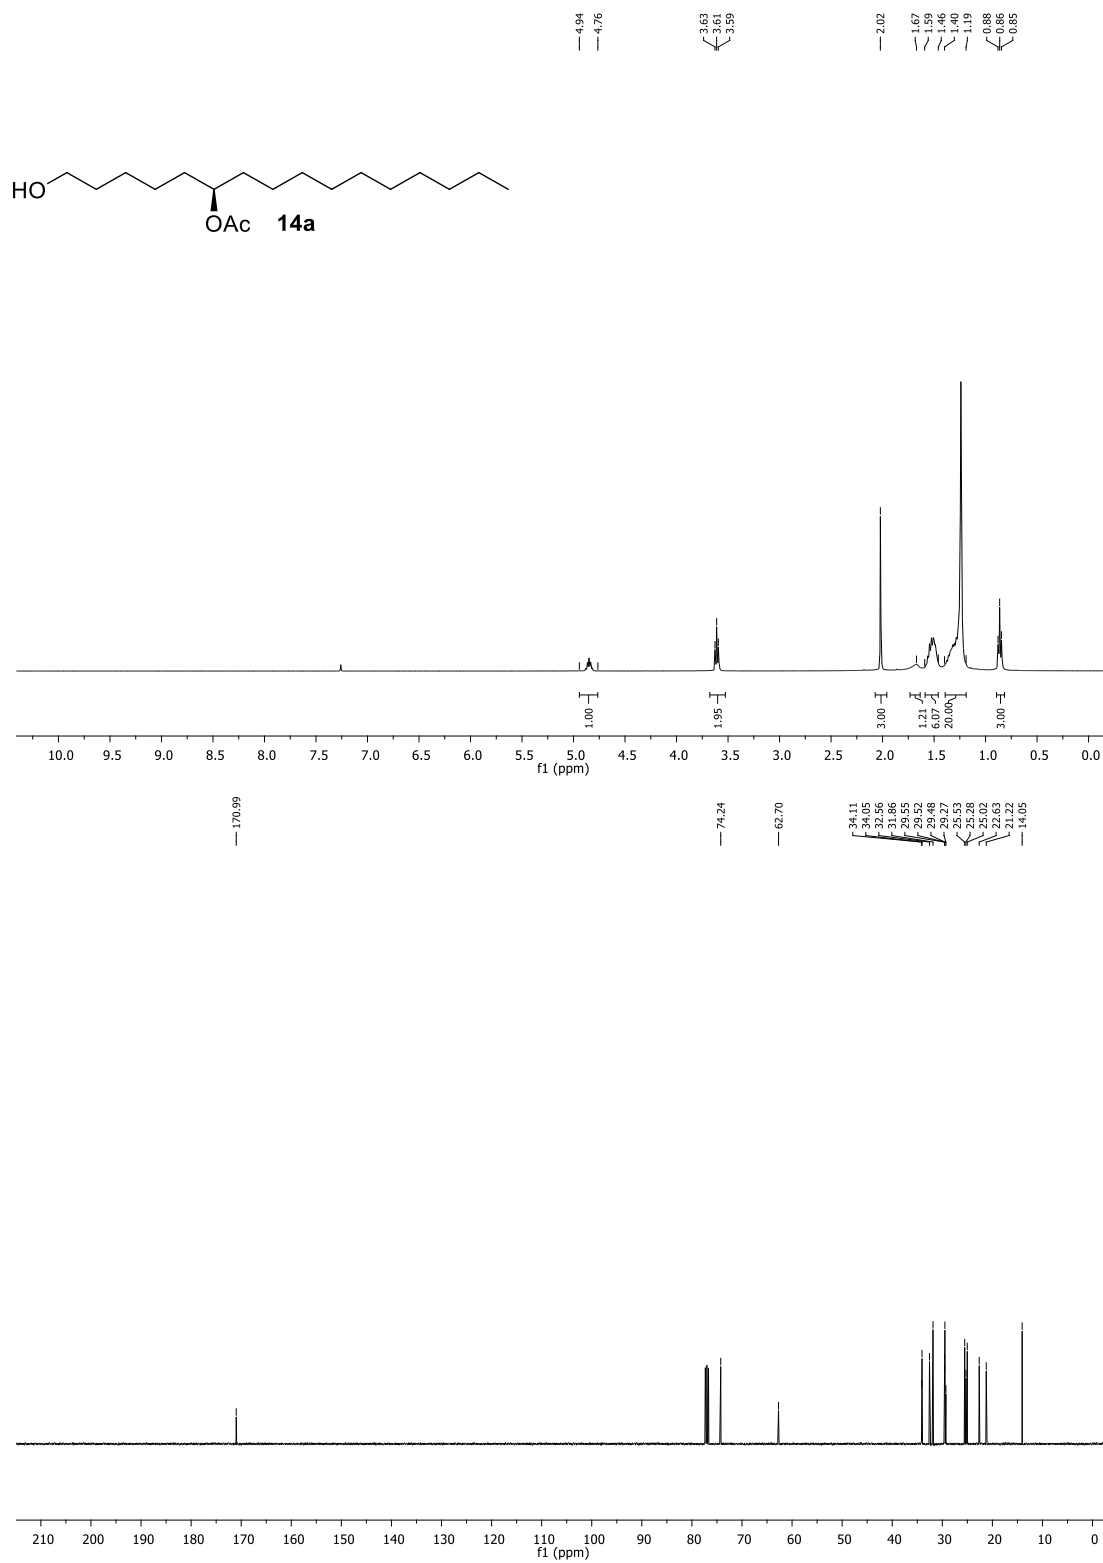

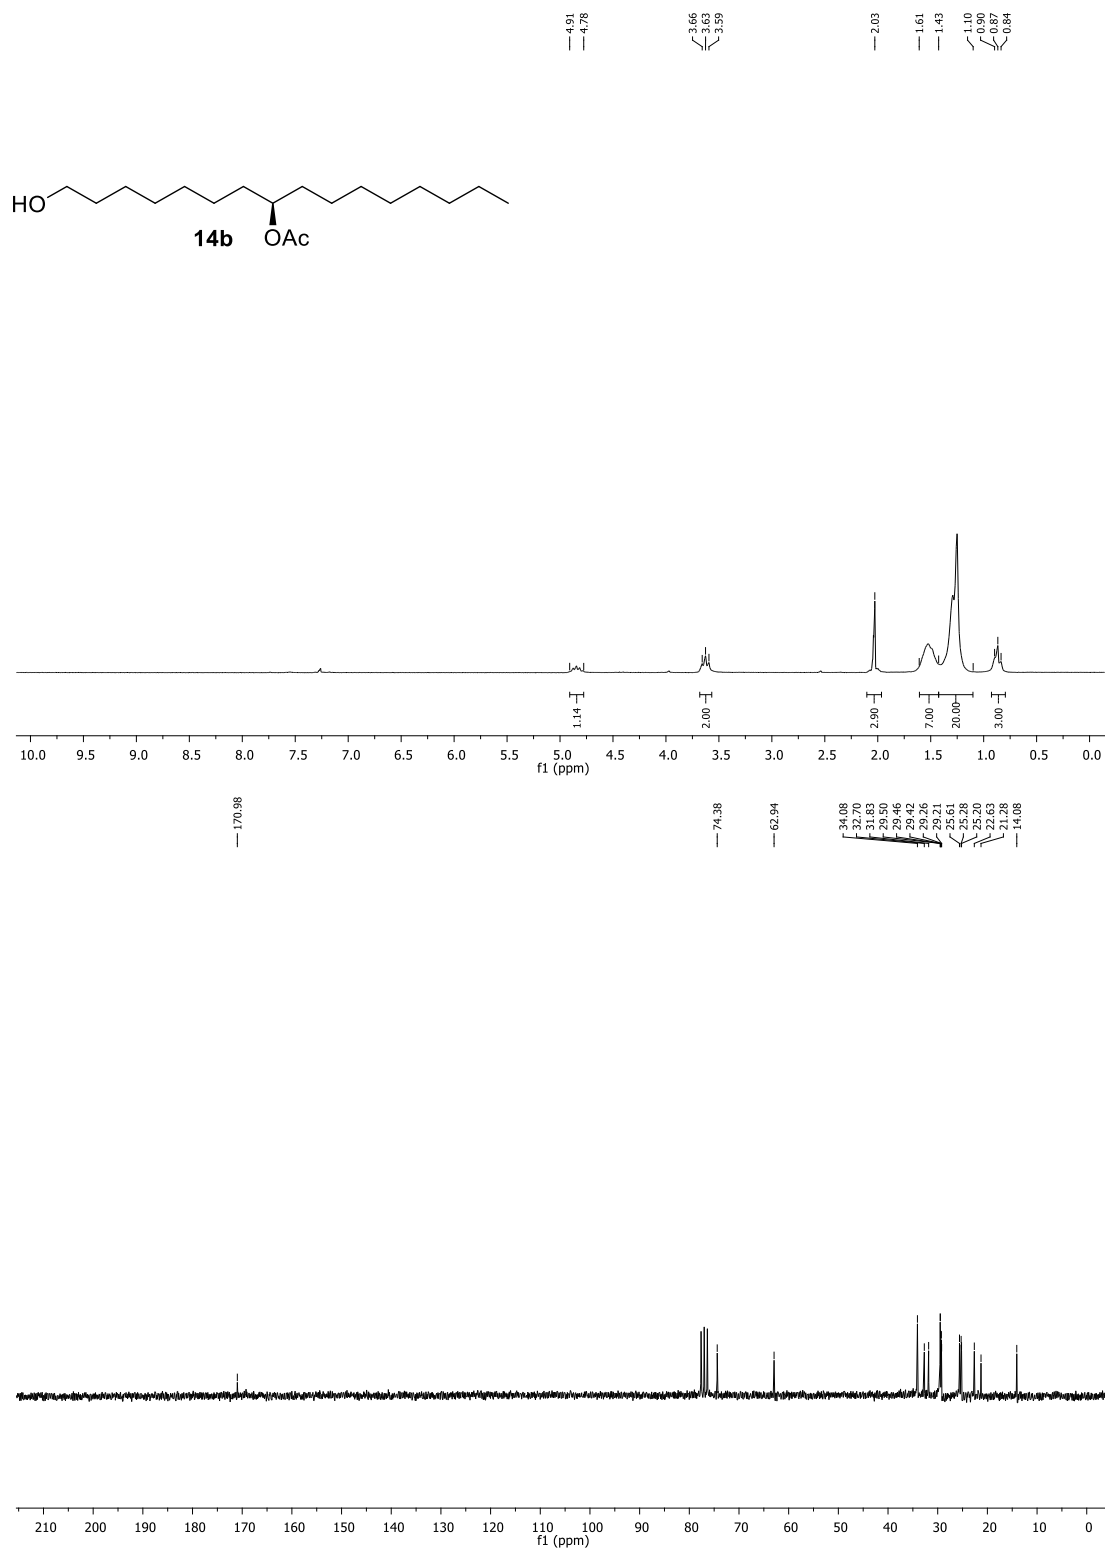

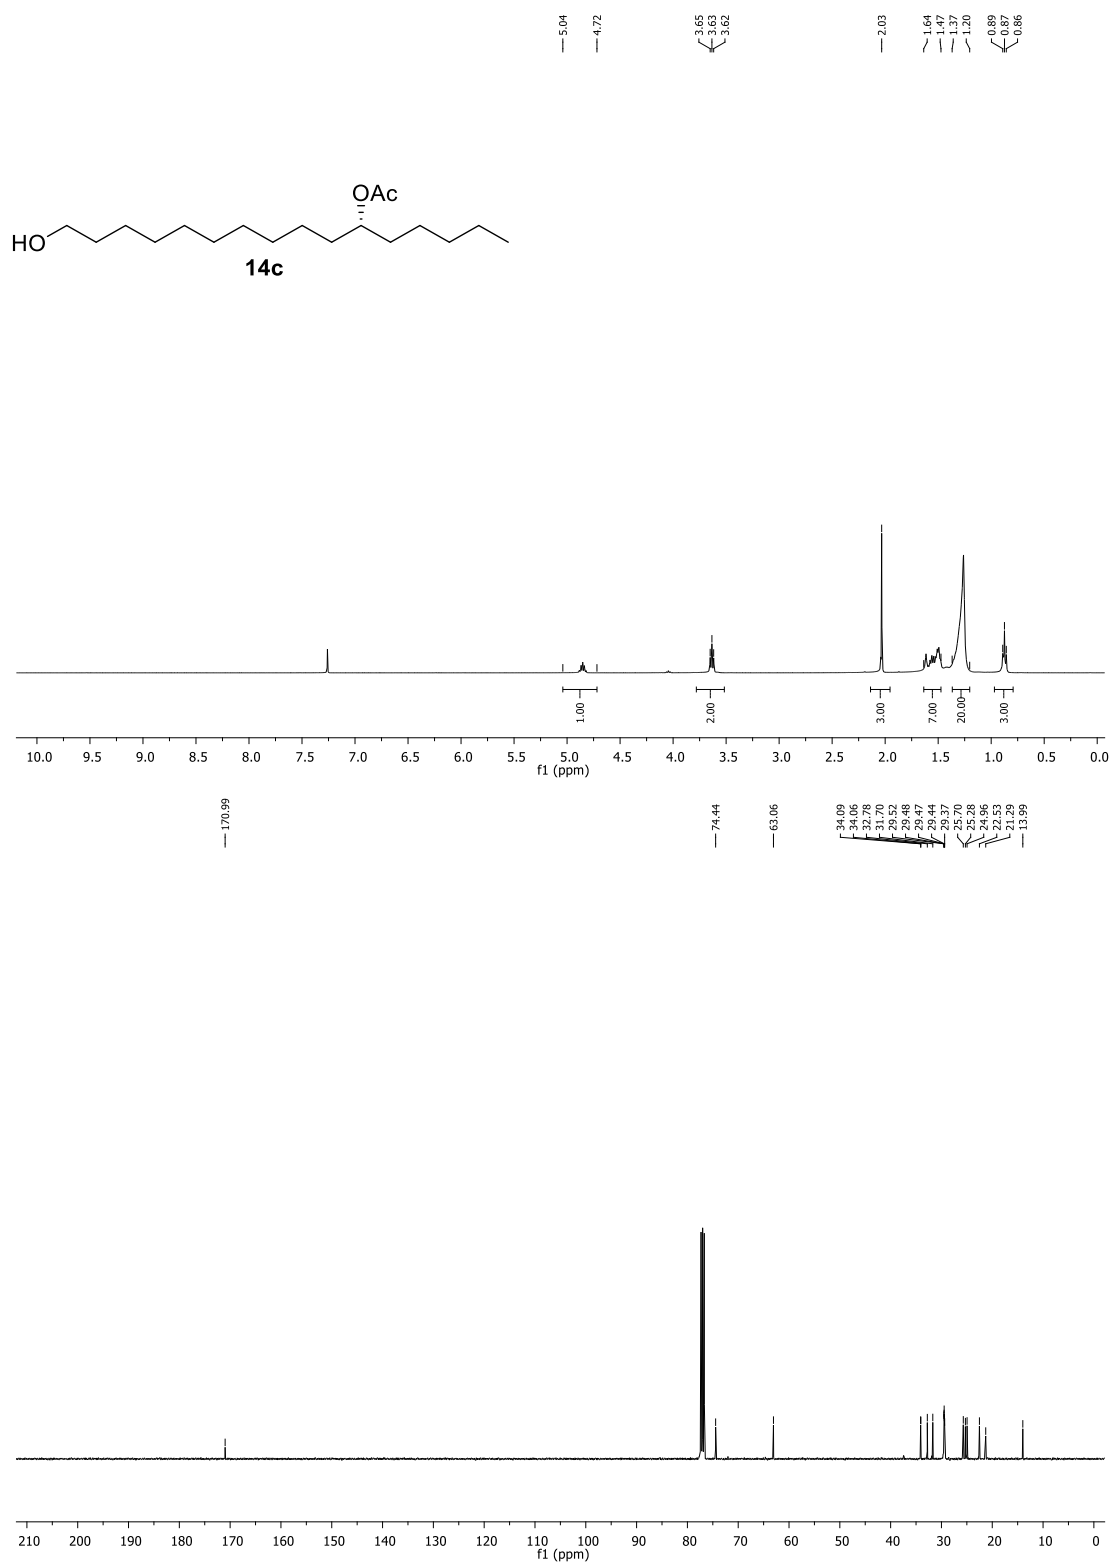

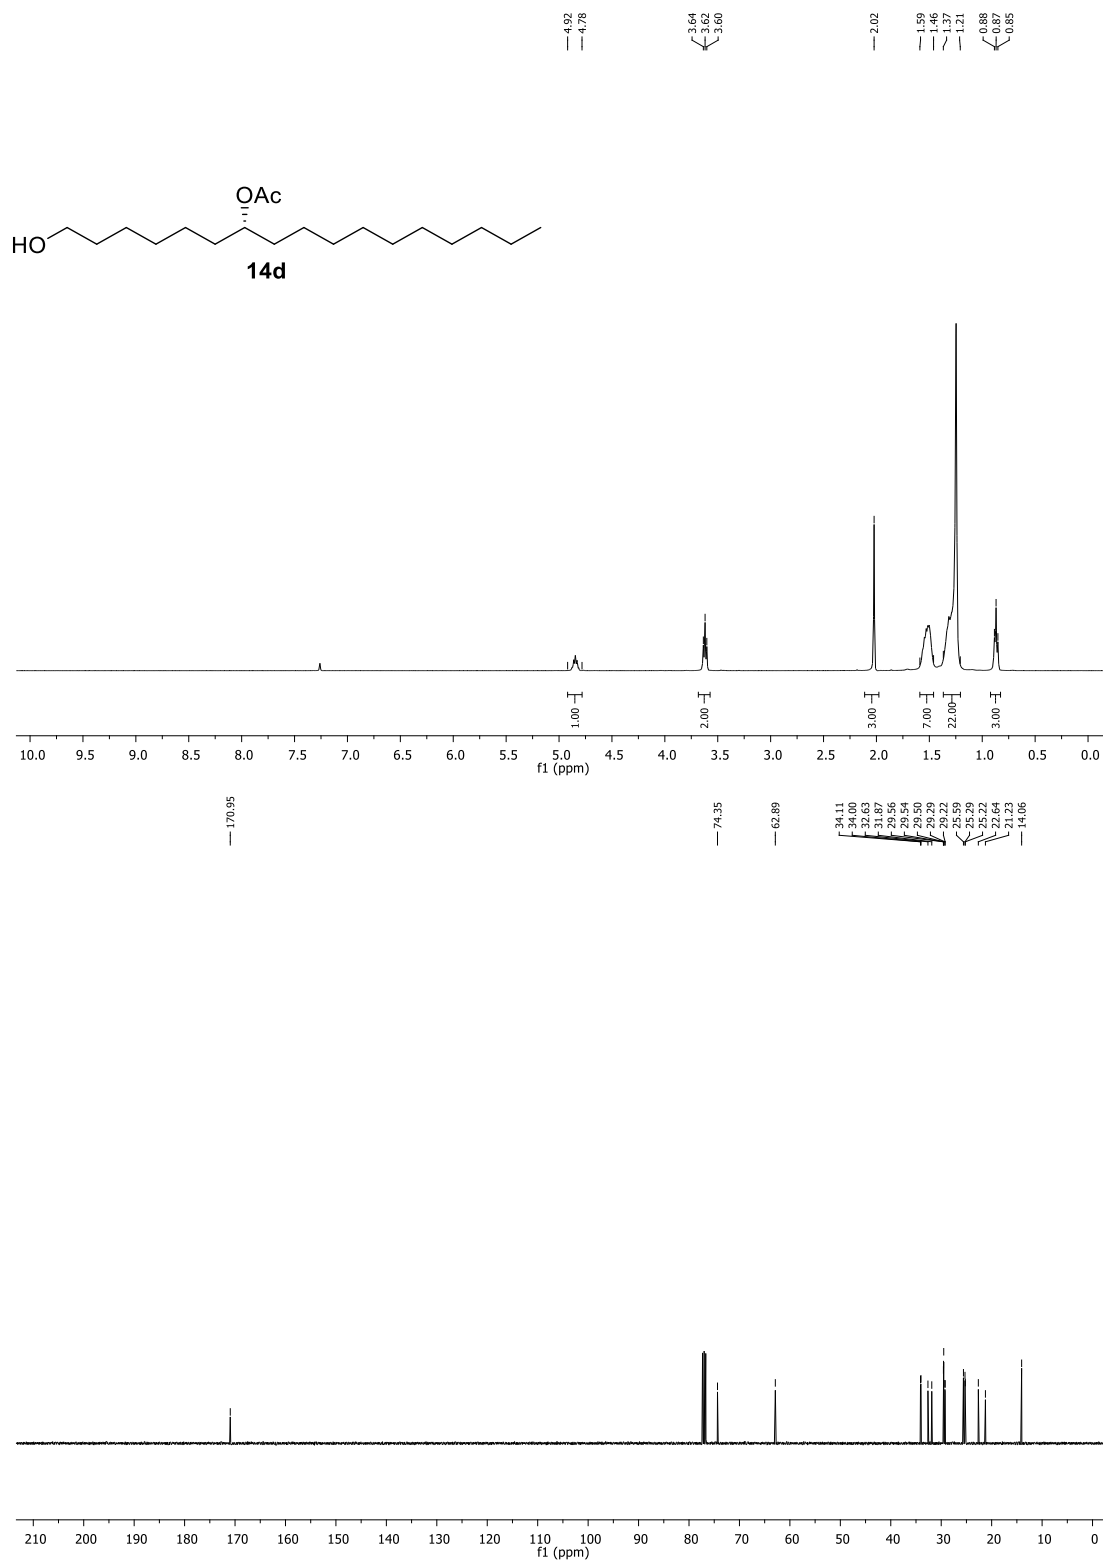

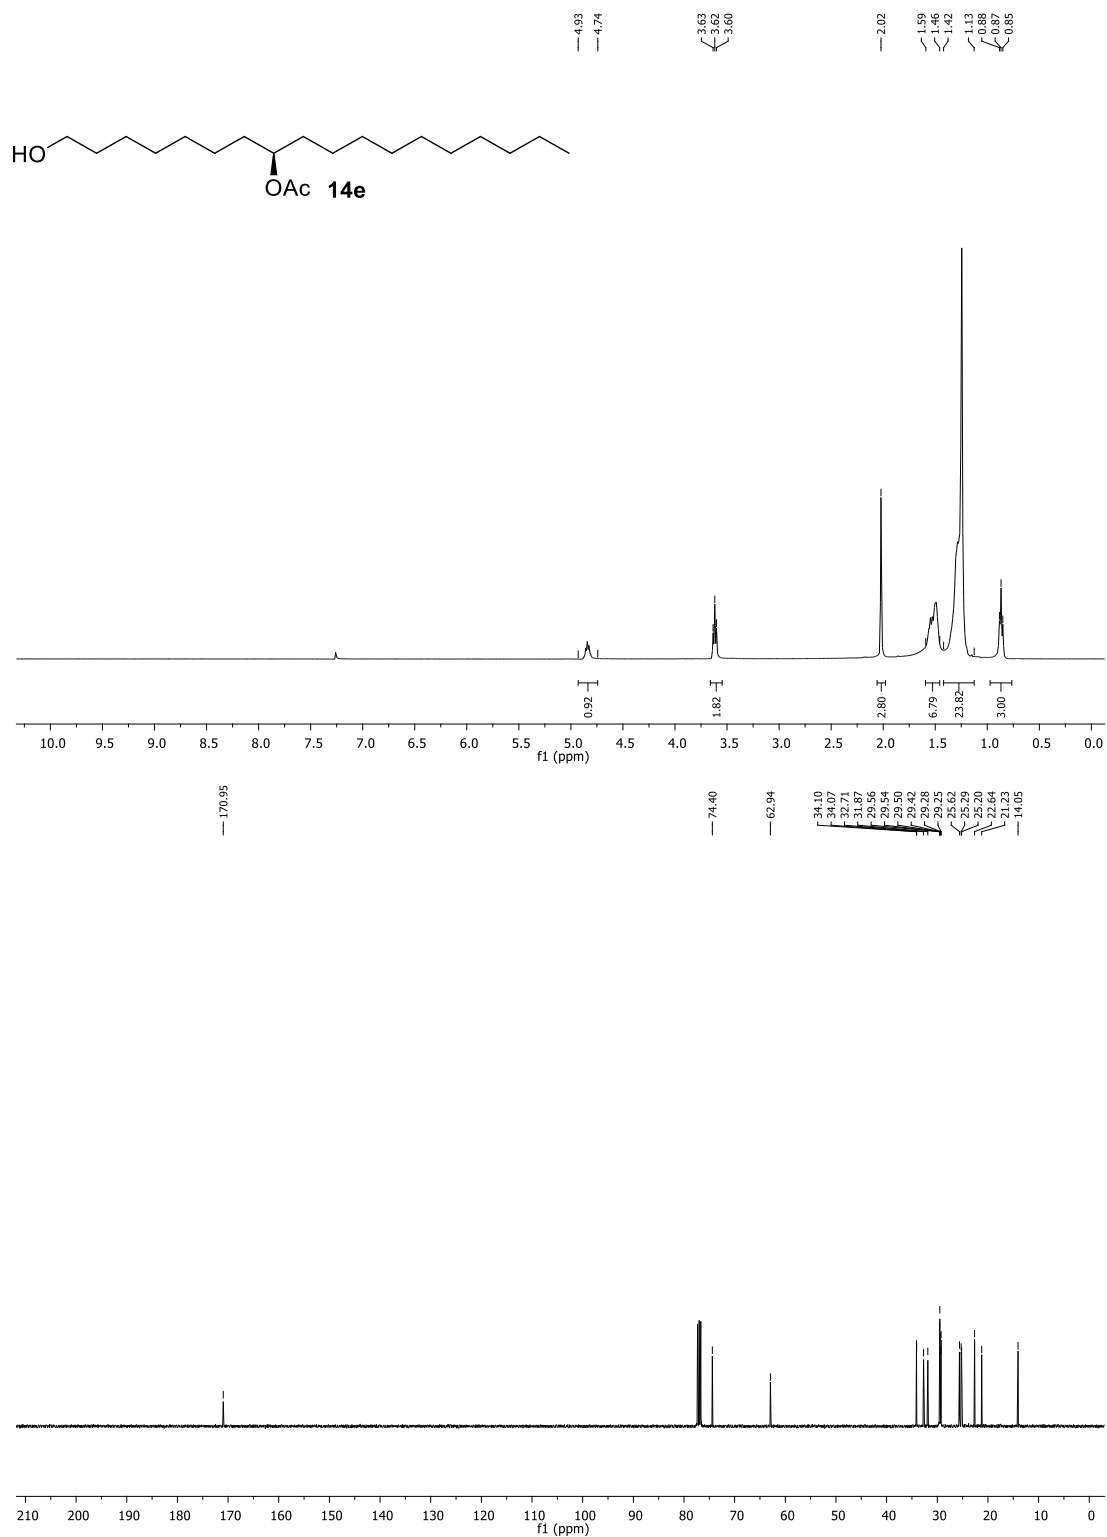



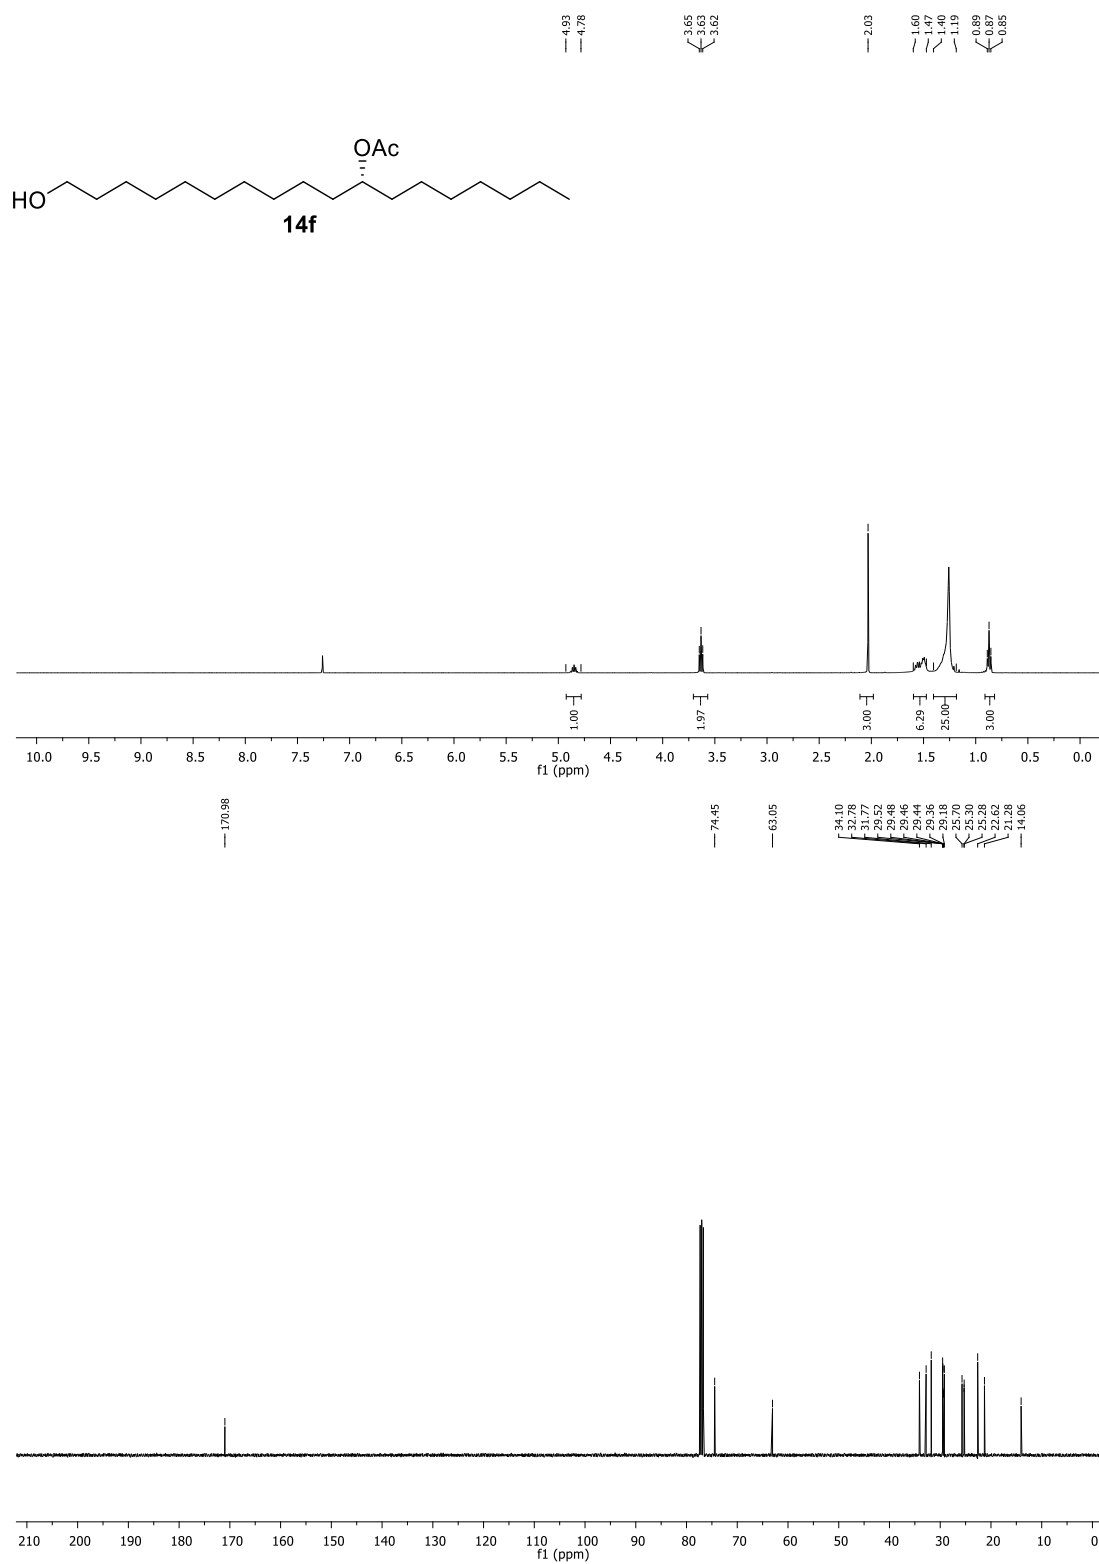

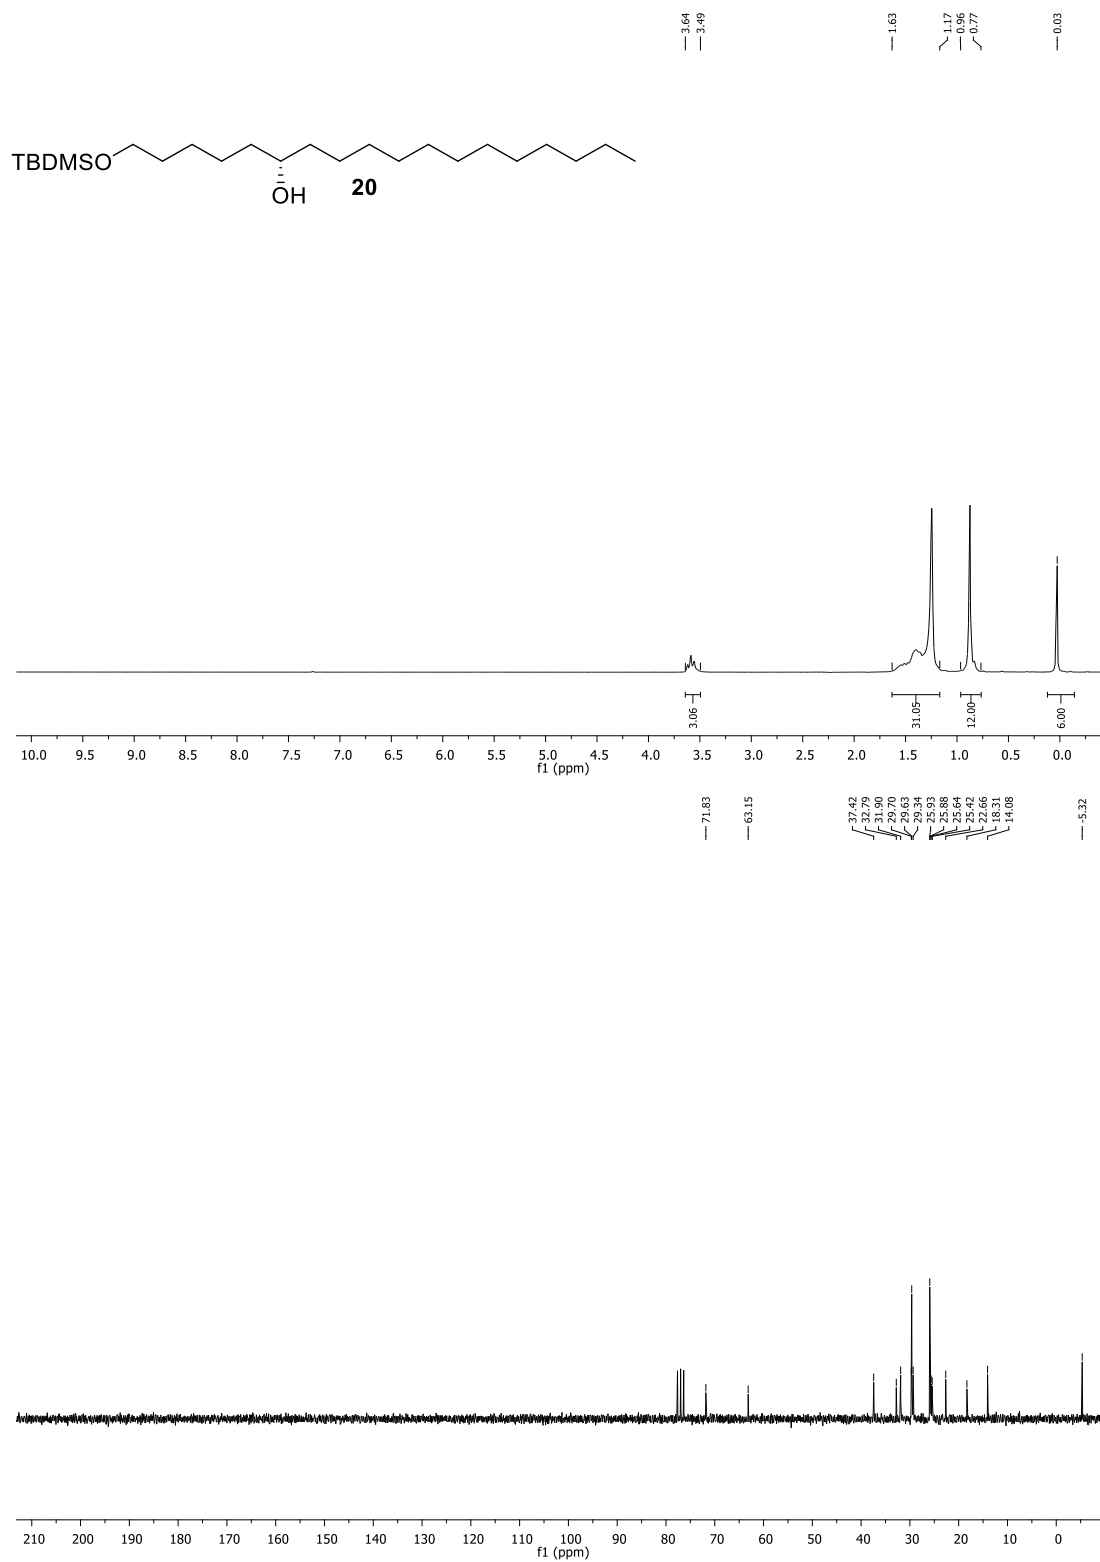

Supplement: s1 [file s1]
